# Supplementary material for: Rapid 3D-STORM imaging of diverse molecular targets in tissue
Source: PubMed Central journal article supplement — Cell Rep Methods. 2022 Jul 11;2(7):100253. doi: 10.1016/j.crmeth.2022.100253 (PMC9308169; doi:10.1016/j.crmeth.2022.100253), 2022-07-11
Supplement: mmc1.pdf [file mmc1.pdf]

**Cell Reports Methods, Volume 2**

**Supplemental information**

**Rapid 3D-STORM imaging  
of diverse molecular targets in tissue**

**Nicholas E. Albrecht, Danye Jiang, Viktor Akhanov, Robert Hobson, Colenso M. Speer, Michael A. Robichaux, and Melanie A. Samuel**

Figure S1. Optical Diagram of Vutara, Related to Figure 1.

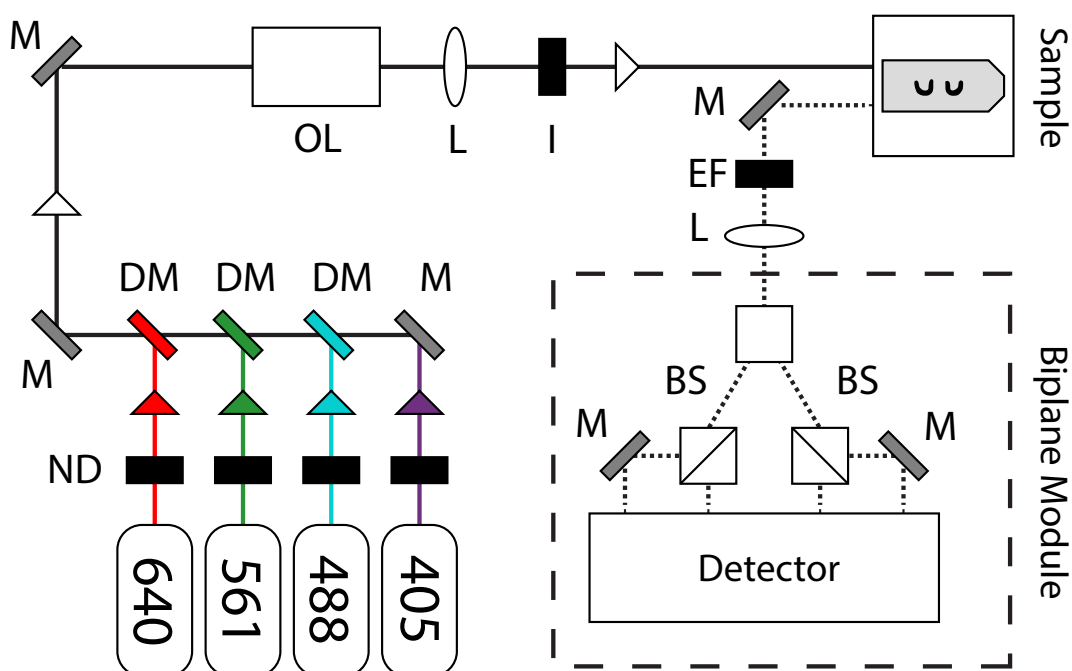

**Figure S1. Optical Diagram of Vutara, related to Figure 1.**

Layout and optical design of the Bruker Vutara SRX352, which allows 3D STORM imaging and PSF localization via a biplane module in place of a cylindrical lens. M: Mirror, DM: Dichroic mirror, ND: Neutral density filter, L: lens, BS: Beam splitter, I: iris/aperture, OL: Objective lens, EF: Emission filter.



Figure S2. RAIN-STORM resolution and localizations as a function of secondary labeling density, Related to Figure 1.

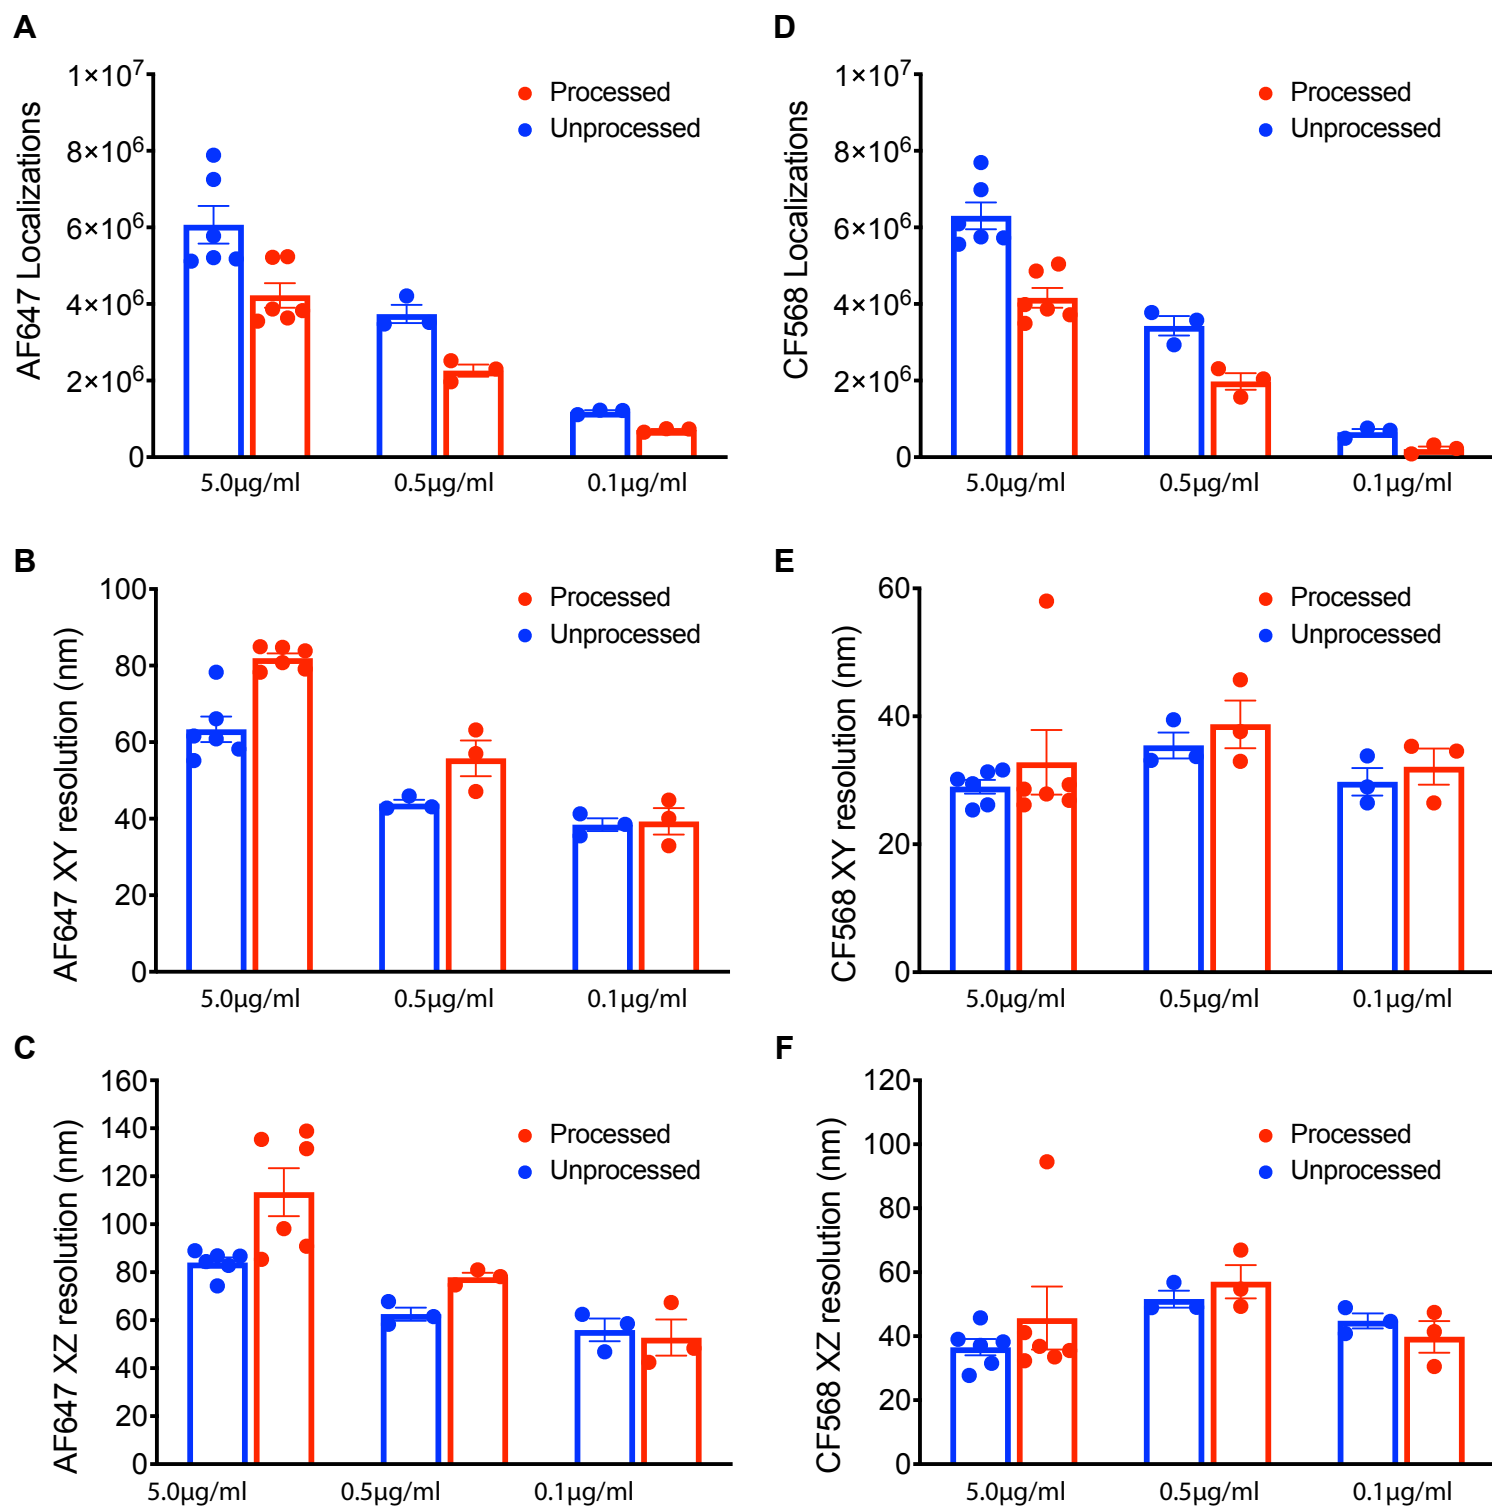

**Figure S2. RAIN-STORM resolution and localization as a function of secondary labeling density, related to Figure 1.**

**A.** Total localizations acquired when the concentration of the secondary antibody (AF647) is changed while the primary antibody concentration (Calbindin) is kept constant. Total acquired localizations decrease as secondary antibody concentration is reduced, showing  $6.07 \times 10^6 \pm 0.490 \times 10^6$  localizations at  $5.0 \mu\text{g/ml}$ ,  $3.73 \times 10^6 \pm 0.239 \times 10^6$  at  $0.5 \mu\text{g/ml}$ , and  $1.19 \times 10^6 \pm 0.038 \times 10^6$  at  $0.1 \mu\text{g/ml}$ . **B-C.** The associated XY (**B**) and XZ (**C**) resolutions as secondary antibody concentration is changed. At  $5.0 \mu\text{g/ml}$ ,  $R_{xy} = 63.4 \pm 3.3 \text{nm}$  and  $R_{xz} = 84.0 \pm 2.1 \text{nm}$ , at  $0.5 \mu\text{g/ml}$ ,  $R_{xy} = 44.0 \pm 1.0 \text{nm}$  and  $R_{xz} = 62.6 \pm 2.8 \text{nm}$ , while at  $0.1 \mu\text{g/ml}$ ,  $R_{xy} = 38.4 \pm 1.7 \text{nm}$  and  $R_{xz} = 56.0 \pm 4.7 \text{nm}$ . **D.** Total localizations acquired when the concentration of the secondary antibody (CF568) is changed while the primary antibody concentration (PSD95) is kept constant. As for AF647, total acquired localizations decrease as secondary antibody concentration is reduced showing  $6.30 \times 10^6 \pm 0.347 \times 10^6$  localizations at  $5.0 \mu\text{g/ml}$ ,  $3.43 \times 10^6 \pm 0.254 \times 10^6$  at  $0.5 \mu\text{g/ml}$ , and  $0.656 \times 10^6 \pm 0.079 \times 10^6$  at  $0.1 \mu\text{g/ml}$ . **E-F.** The associated XY (**E**) and XZ (**F**) resolutions as secondary antibody concentration is changed. At  $5.0 \mu\text{g/ml}$ ,  $R_{xy} = 29.0 \pm 1.1 \text{nm}$  and  $R_{xz} = 36.6 \pm 2.6 \text{nm}$ , at  $0.5 \mu\text{g/ml}$ ,  $R_{xy} = 35.5 \pm 2.0 \text{nm}$  and  $R_{xz} = 51.6 \pm 2.6 \text{nm}$ , while at  $0.1 \mu\text{g/ml}$ ,  $R_{xy} = 29.8 \pm 2.2 \text{nm}$  and  $R_{xz} = 44.8 \pm 2.3 \text{nm}$ .  $N = 3$ . Data are represented as the mean  $\pm$  the s.e.m.

Figure S3. Protein target validation and RAIN-STORM imaging of diverse molecular targets, Related to Figure 4.

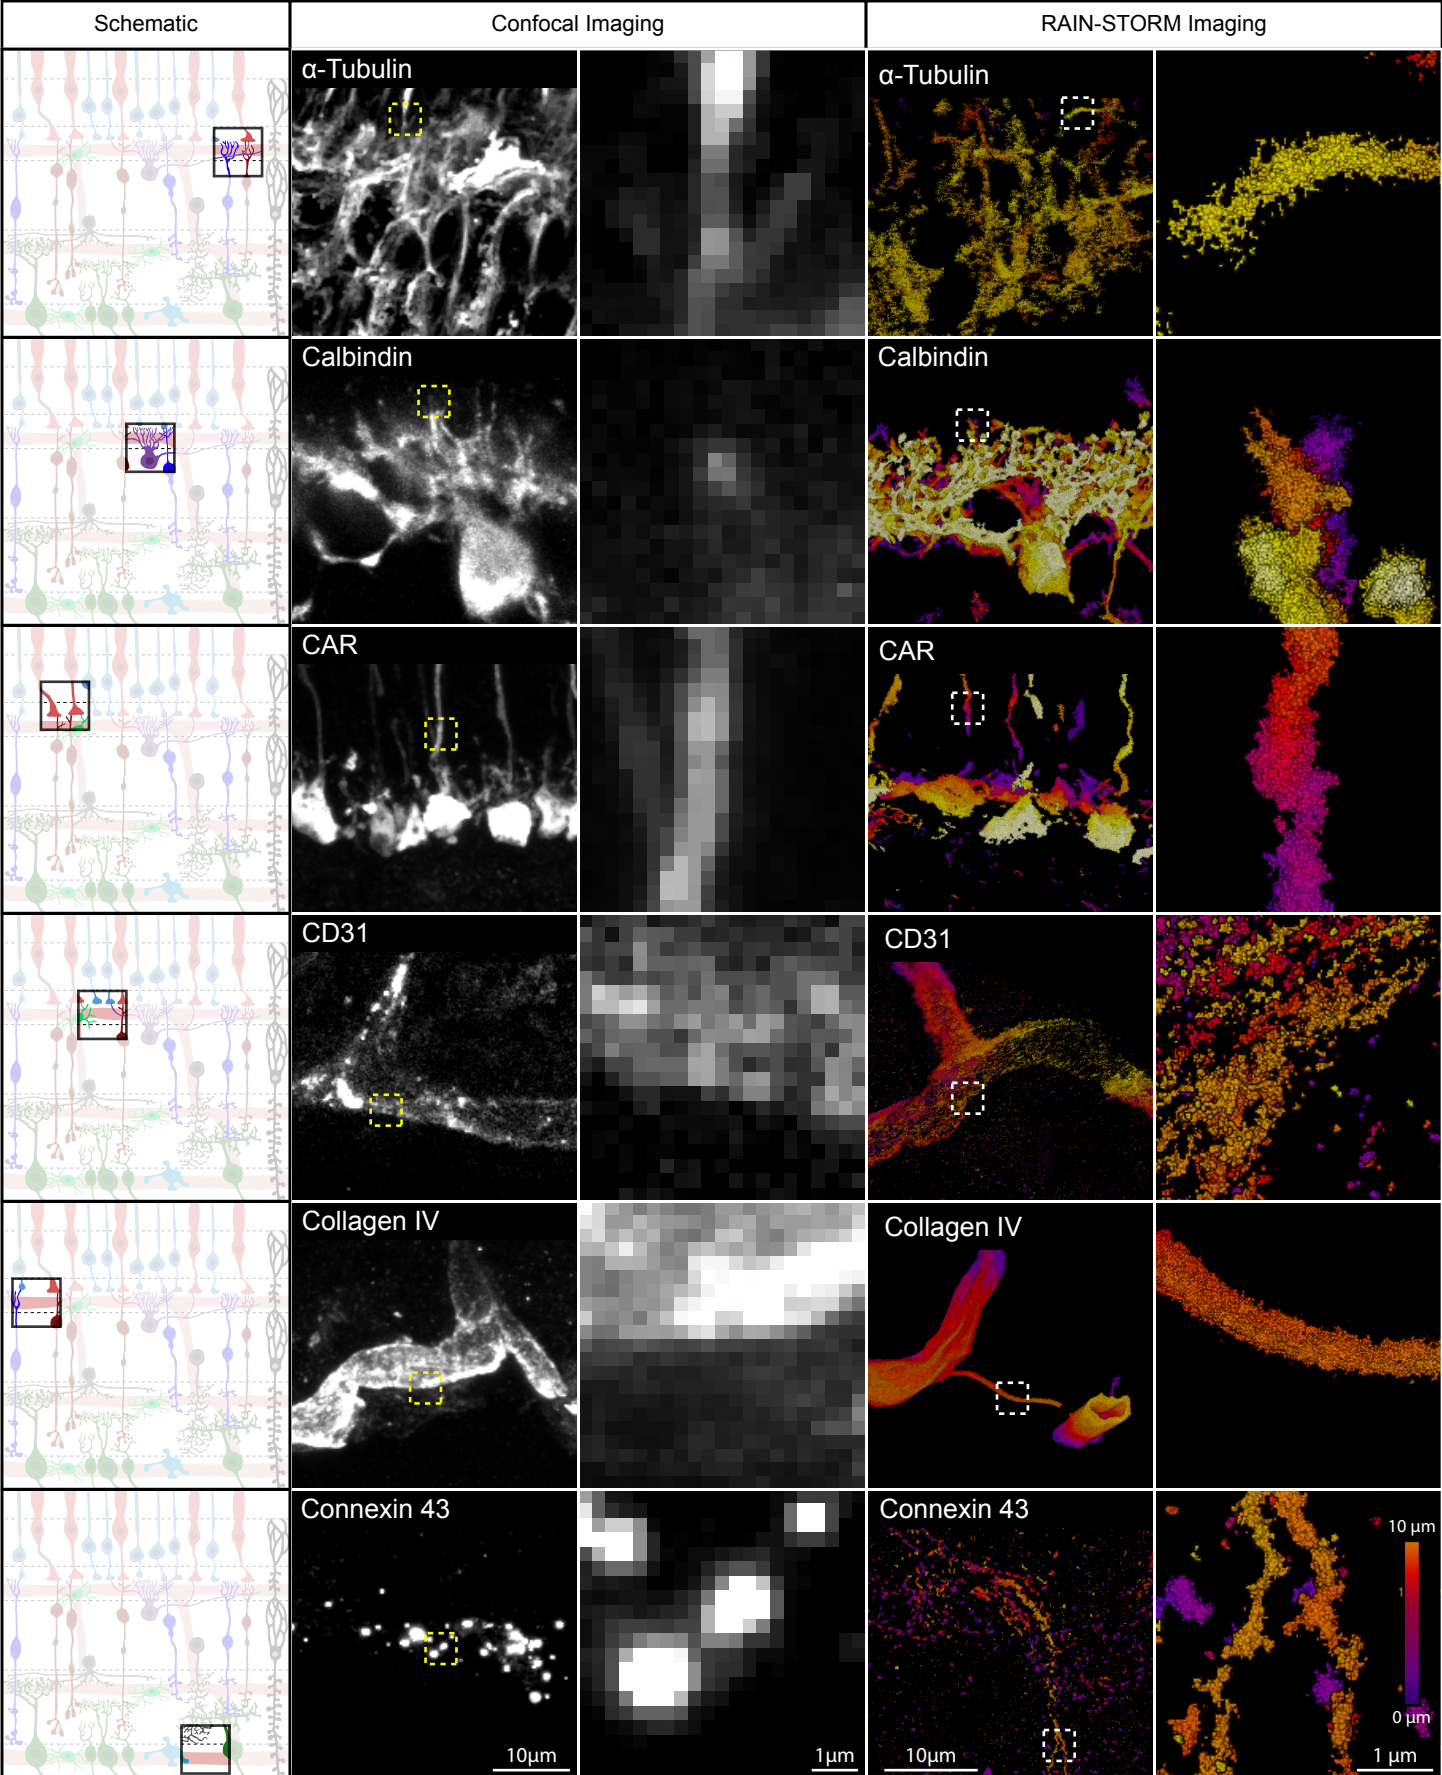

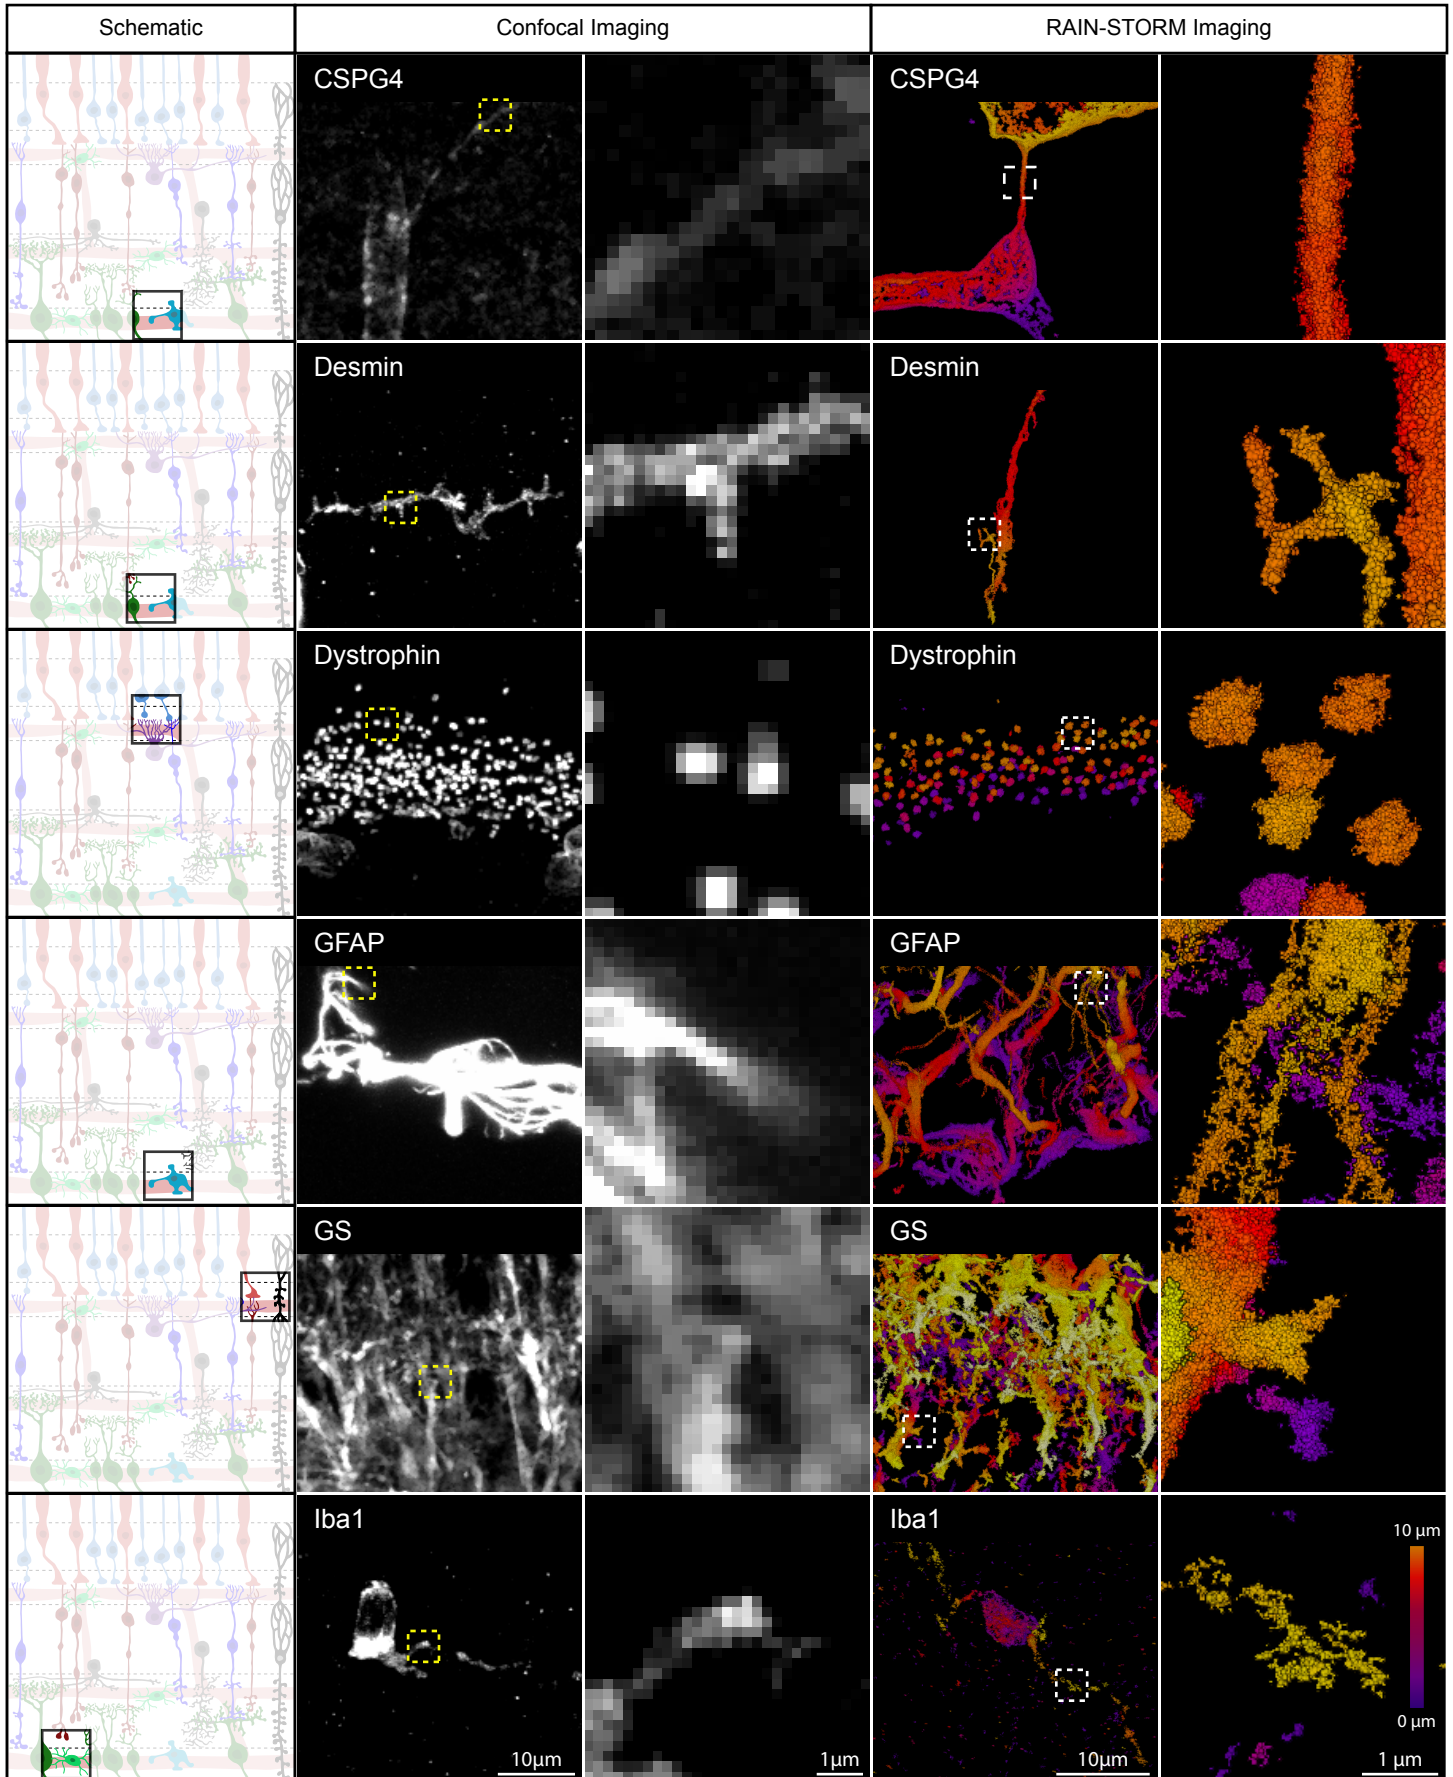



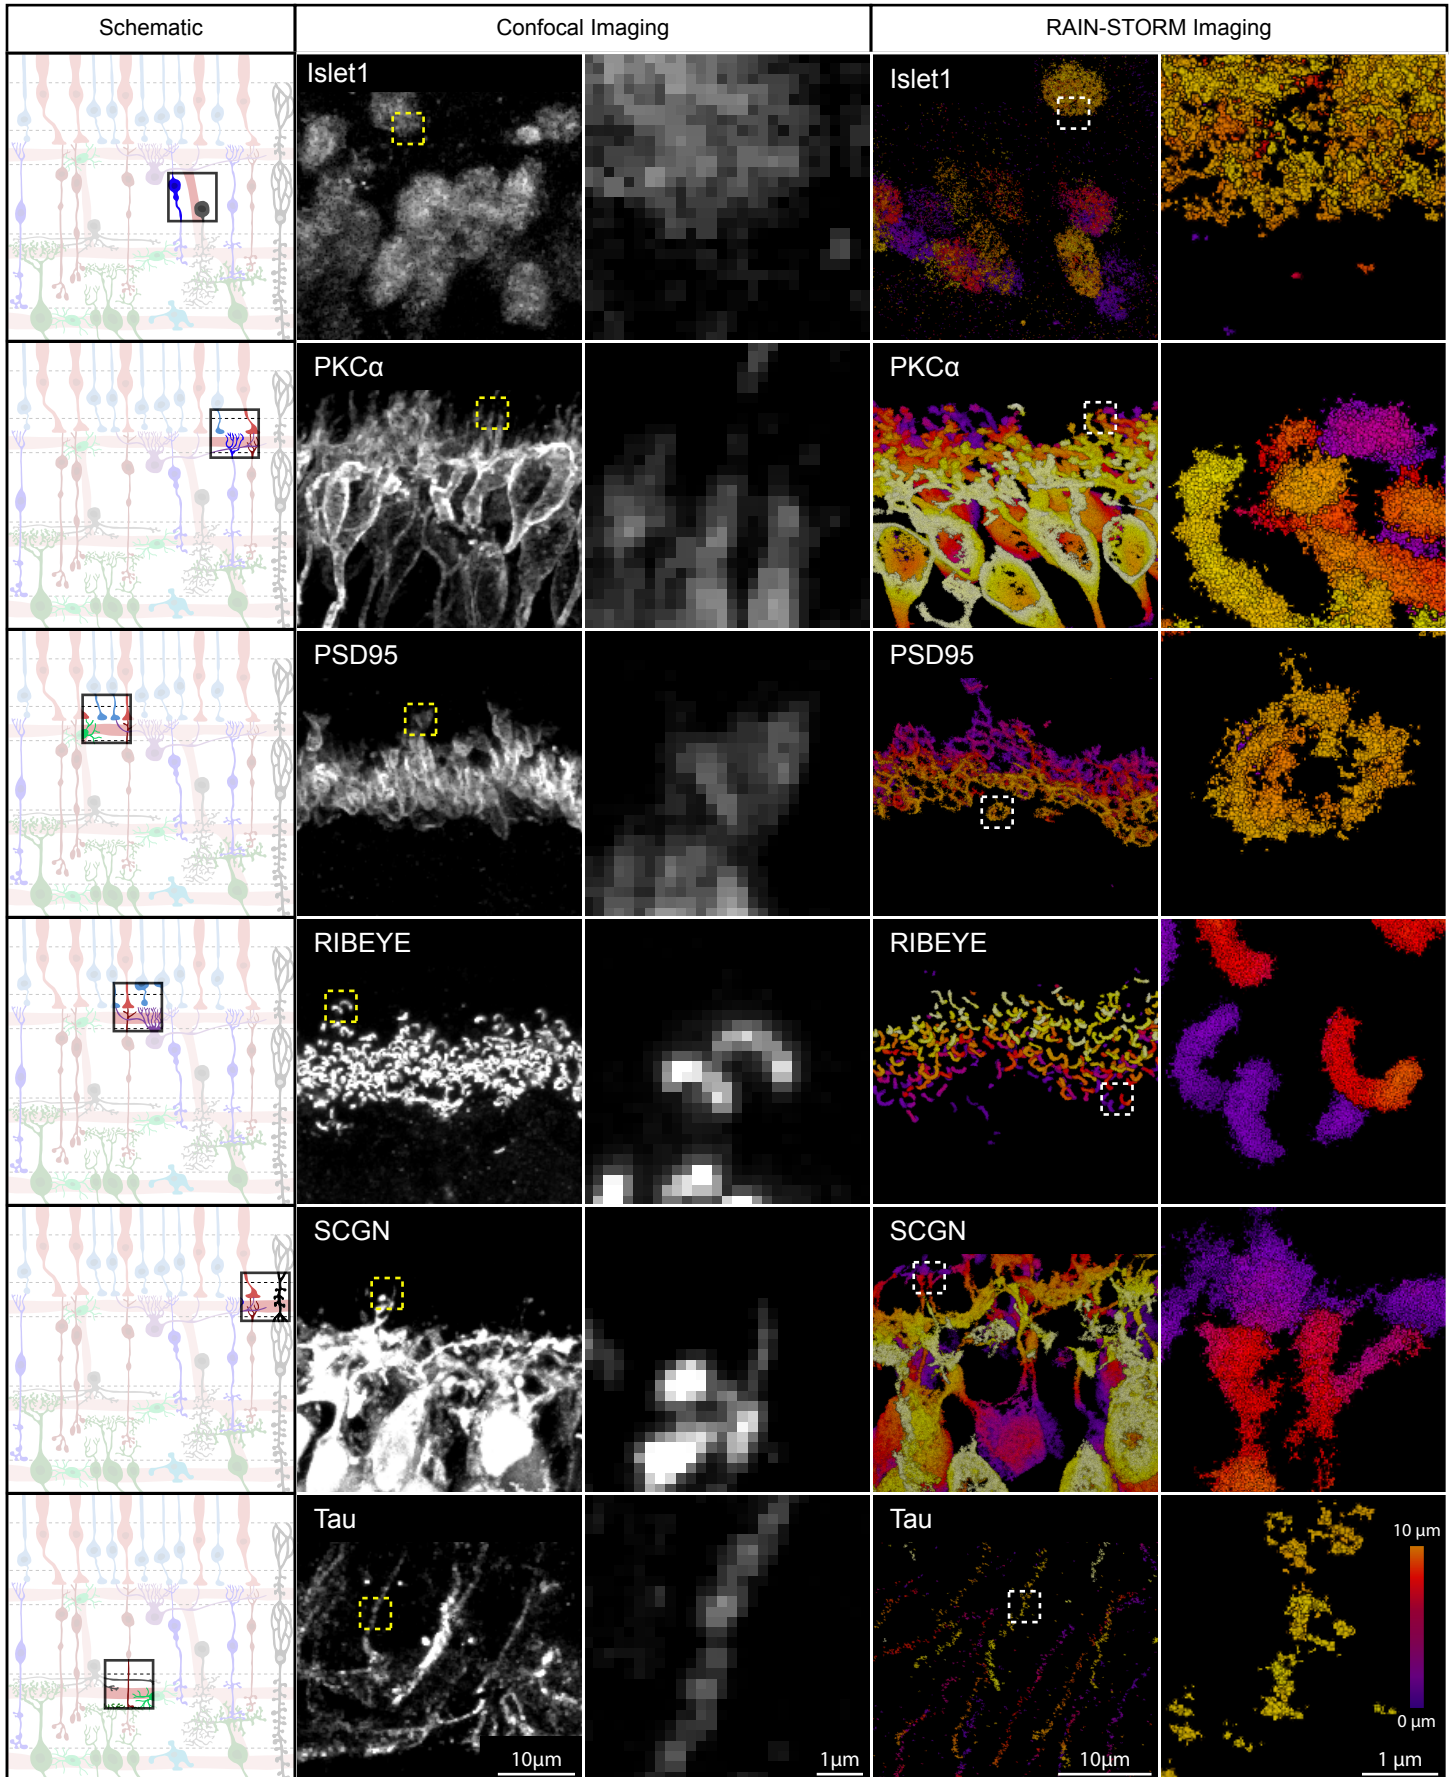

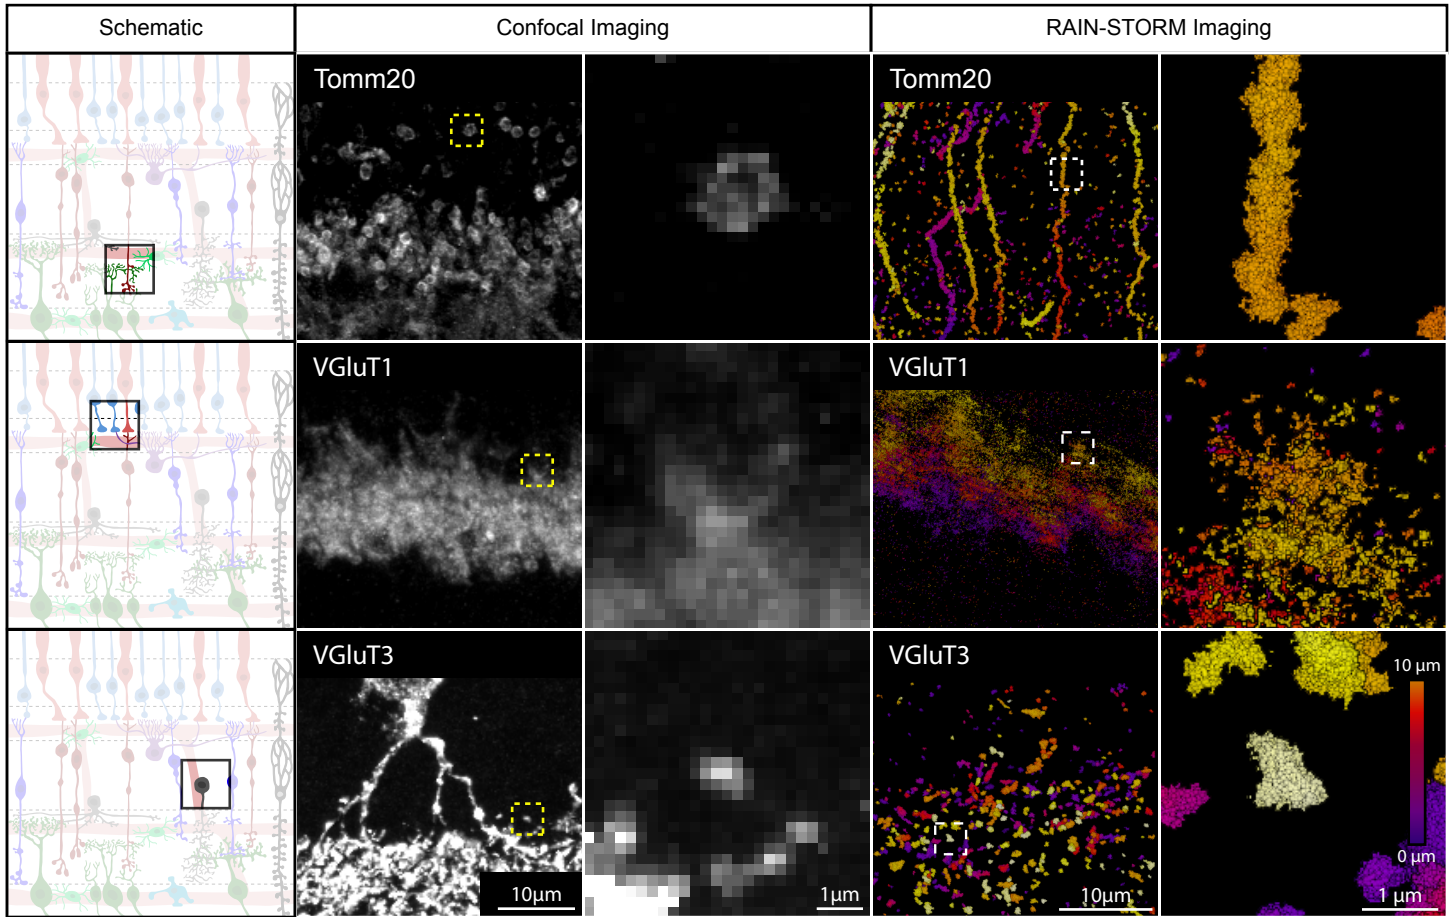

**Figure S3. Protein target validation and RAIN-STORM imaging of diverse molecular targets, related to Figure 4.**

A representative retina schematic for each target is shown in which the region of interest is boxed (left column). Cellular structure and labeling patterns from the fluorescence confocal based images were obtained (middle columns) and used as a baseline with which to compare the reliability and robustness of RAIN-STORM imaging for various targets. Boxed regions in confocal images are magnified in images to the right. For each target, tissue was then prepared using our optimized RAIN-STORM protocol (right most columns). Representative images for each antibody are shown, followed by a magnified view of the same general structure (boxed region) shown in the fluorescence image. RAIN-STORM optimized imaging was robust across these diverse targets and antibodies, demonstrating the combability of this protocol with a wide variety of proteins. Images are representative from N = 3 animals. All confocal images are intensity-based representations of fluorescence while STORM-based images show reconstructions formed from individual localizations. STORM images are color-coded by depth (purple, to yellow, 10 $\mu$ m). Scale bars = 10 and 1  $\mu$ m.

Figure S4. RAIN-STORM delivers robust imaging in the Nikon N-STORM system, Related to Figure 1.

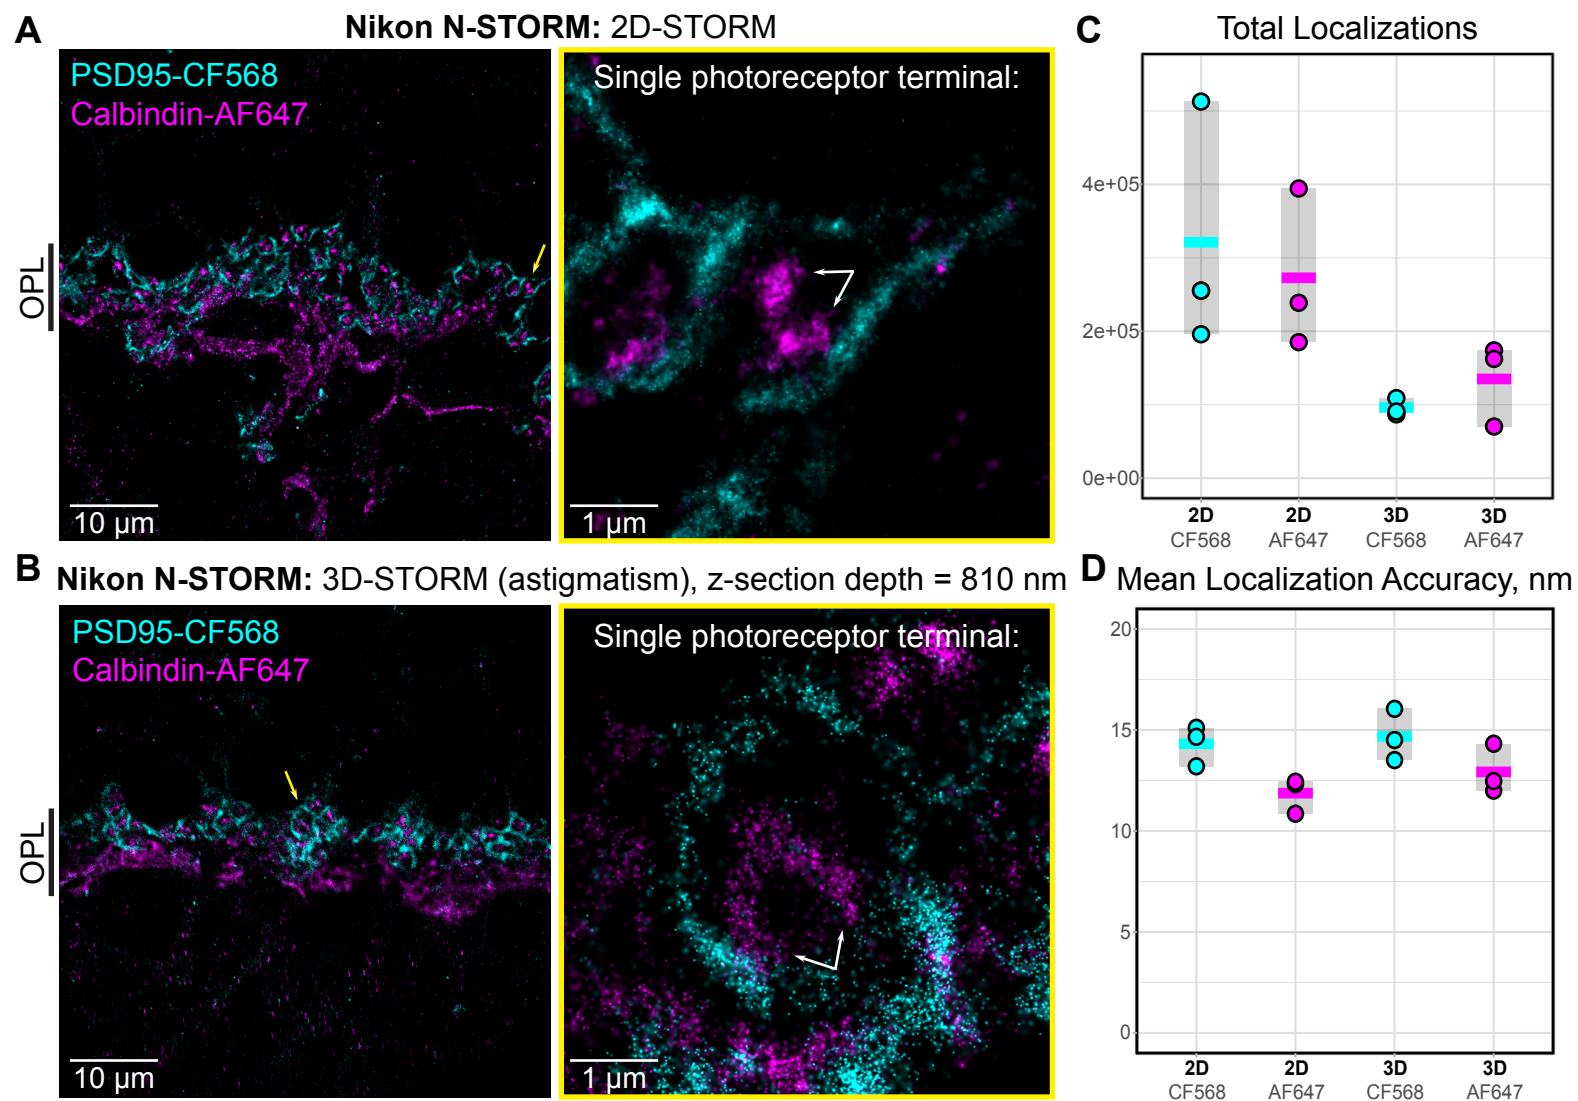



**Figure S4: RAIN-STORM delivers robust imaging in the Nikon N-STORM system.**

Mouse retina cryosections were prepared using our optimized RAIN-STORM protocol. Horizontal cells in the outer plexiform layer (OPL) were immunolabeled with Calbindin + AF647 secondary labeling (magenta), and pre-synaptic photoreceptor terminals (spherules and pedicles) were labeled with PSD-95 + CF568 secondary labeling (cyan). STORM acquisition and analyses were performed on a Nikon N-STORM system. **A.** A 2D-STORM example reconstruction is shown with an adjacent magnified example of an individual photoreceptor terminal (yellow arrow) containing distinct Calbindin+ horizontal cell processes (white arrows). Analysis settings for 2D-STORM data were based on (Robichaux et al., 2019) and were as follows: Minimum PSF height: 1,000, Maximum PSF height: 65,636, Minimum PSF Width: 200 nm, Maximum PSF Width: 400 nm, Initial Fit Width: 300 nm, Max Axial Ratio: 1.15, Max Displacement: 1 pixel. **B.** A 3D-STORM example reconstruction after Z-position astigmatism fitting is shown with another example magnified photoreceptor terminal (yellow arrow) encircling horizontal cell processes (white arrows). More permissive 3D-STORM analysis settings were used to enable astigmatism fitting: Minimum PSF height: 1,000, Maximum PSF height: 65,000, Minimum PSF Width: 200 nm, Maximum PSF Width: 700 nm, Initial Fit Width: 300 nm, Max Axial Ratio: 2.5, Max Displacement: 1 pixel. The z-sectioning depth of 3D-STORM reconstructions was 810 nm. All data points in the STORM reconstructions were visualized as “Gaussians” based on individual brightness and localization accuracy values. **C.** Total localizations and **D.** mean localization accuracy values are plotted as circles for both channels from 3 replicate 2D- and 3D-STORM acquisitions demonstrating reproducibility and high-quality fitting. Gray bars indicate the range, and

horizontal lines indicate the mean values. Graphs were generated using PlotsOfData (Postma and Goedhart, 2019).

# Data S1. Sample and imaging conditions affect image quality and metrics, Related to Figure 4.

## Staining - Blocking, NDS

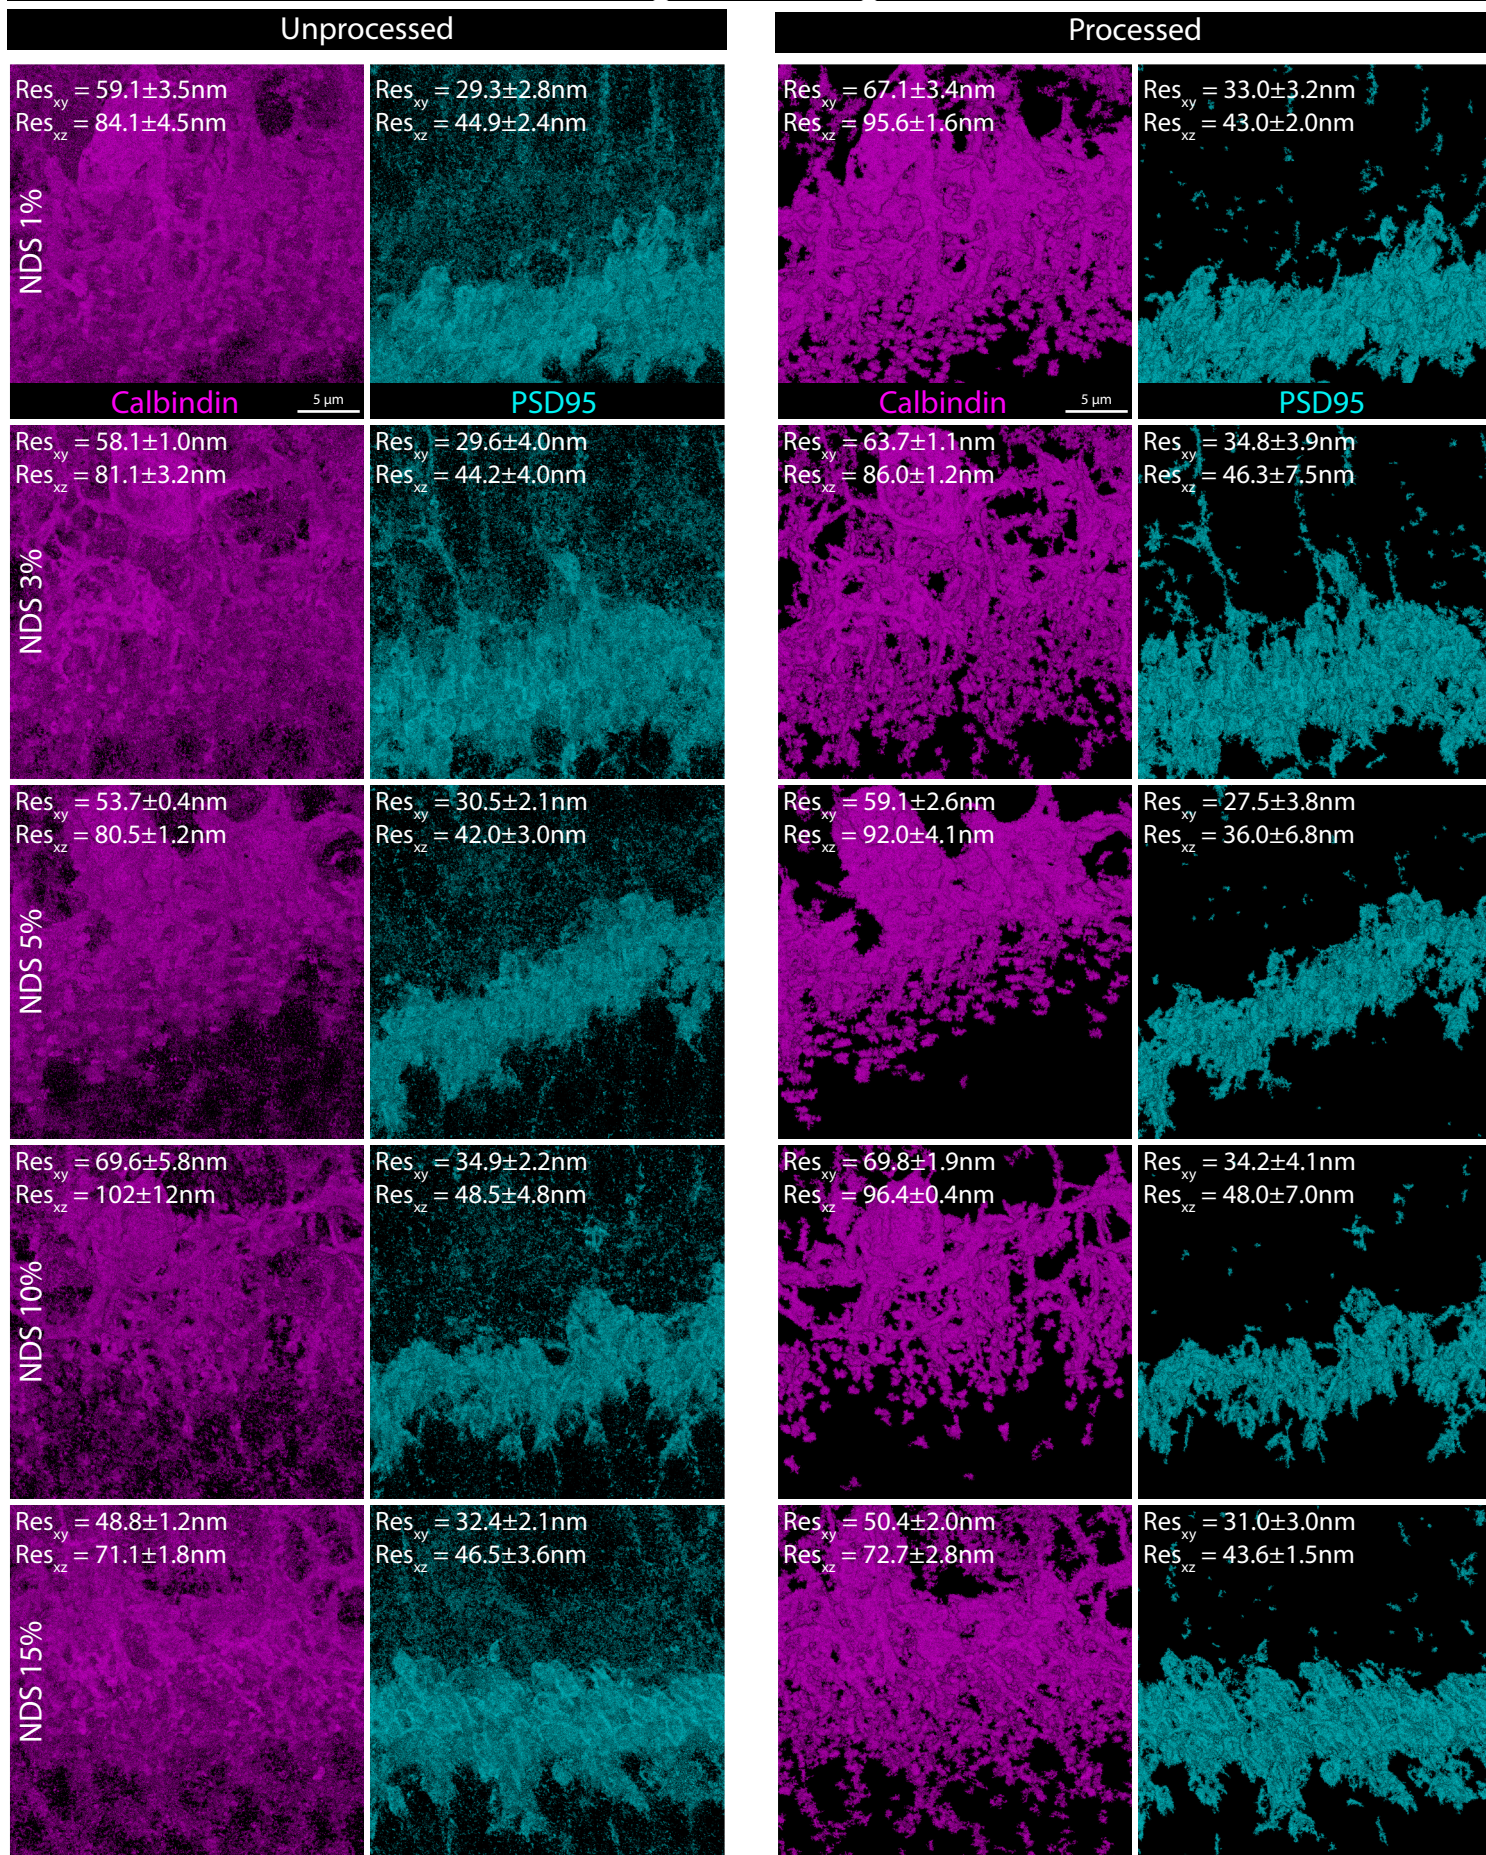



# Staining - Blocking, Triton-X100

## Unprocessed

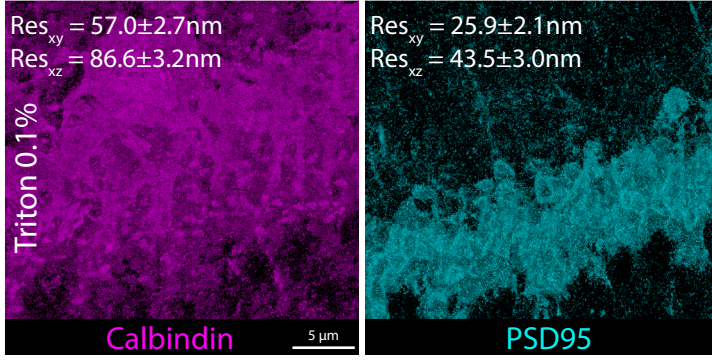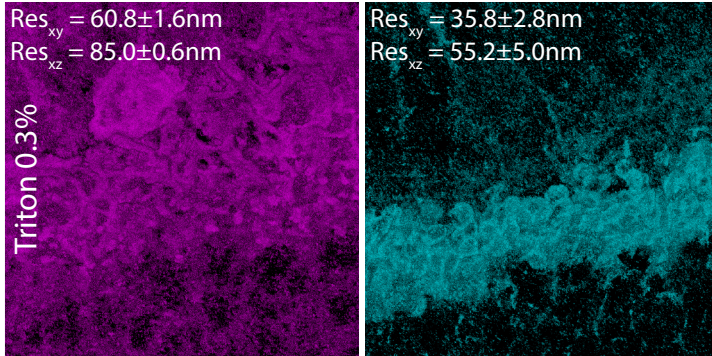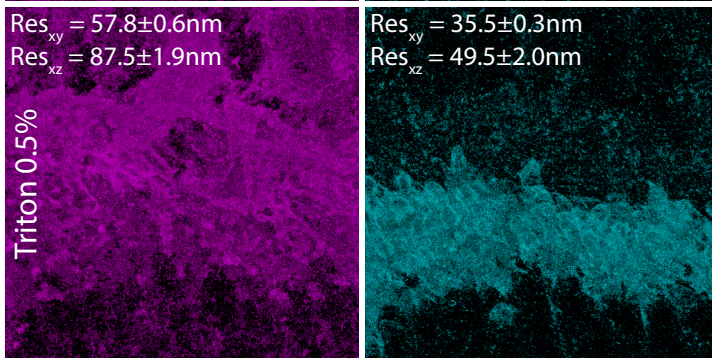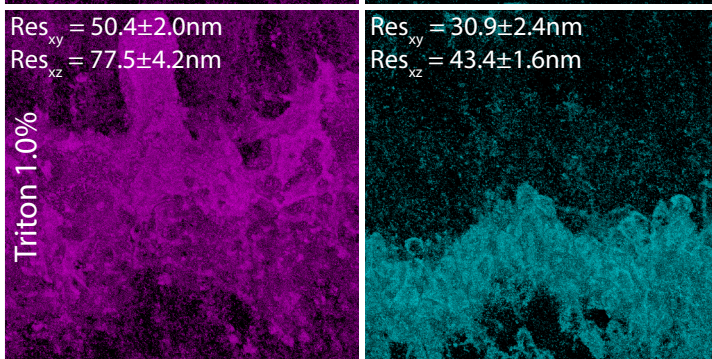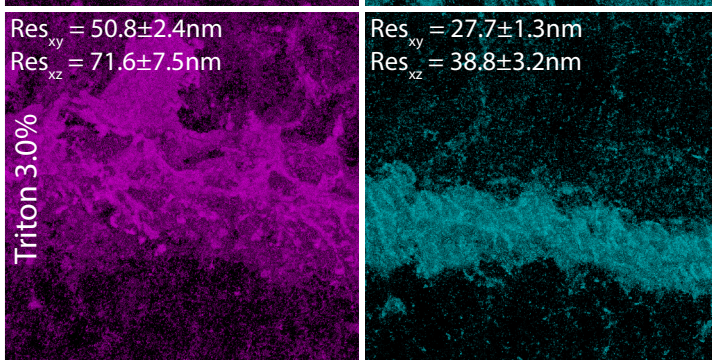

## Processed

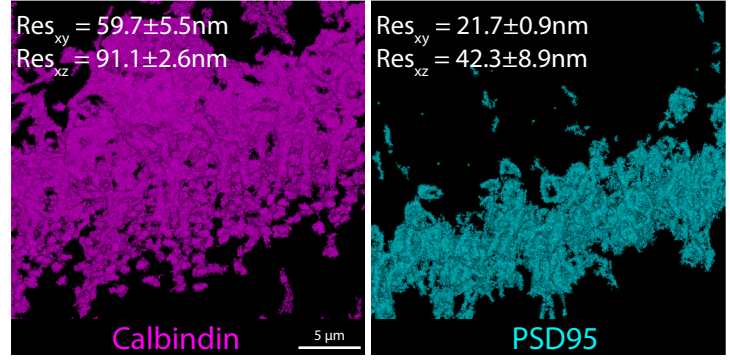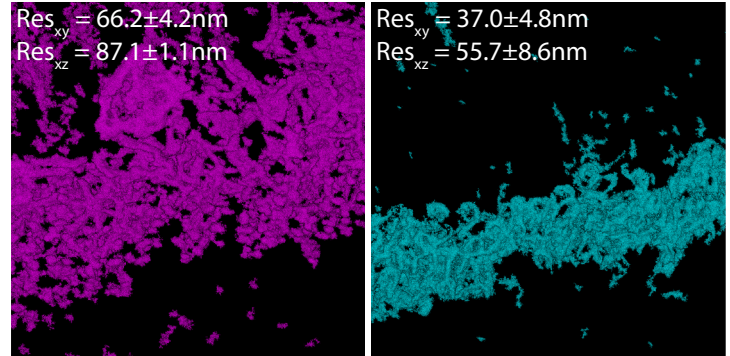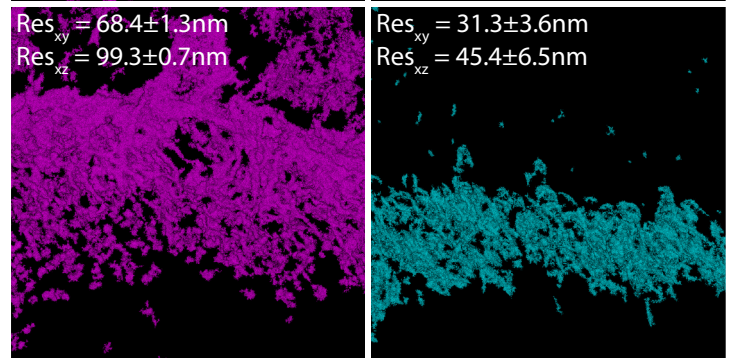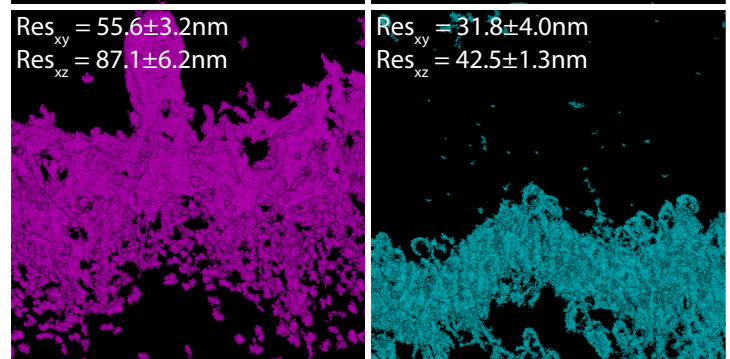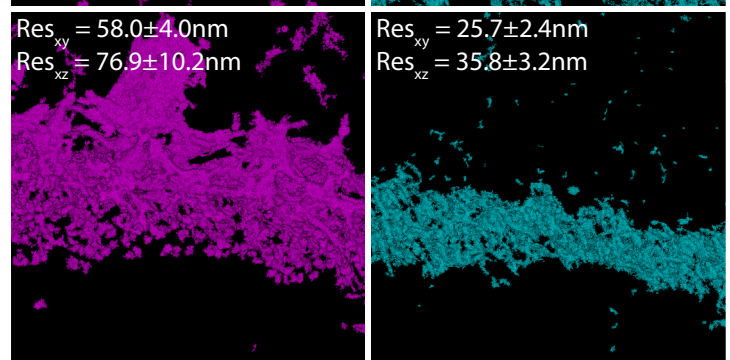



# Staining - Blocking, Saponin

## Unprocessed

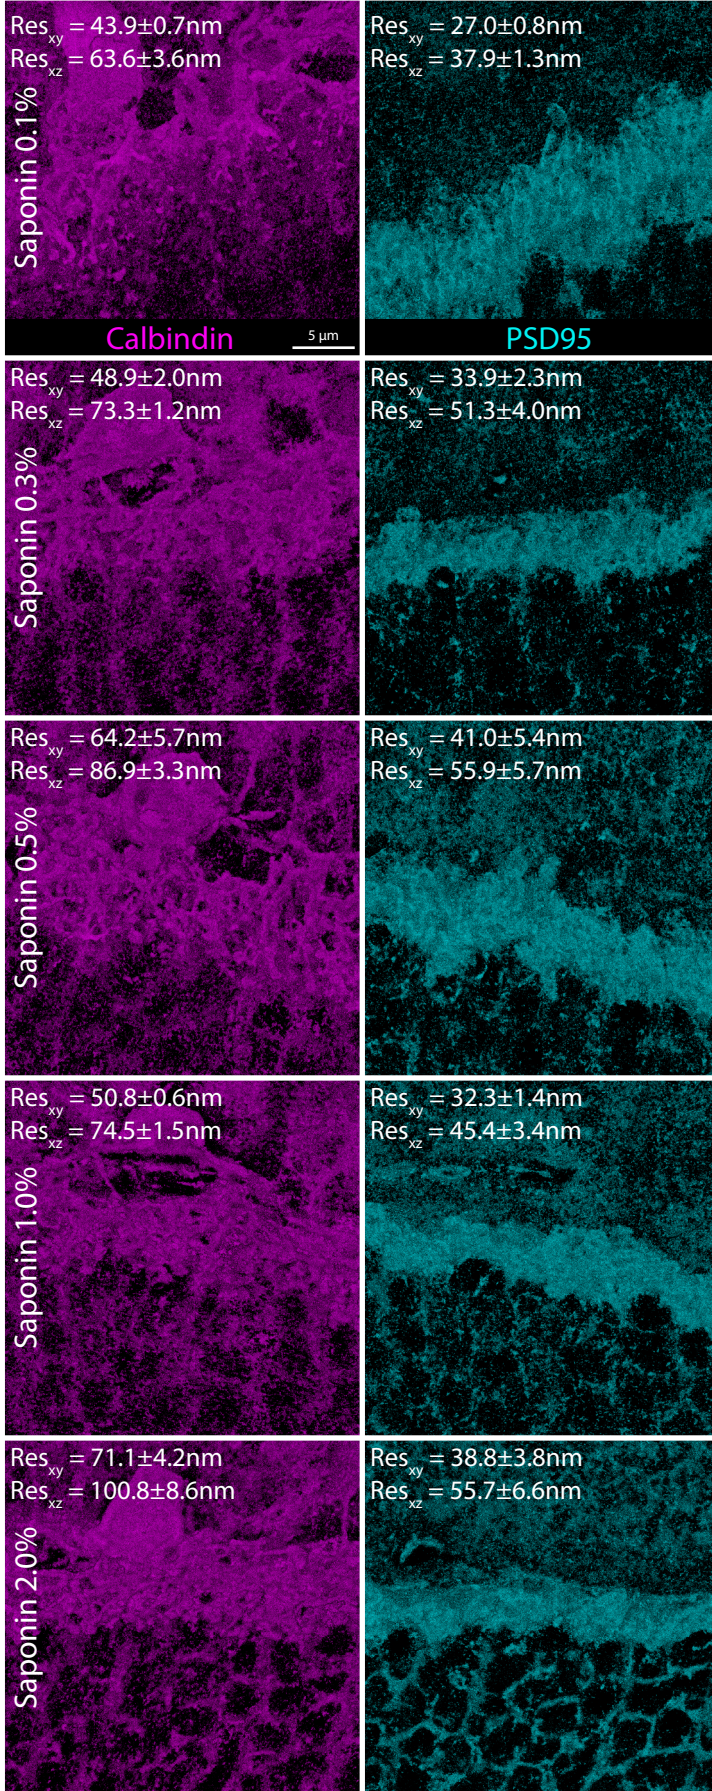

## Processed

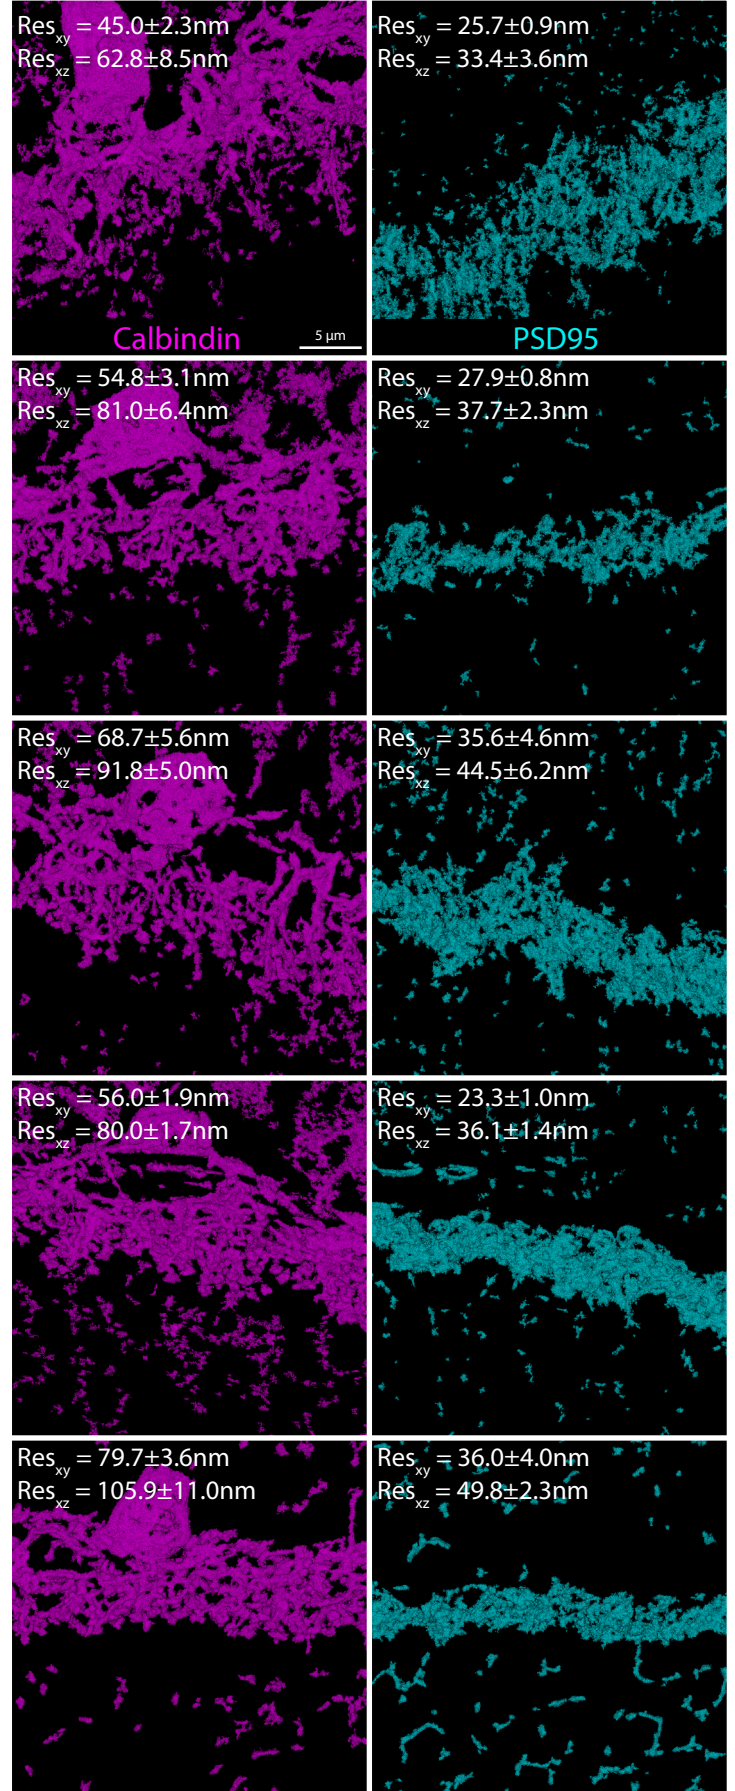



Figure S4. Sample and imaging conditions affect image quality and metrics, Related to Figure 4.

### Staining - Blocking, NDS





# Staining - Blocking, Triton-X100

## Unprocessed

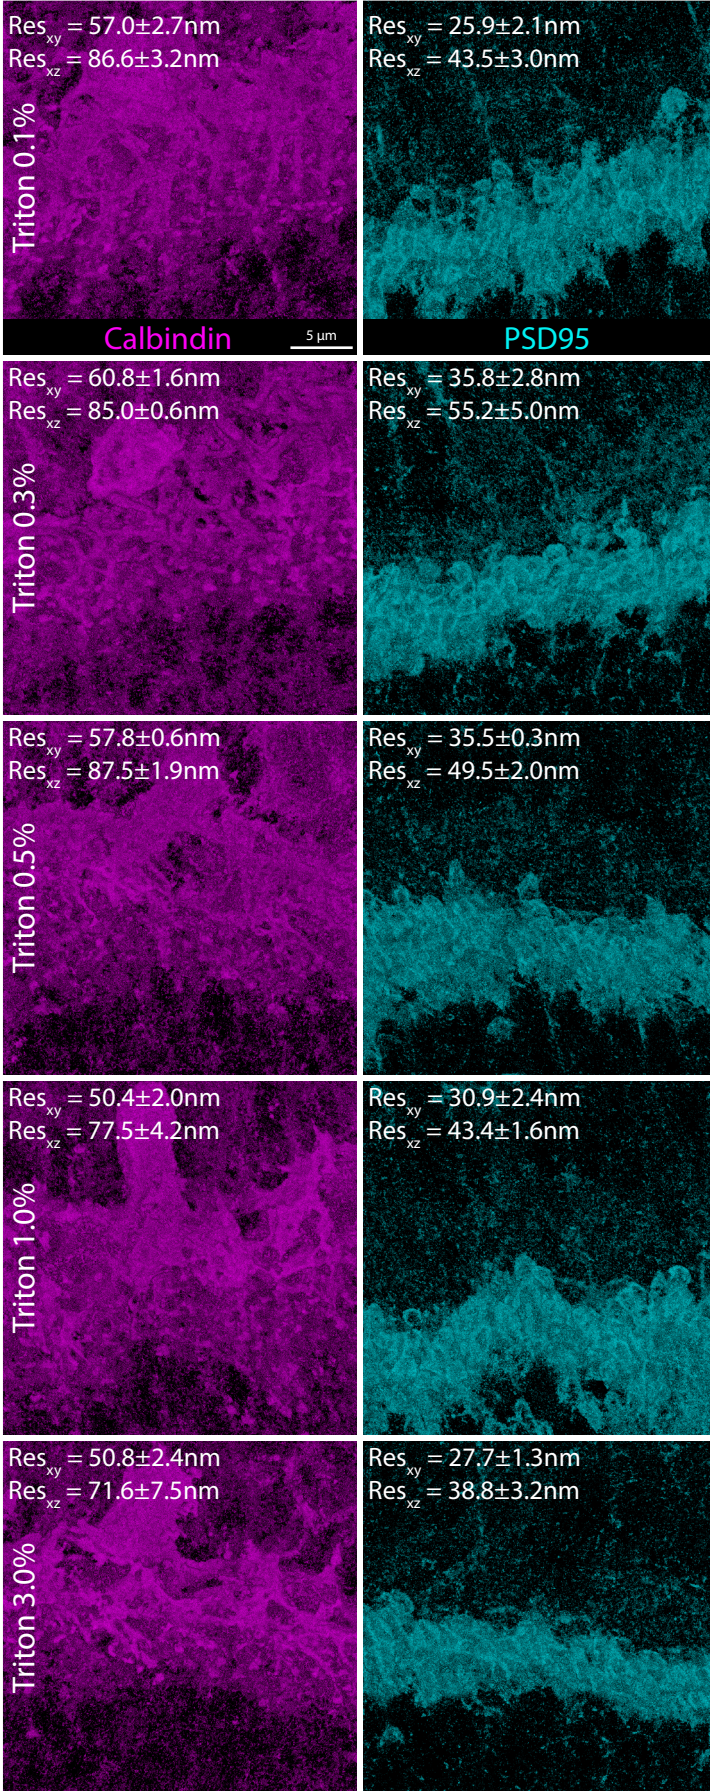

## Processed

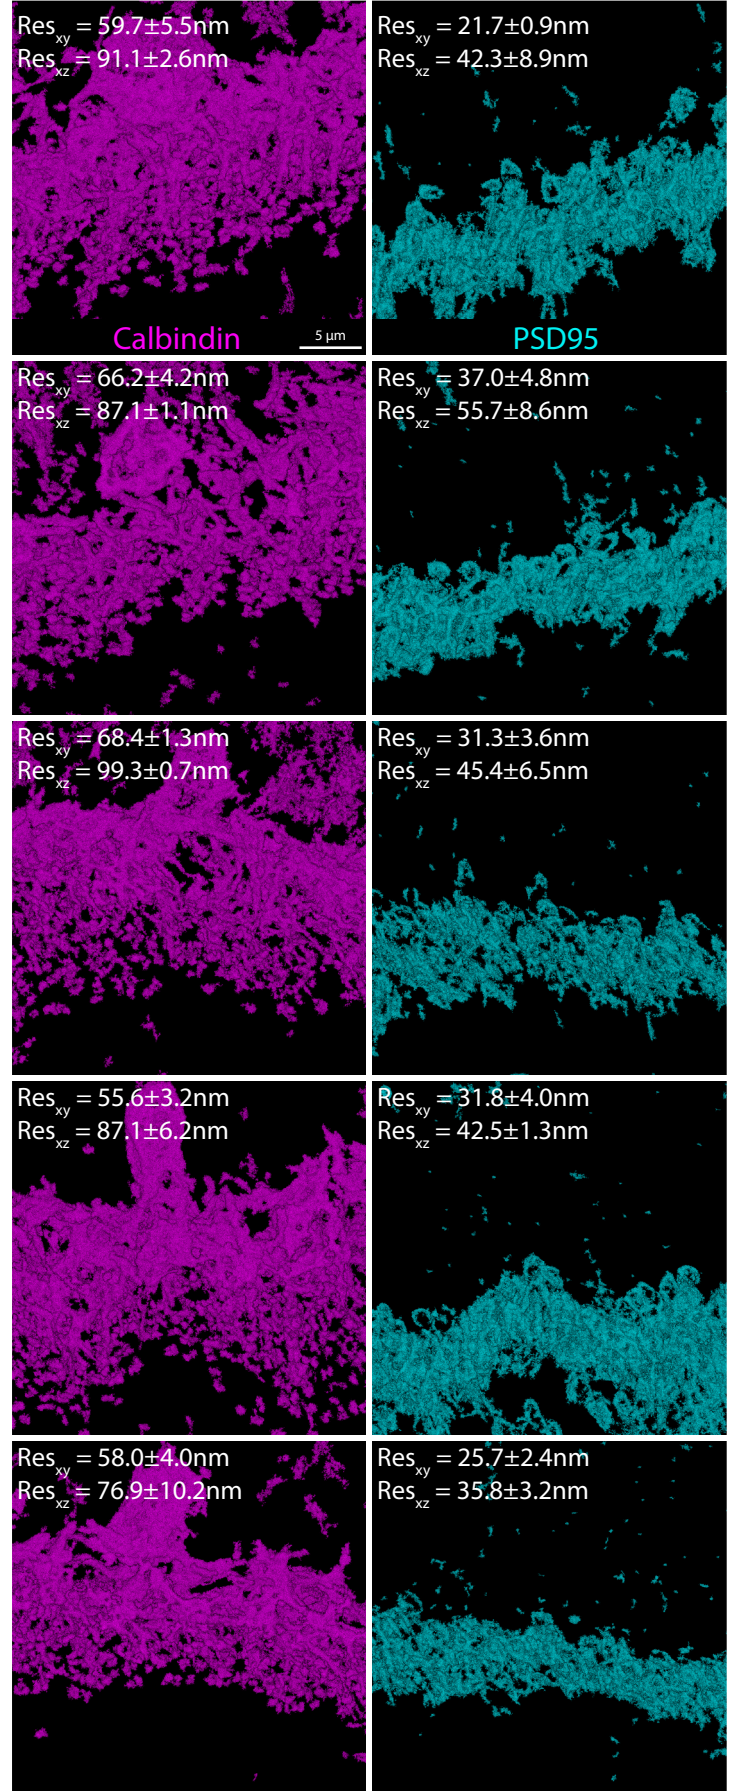



# Staining - Blocking, Saponin

Unprocessed

Processed

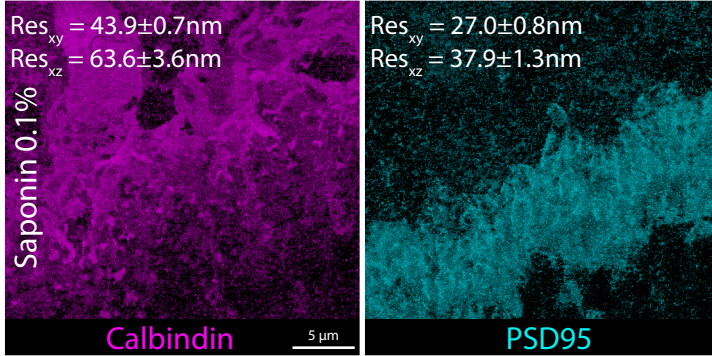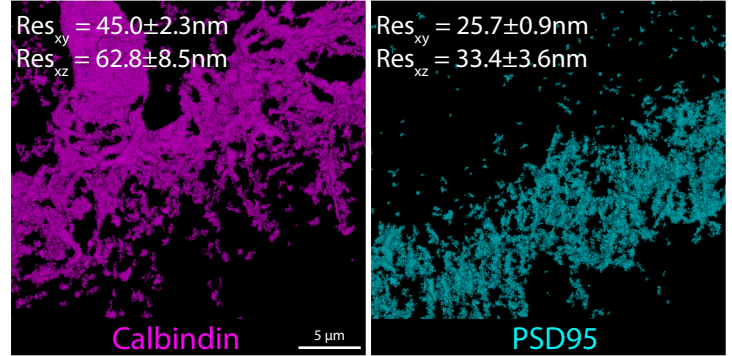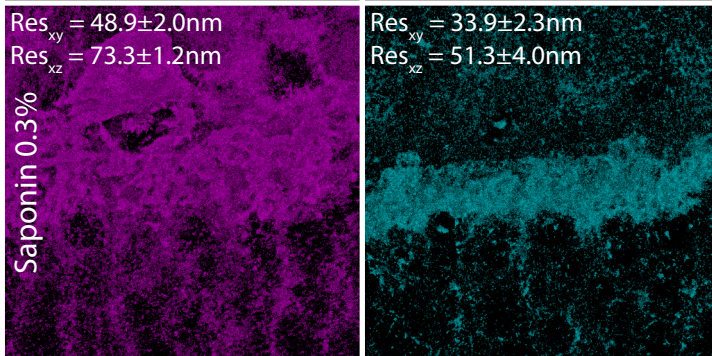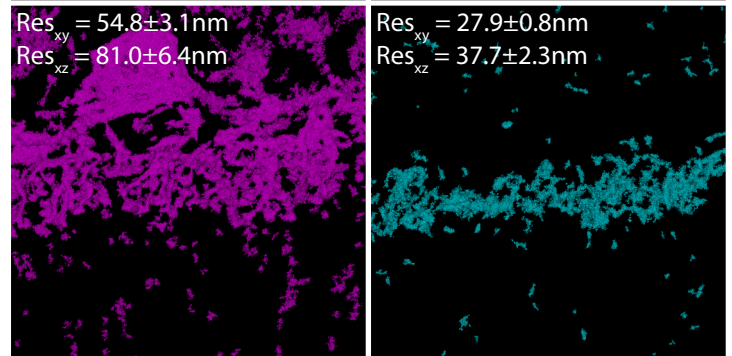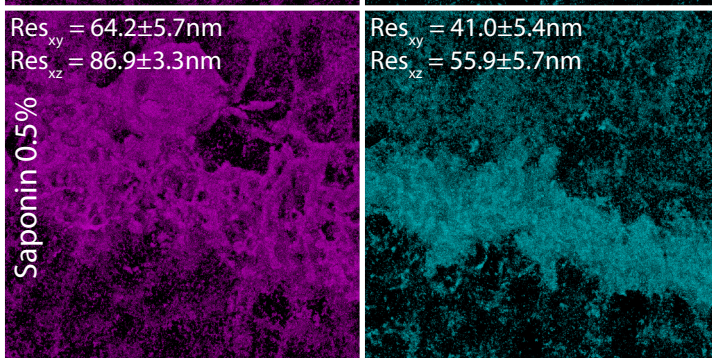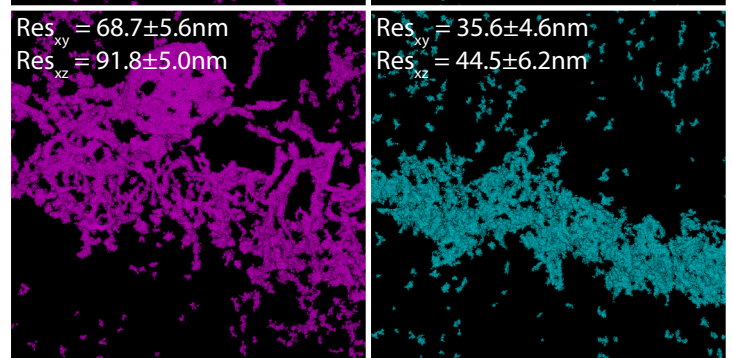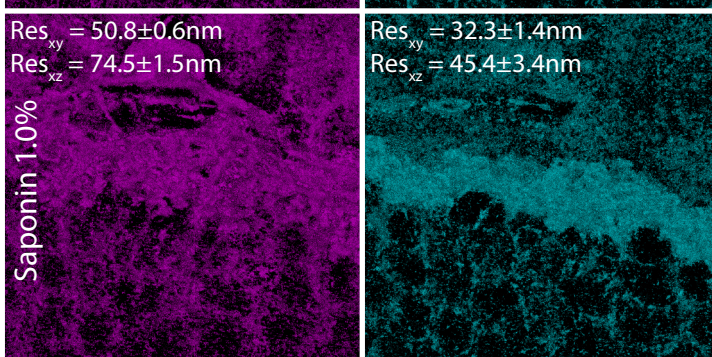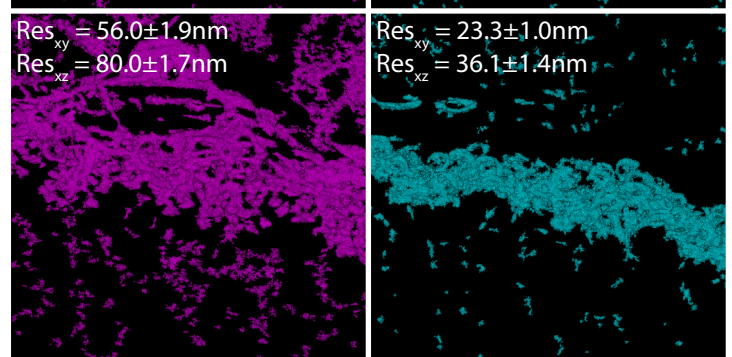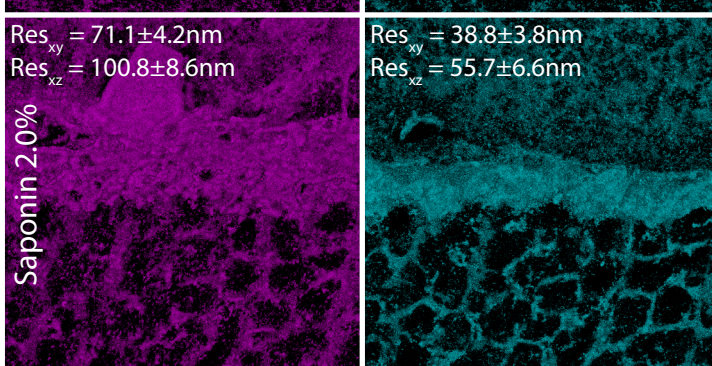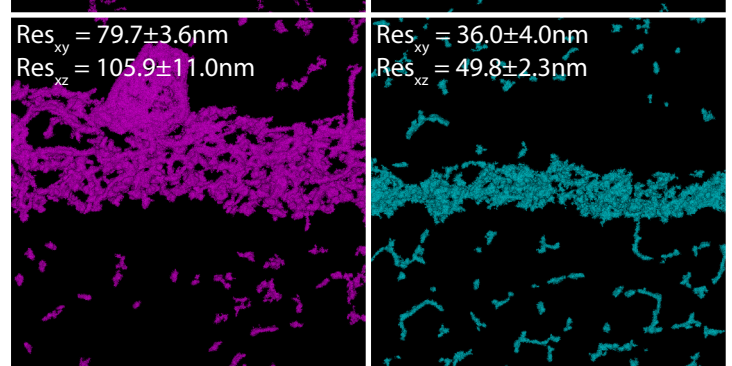



# Staining - Post-Fixation, Time & Concentration

## Unprocessed

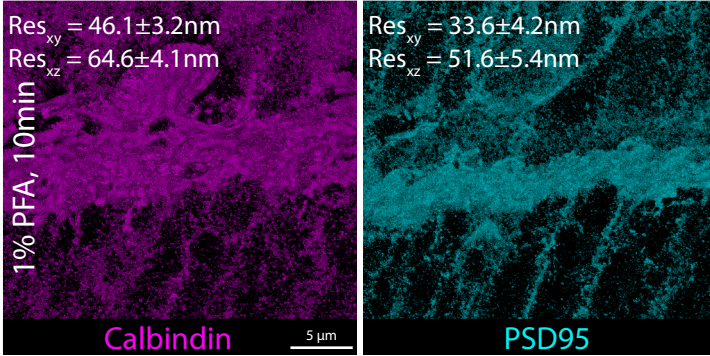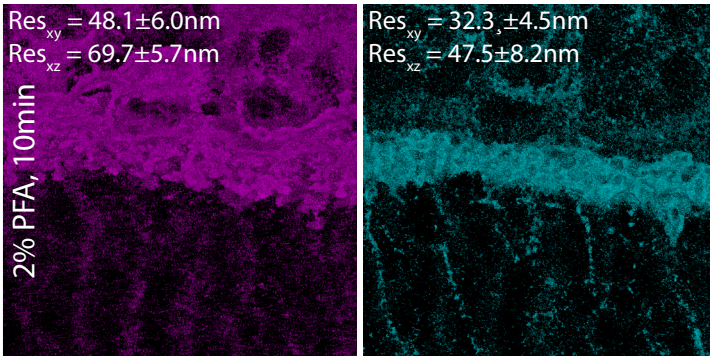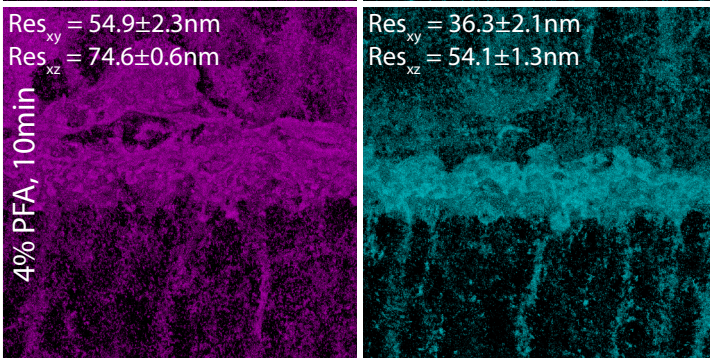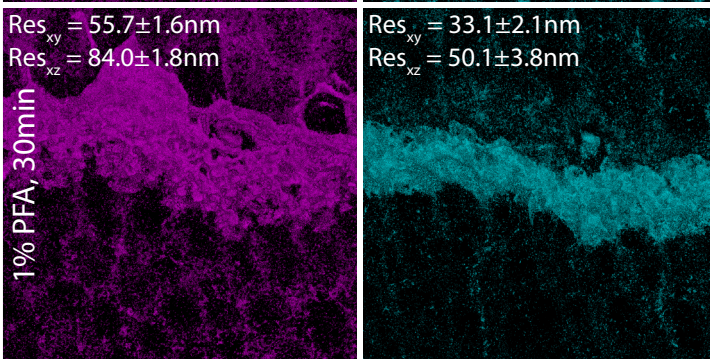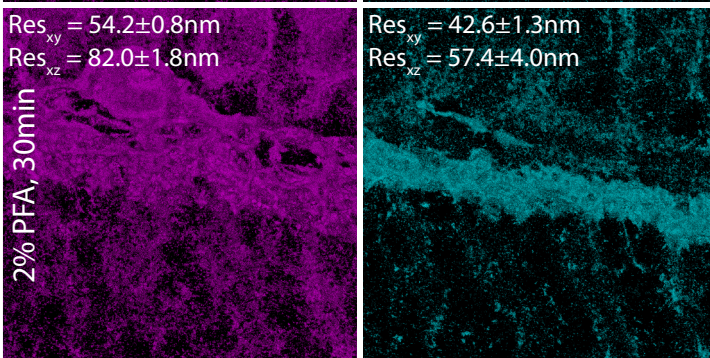

## Processed

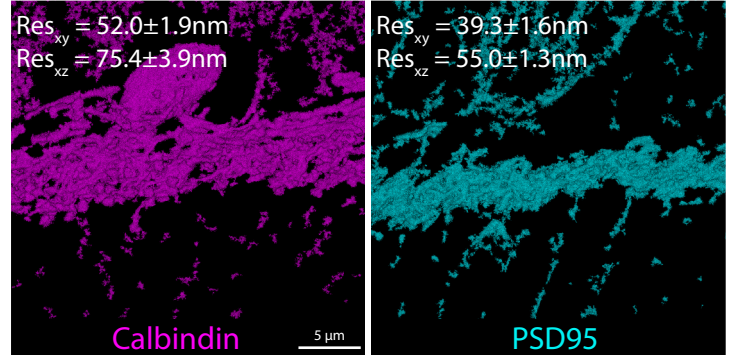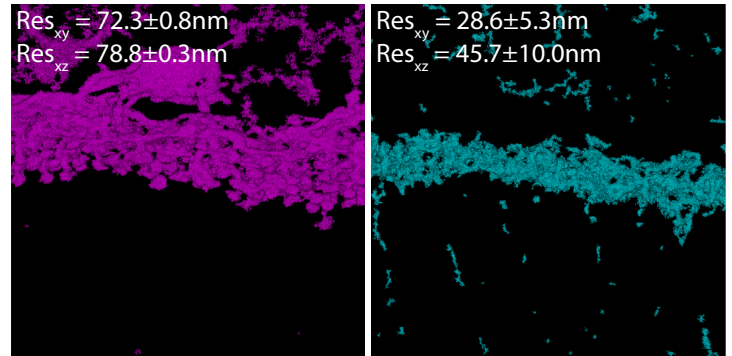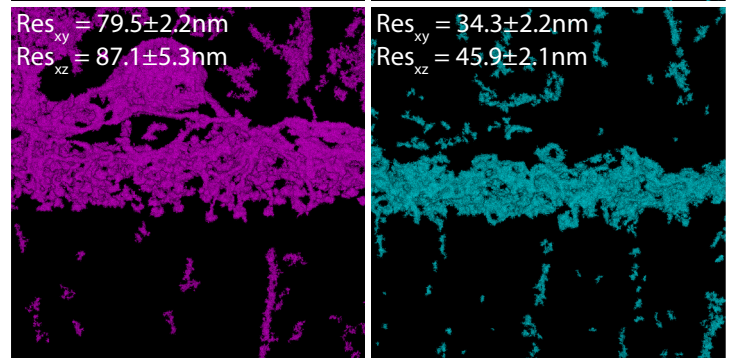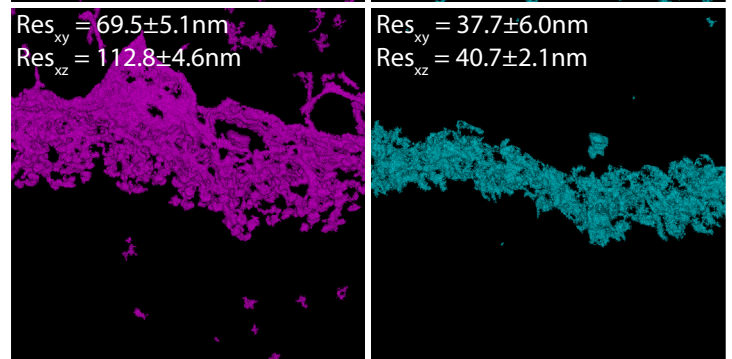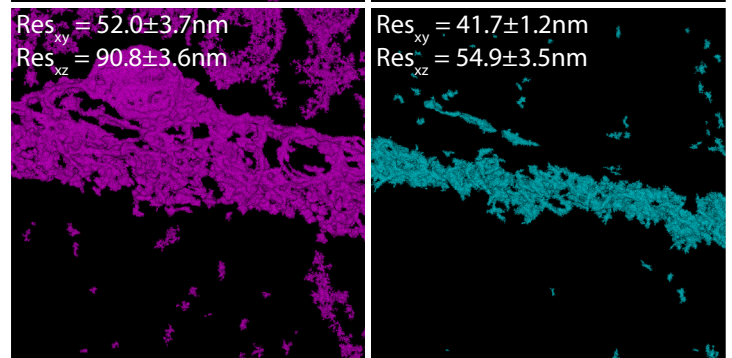



# Staining - Post-Fixation, Time & Concentration

Unprocessed

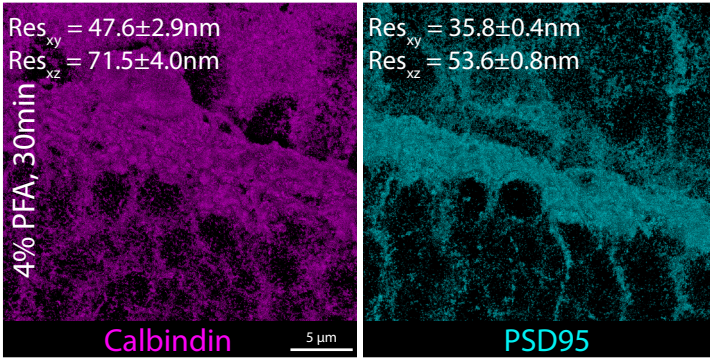

Processed

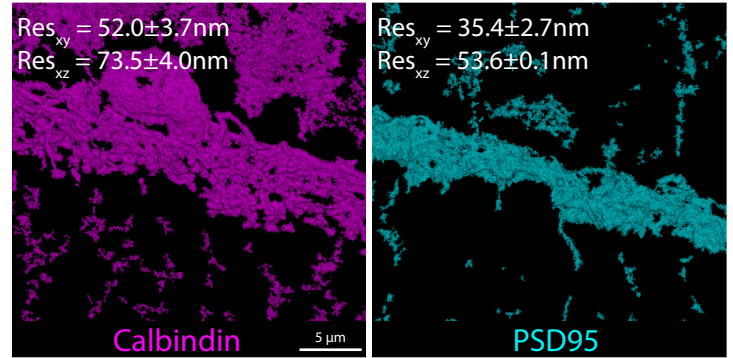

# Staining - Blocking, Time & Temperature

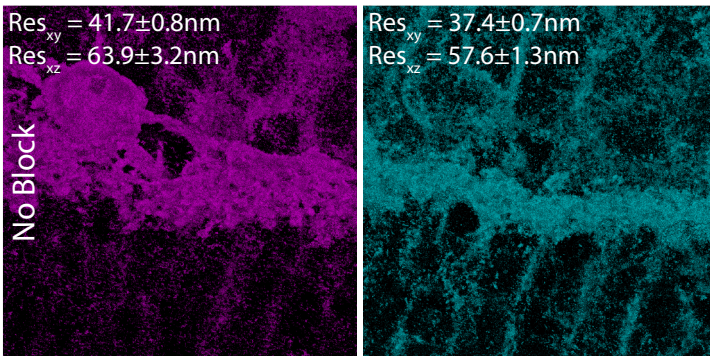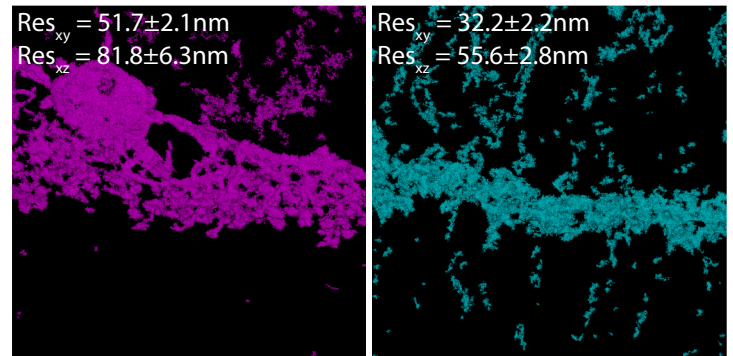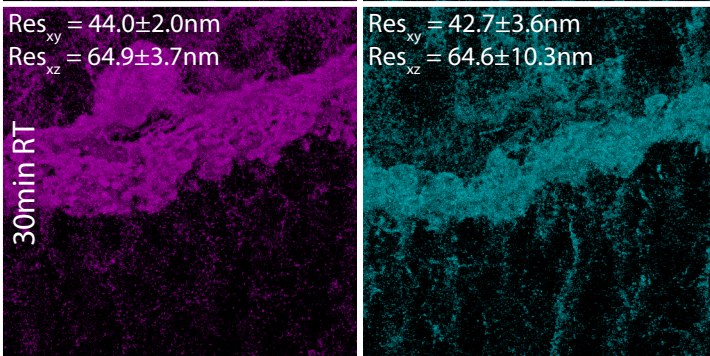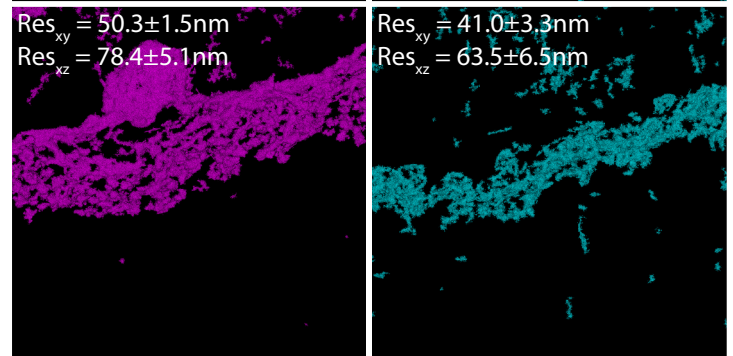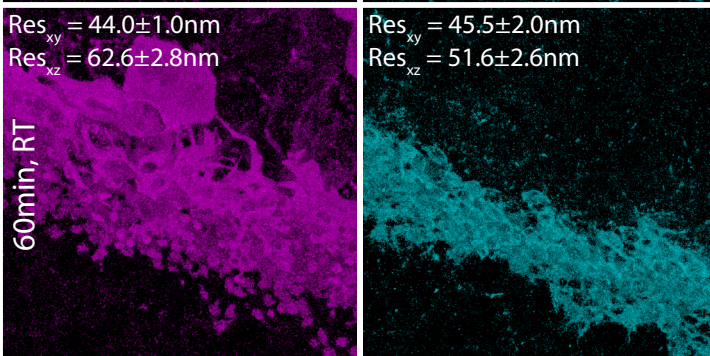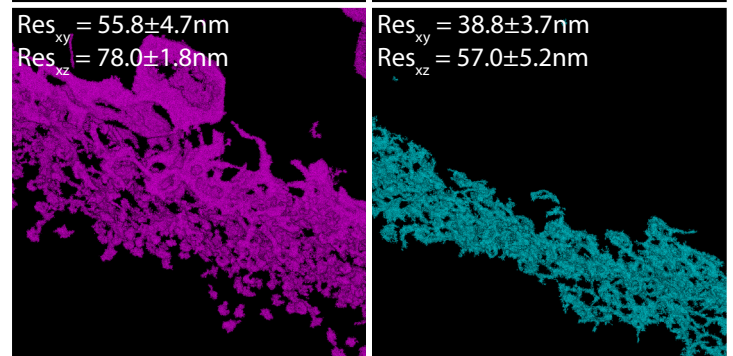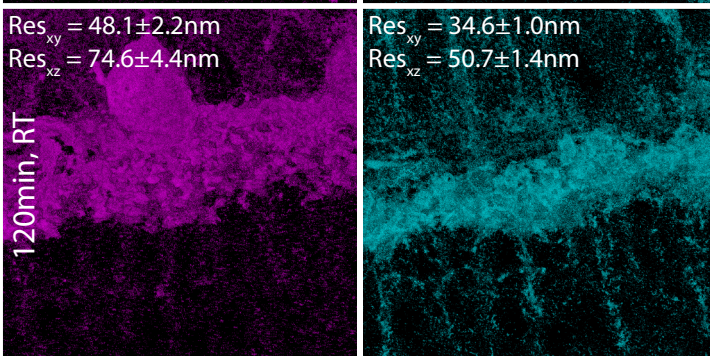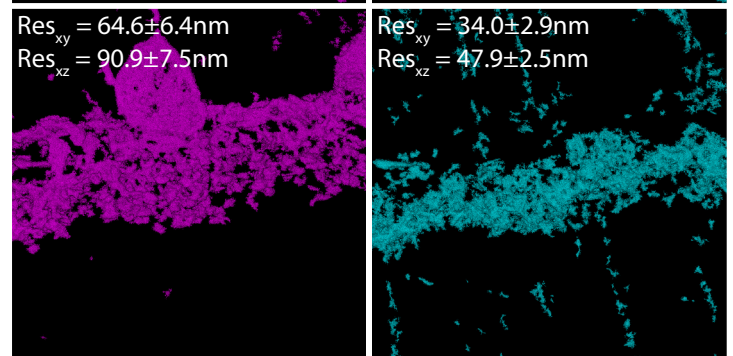



# Staining - Blocking, Time & Temperature

## Unprocessed

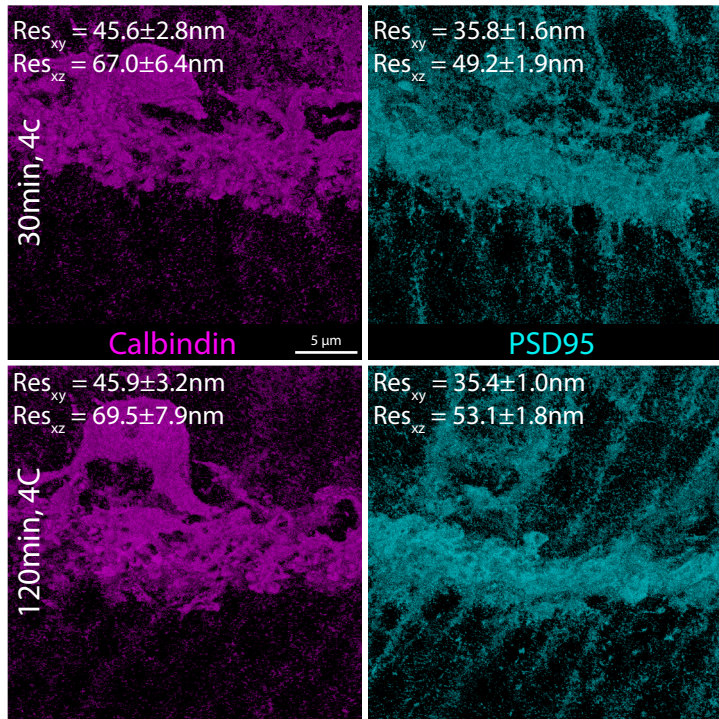

## Processed

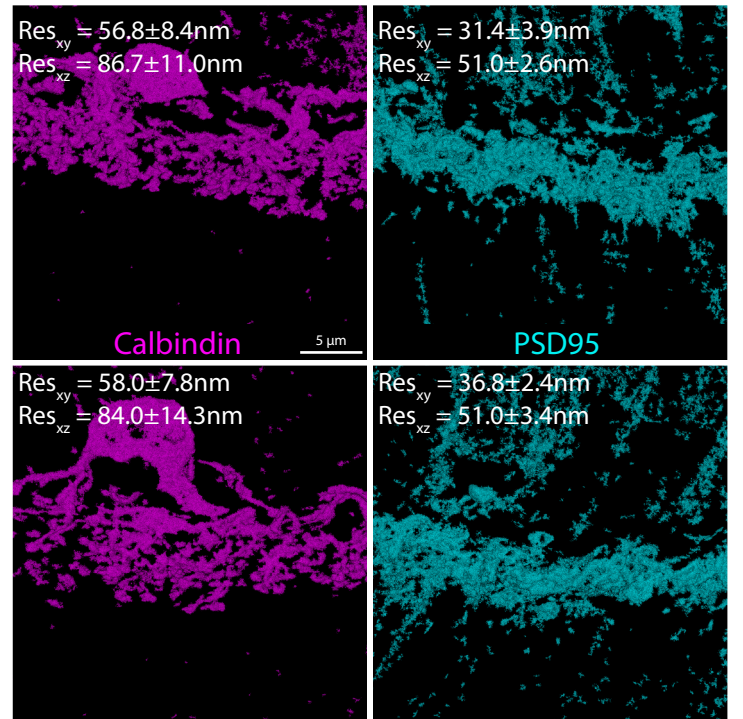

# Tissue Preparation - Primary Fixation, PFA Concentration

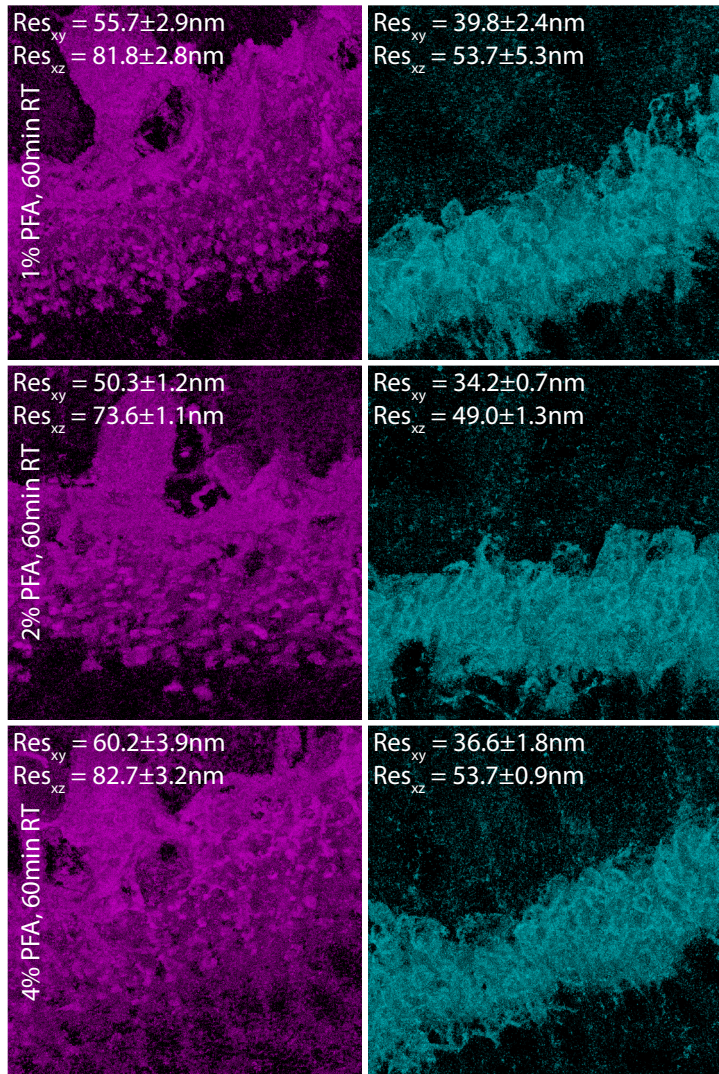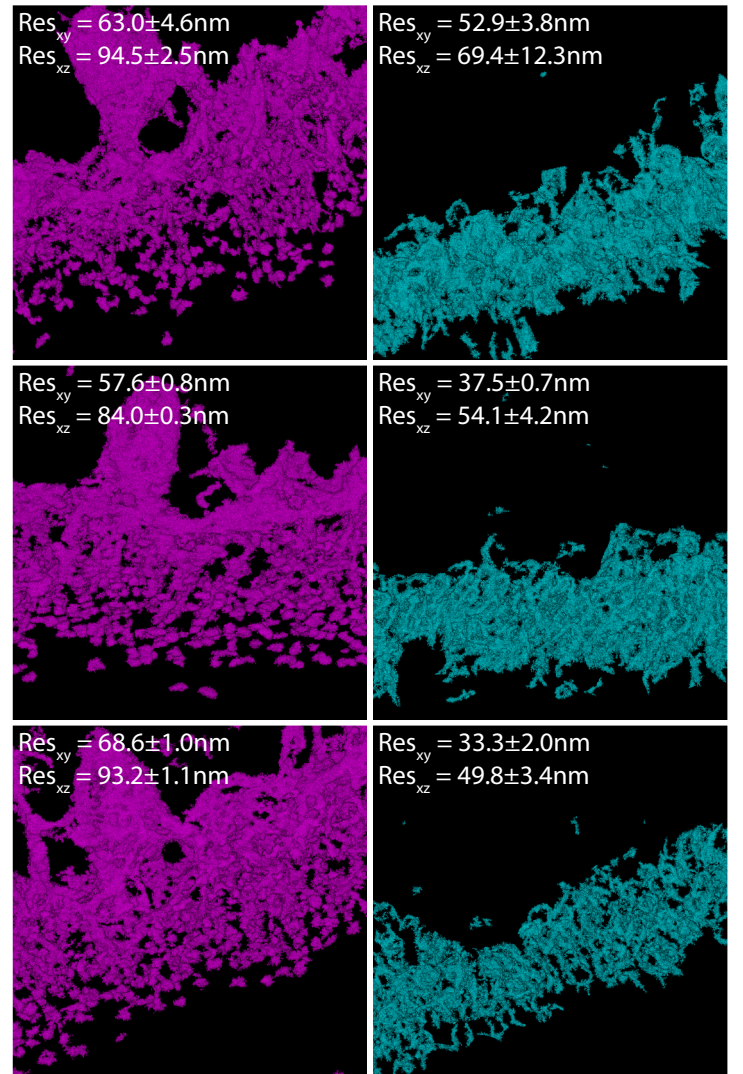



# Tissue Preparation - Primary Fixation, Temperature

## Unprocessed

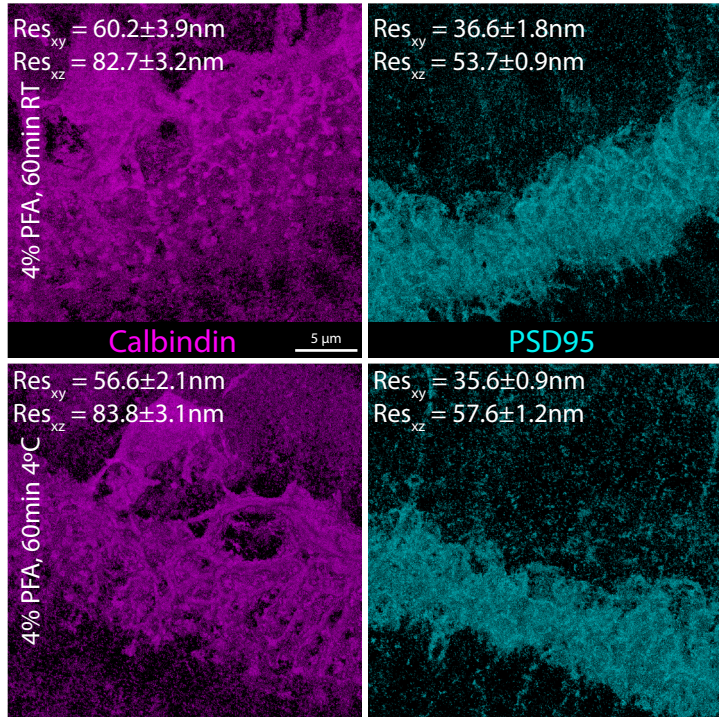

## Processed

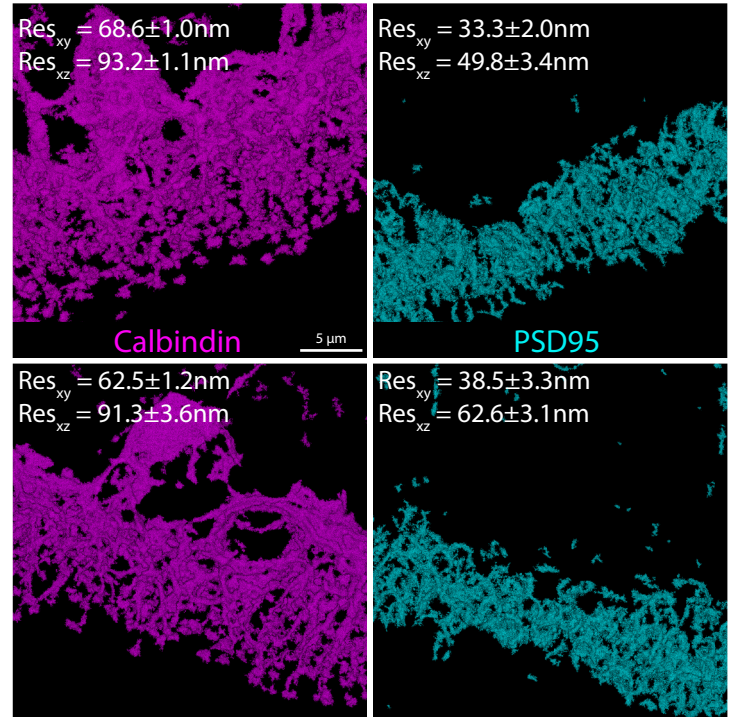

# Tissue Preparation - Primary Fixation, Time

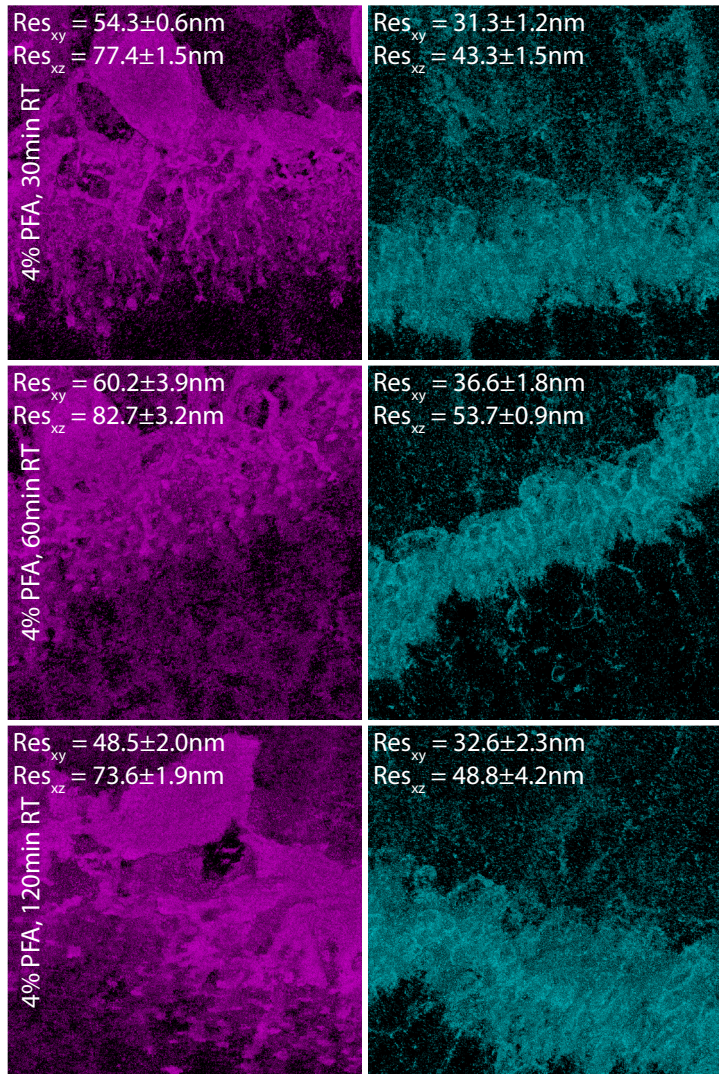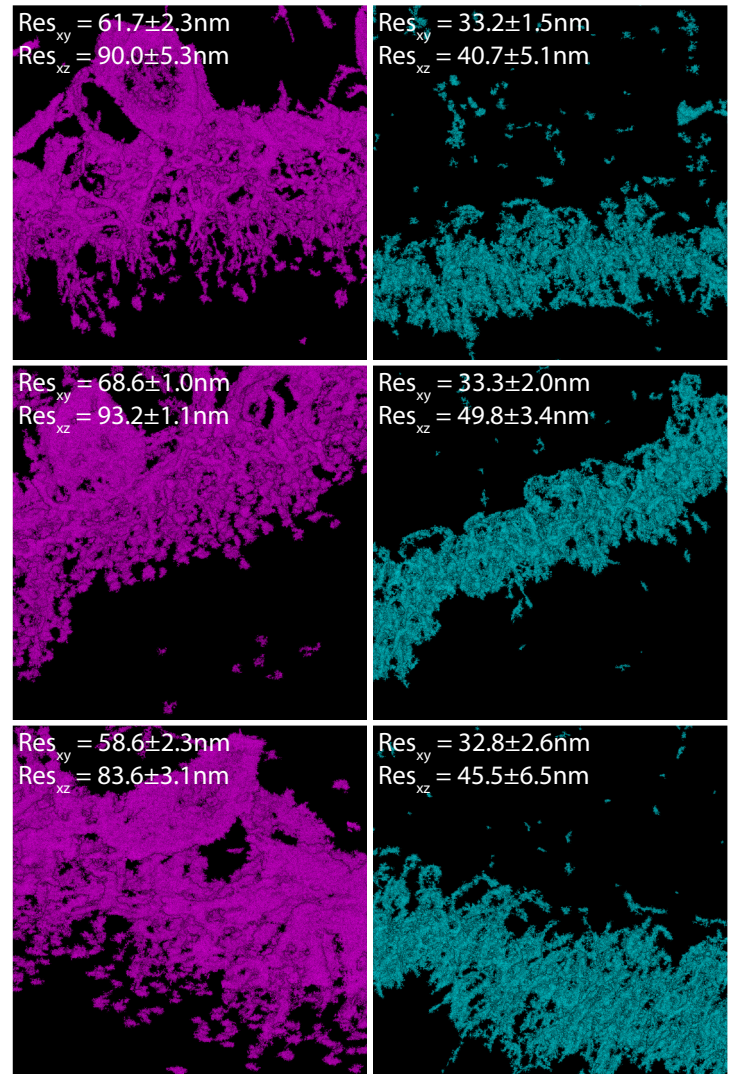



# Staining - Secondary Quenching, Concentration & Reagent

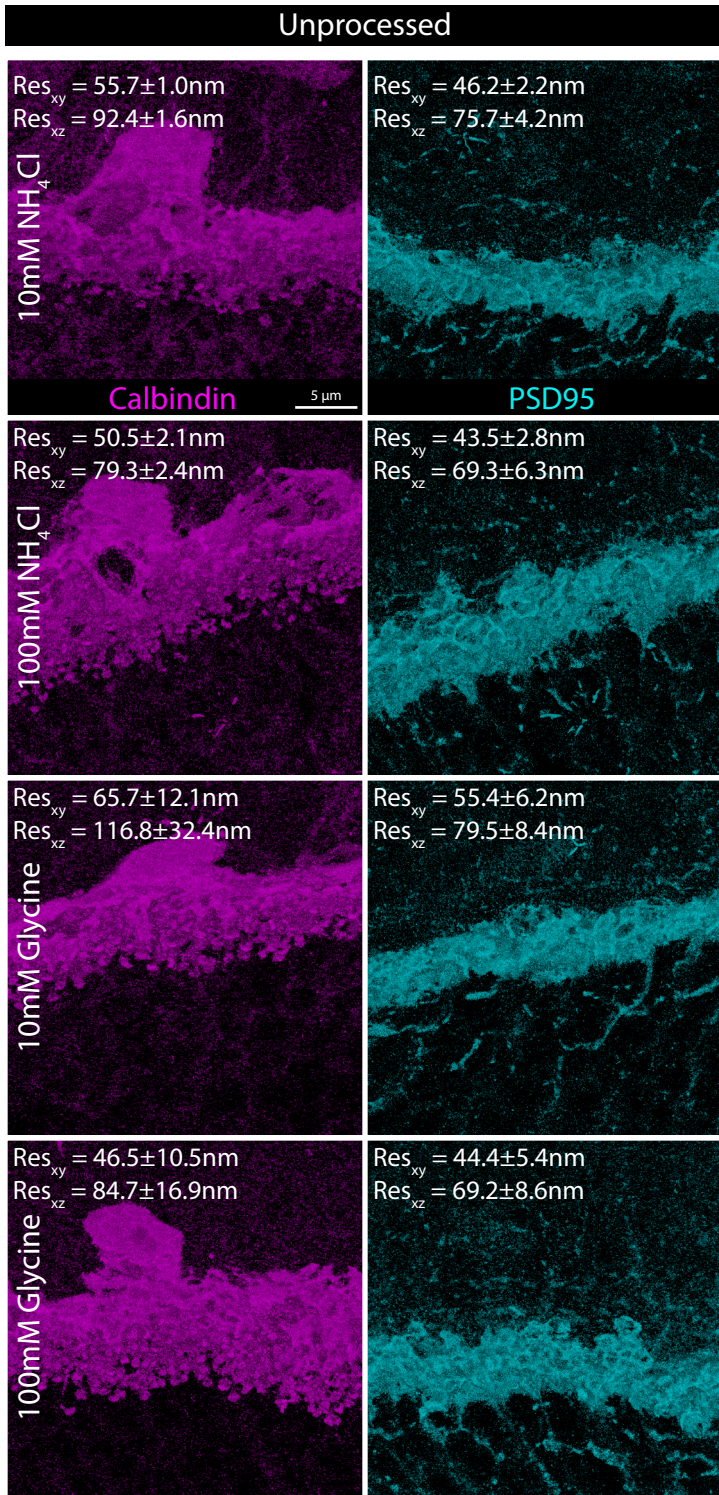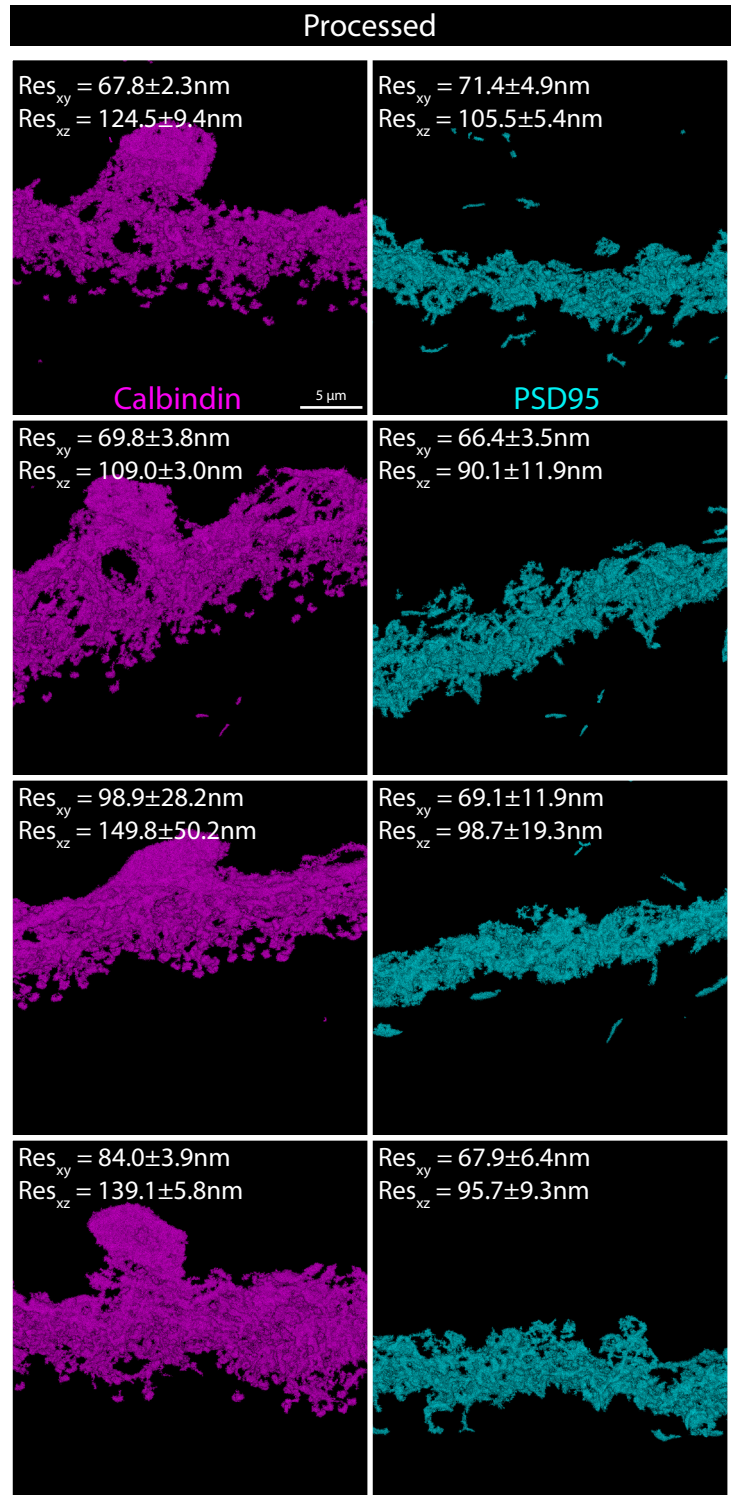

# Imaging - Electron Sinks, Concentration & Reagent

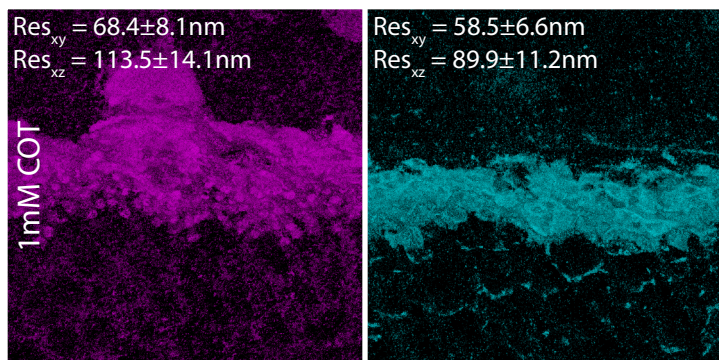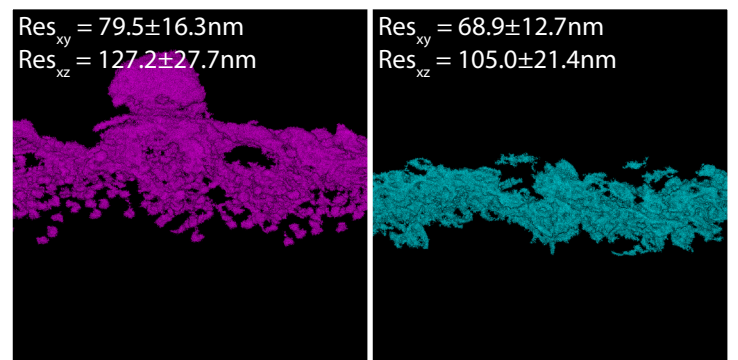



# Imaging - Electron Sinks, Concentration & Reagent

## Unprocessed

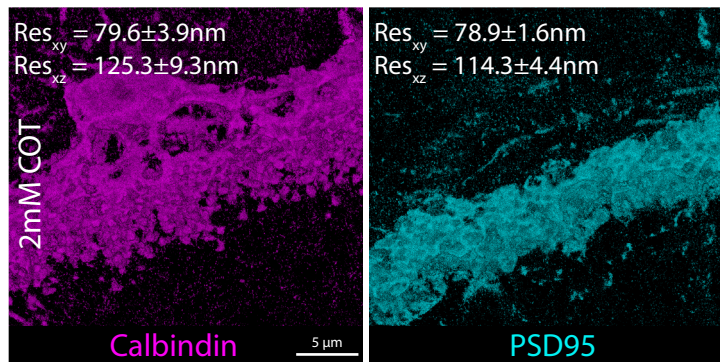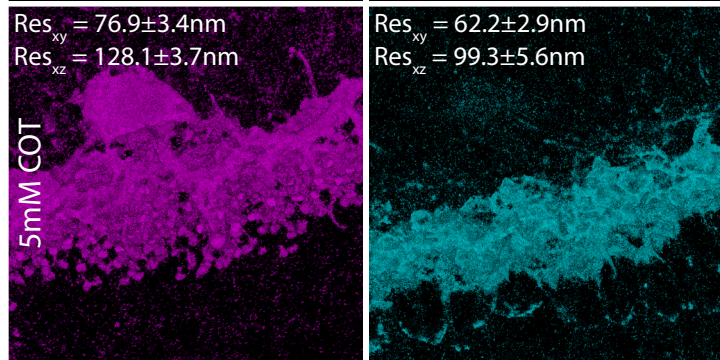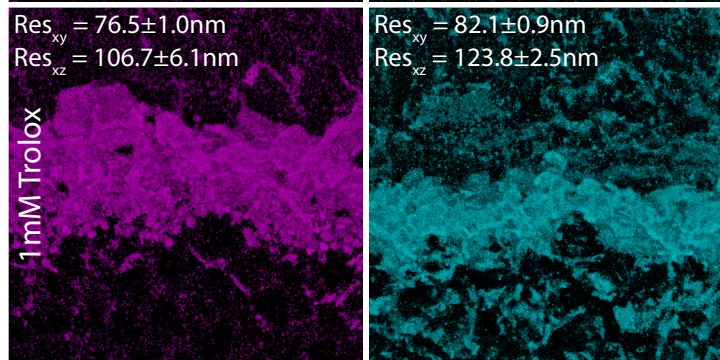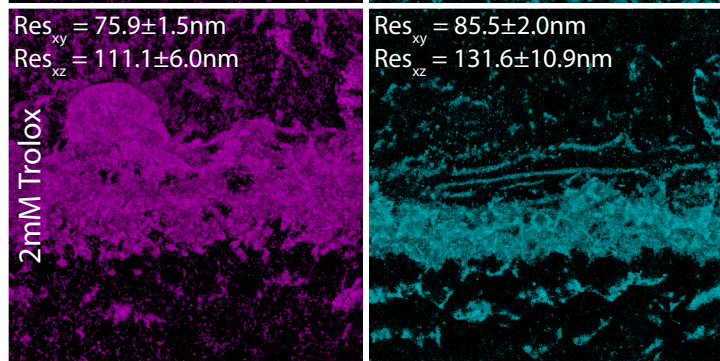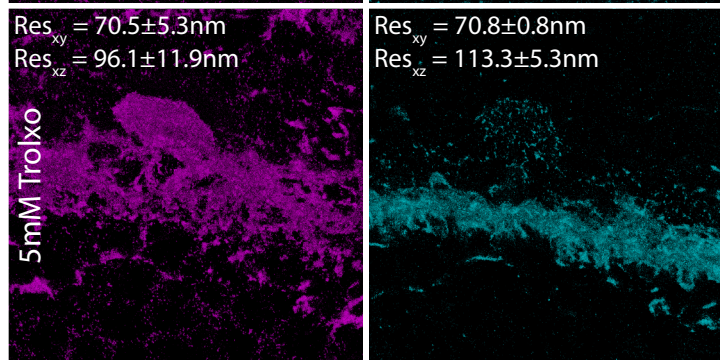

## Processed

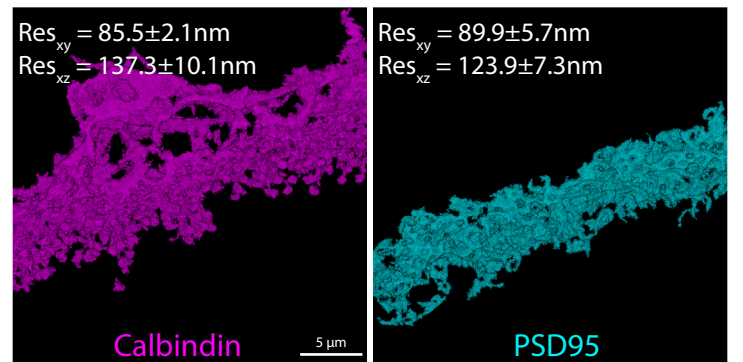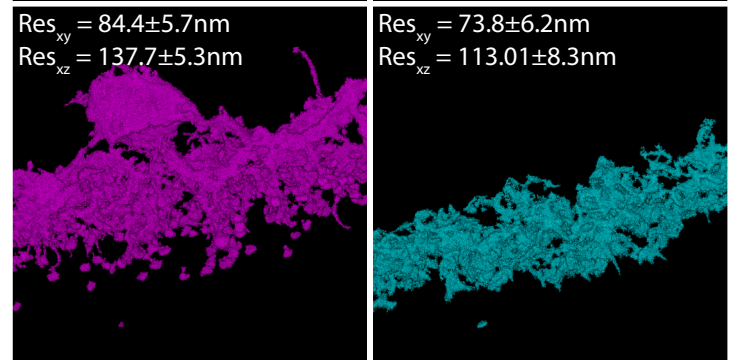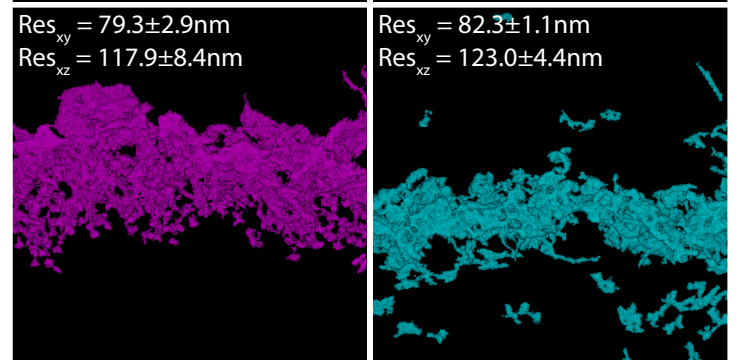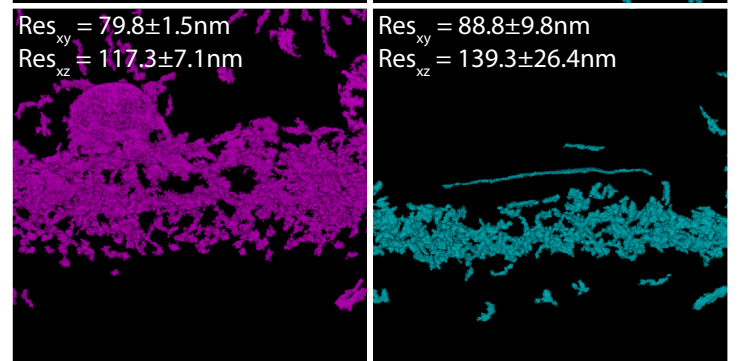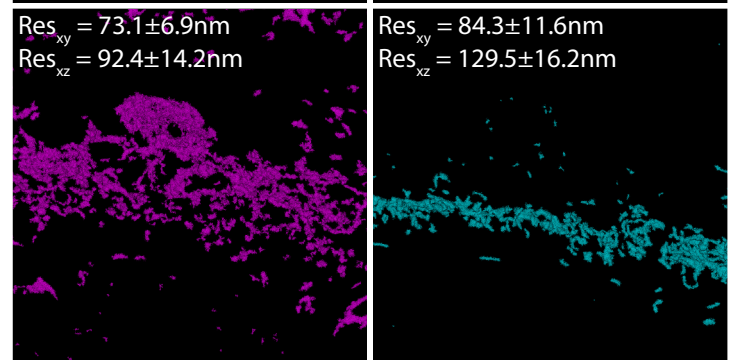



# Tissue Preparation-Primary Fixation & Quenching, Reagent & Conc.

## Unprocessed

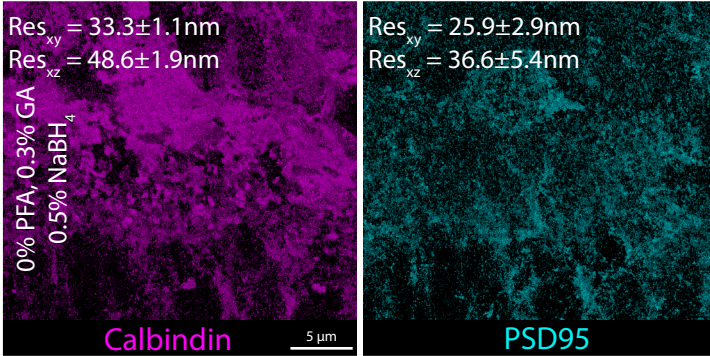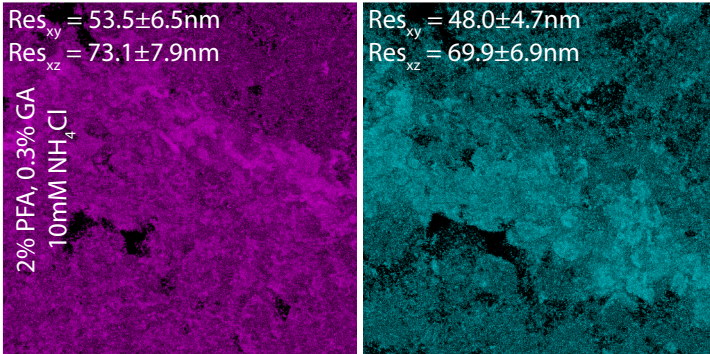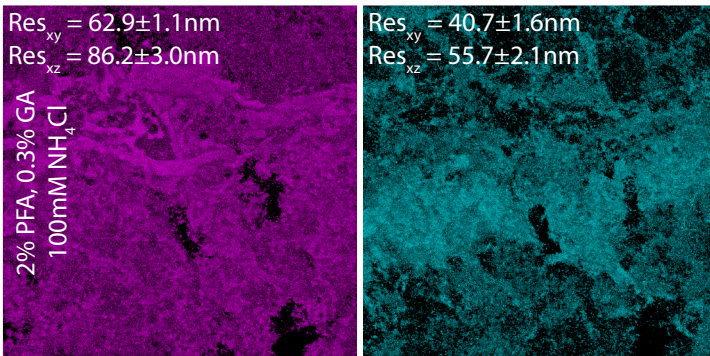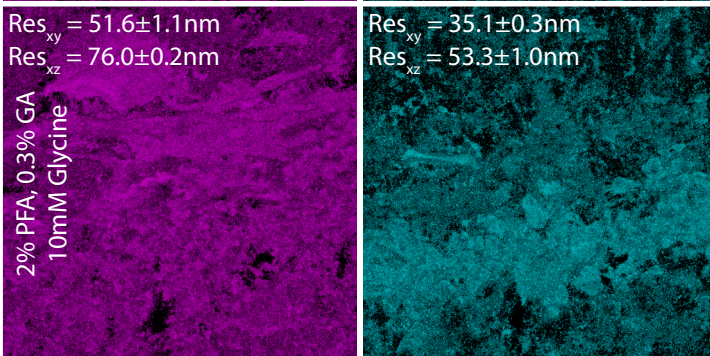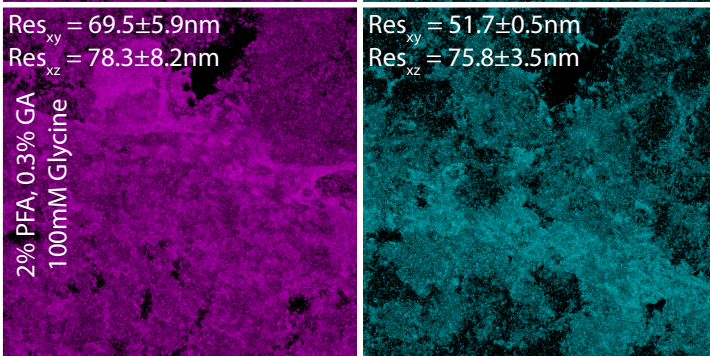

## Processed

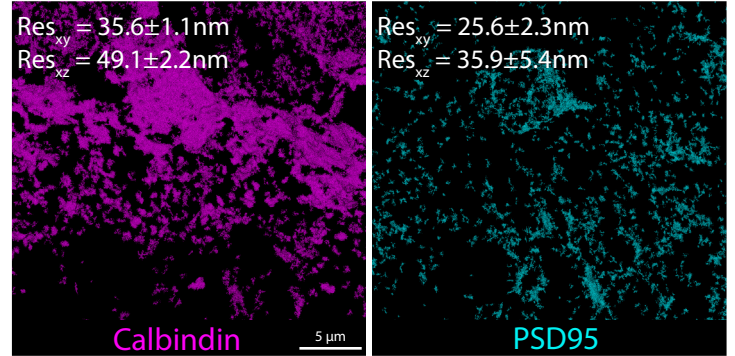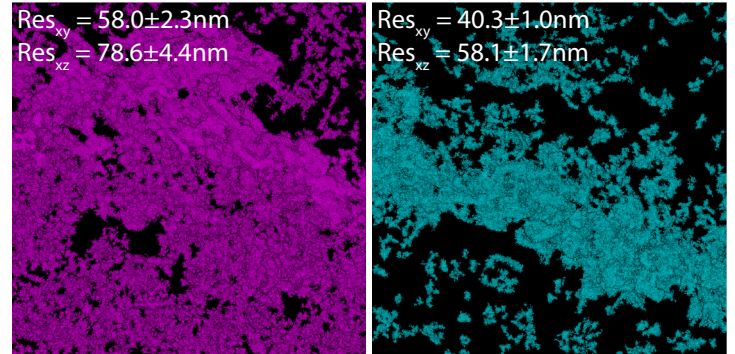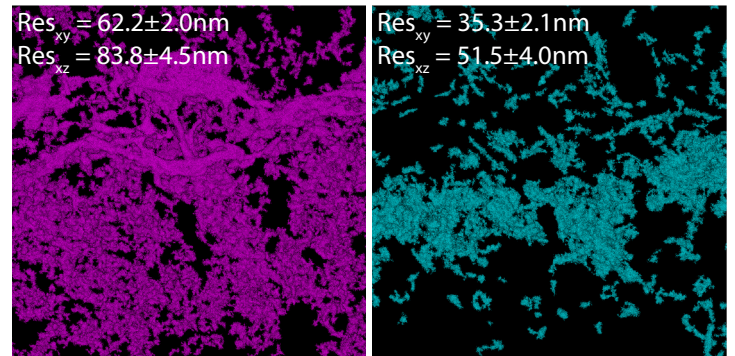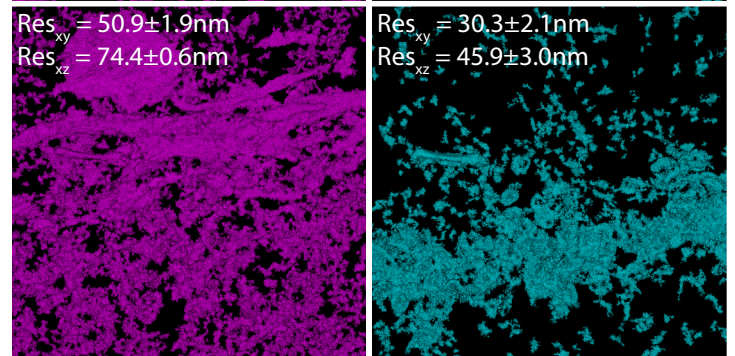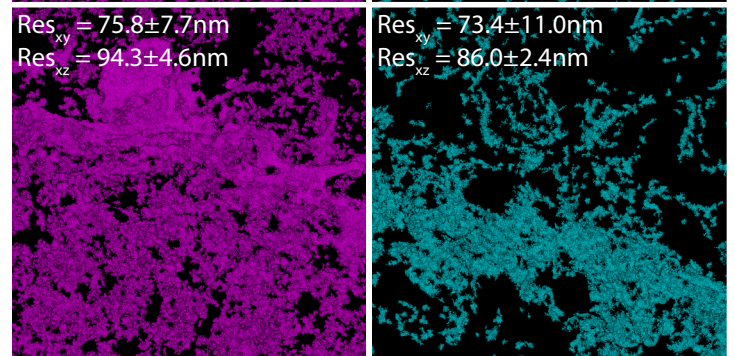



# Tissue Preparation-Primary Fixation & Quenching, Reagent & Conc.

## Unprocessed

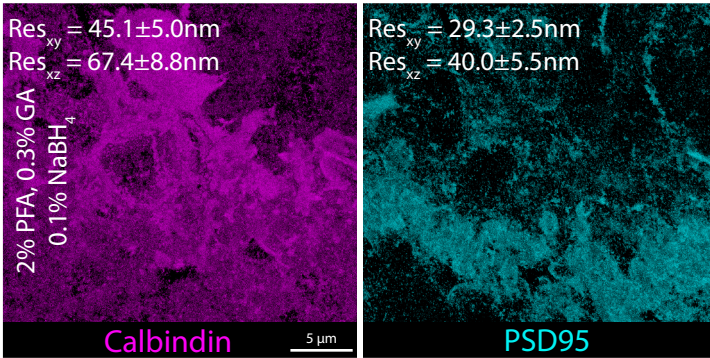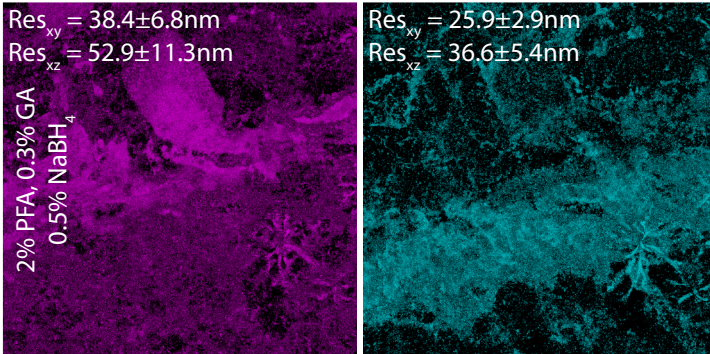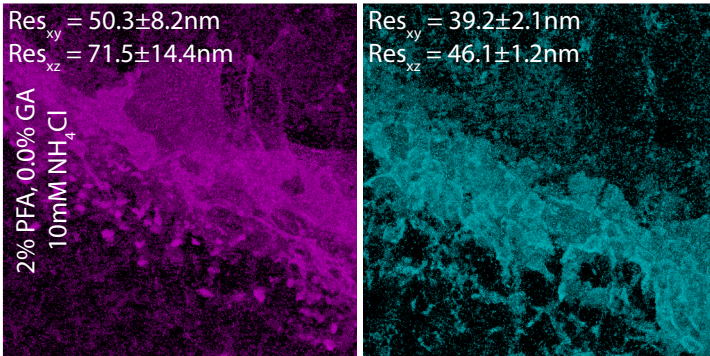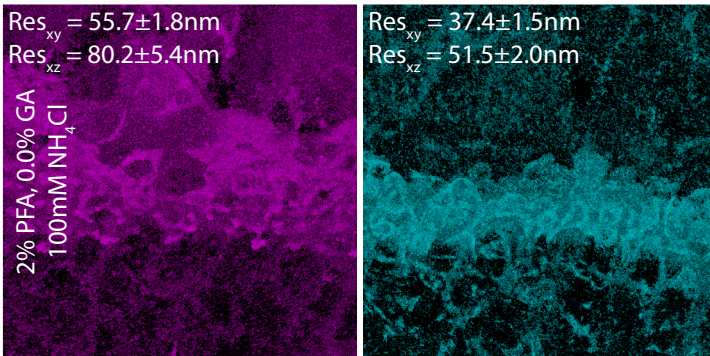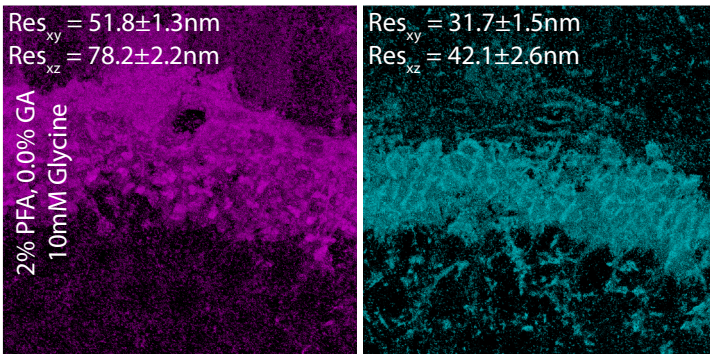

## Processed

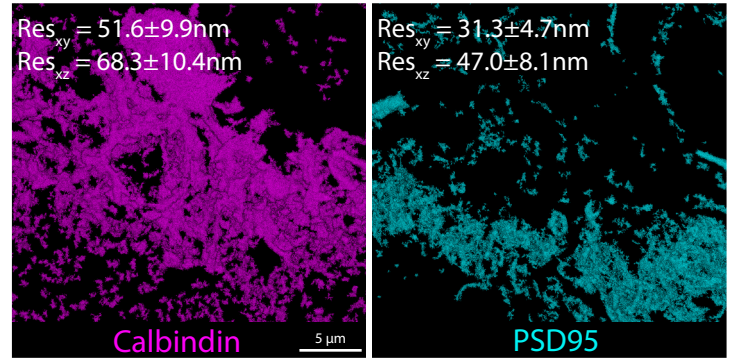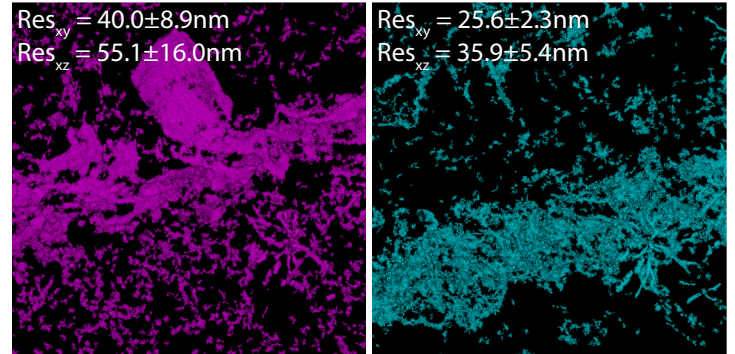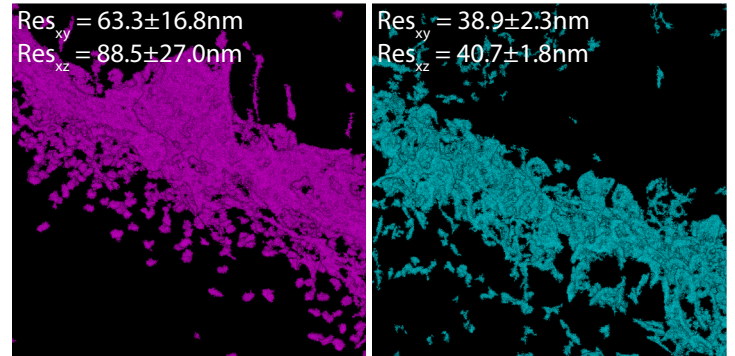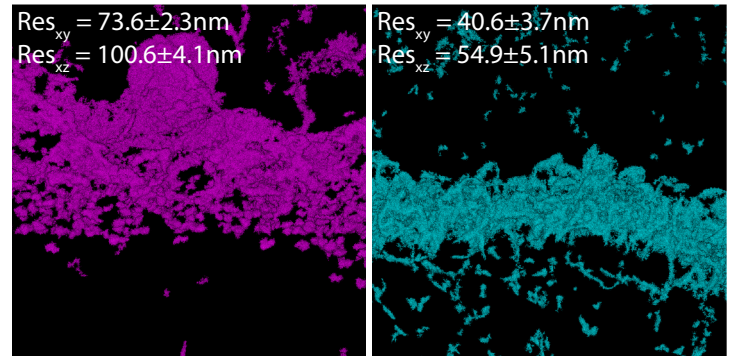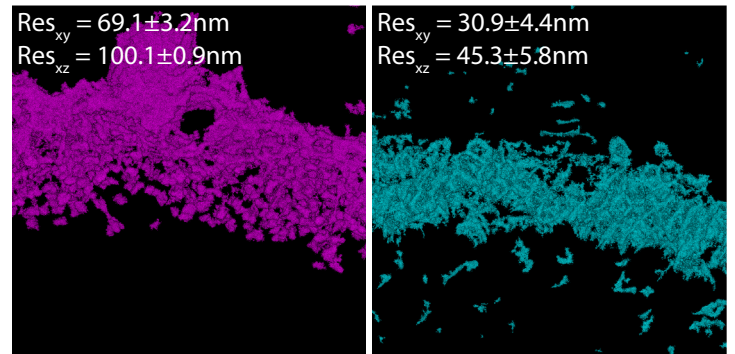



# Tissue Preparation-Primary Fixation & Quenching, Reagent & Conc.

## Unprocessed

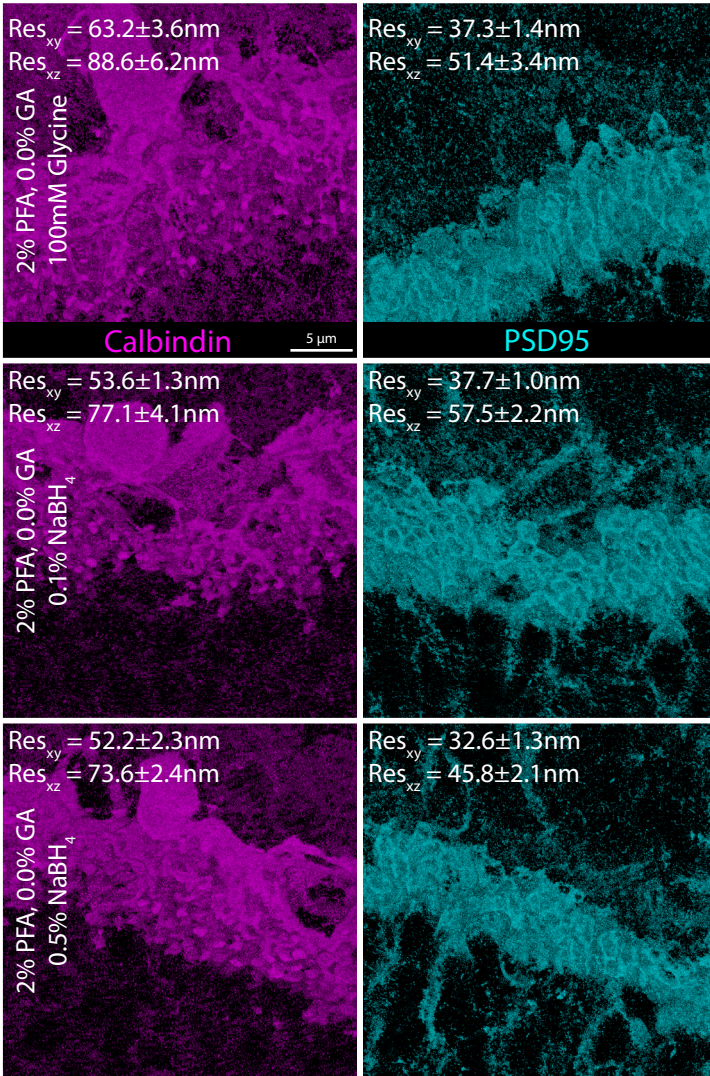

## Processed

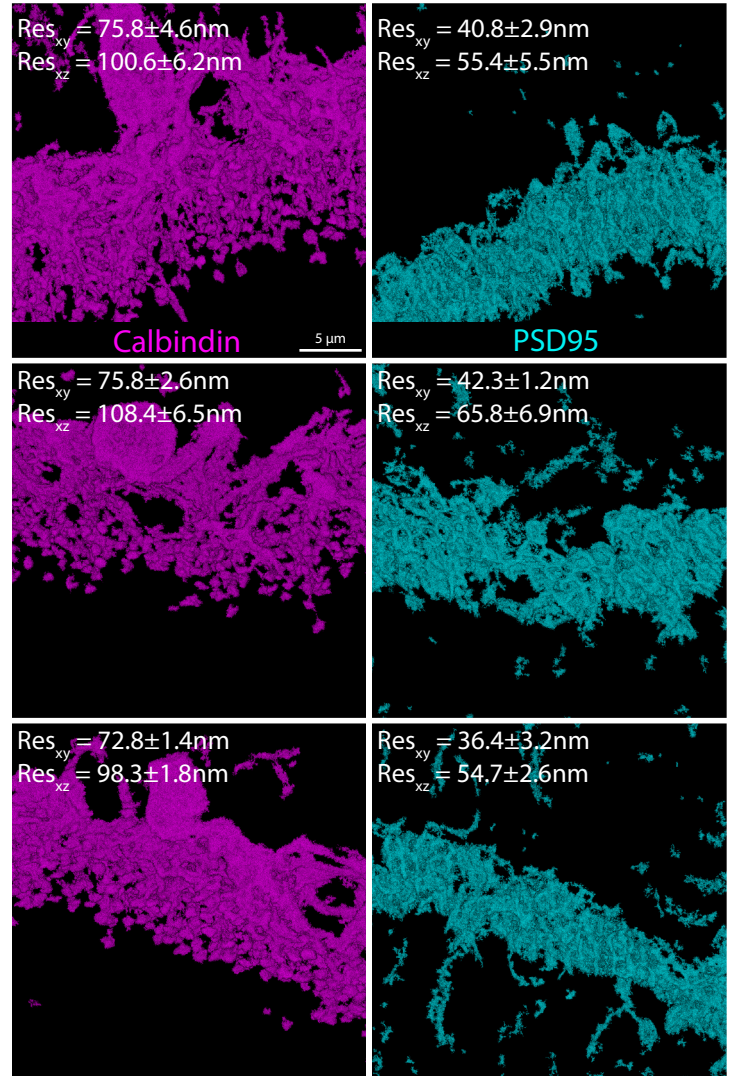

# Staining - Secondary, Channel & Primary Target

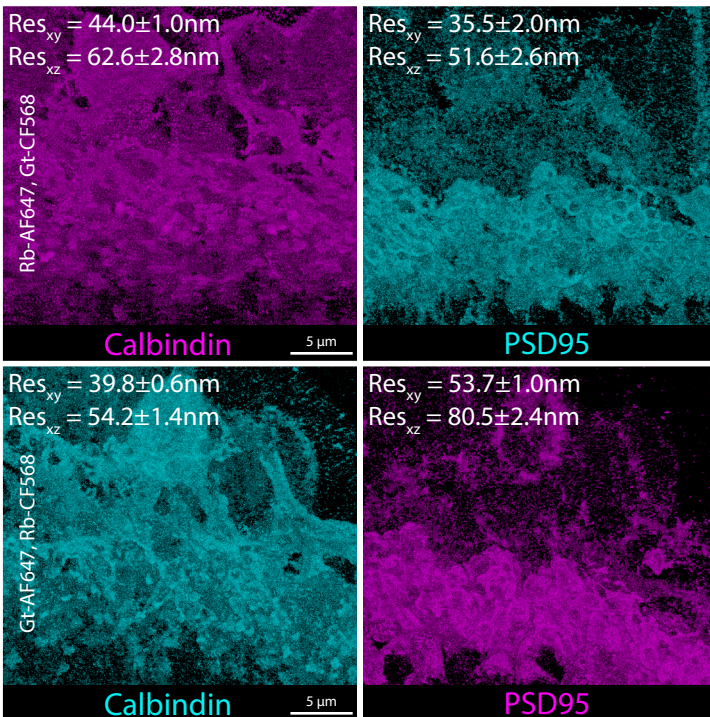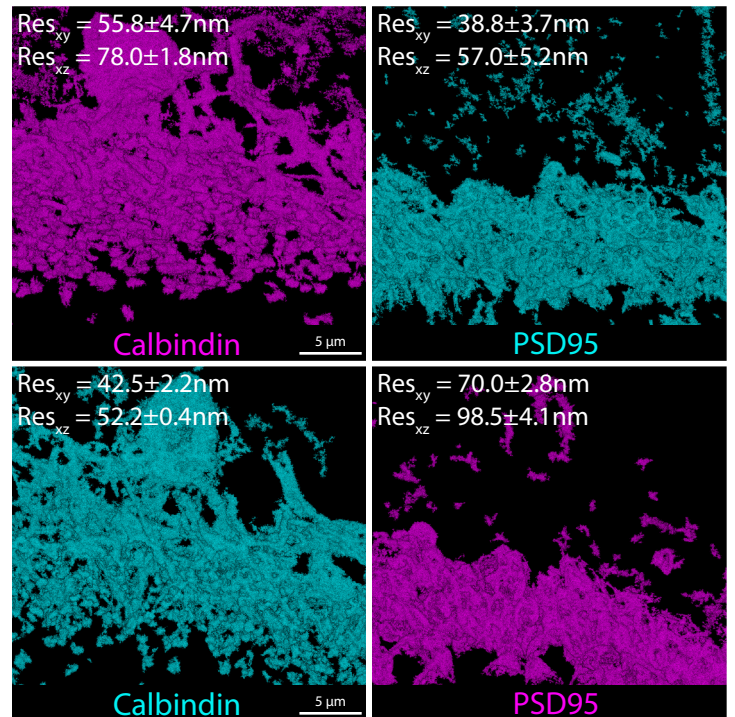



# Tissue Preparation-Primary Fixation & Quenching, Reagent & Conc.

## Unprocessed

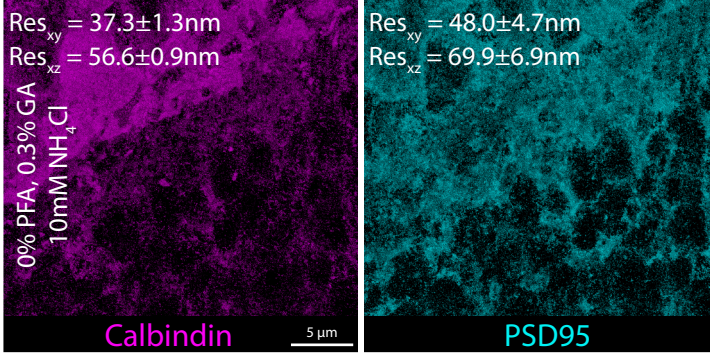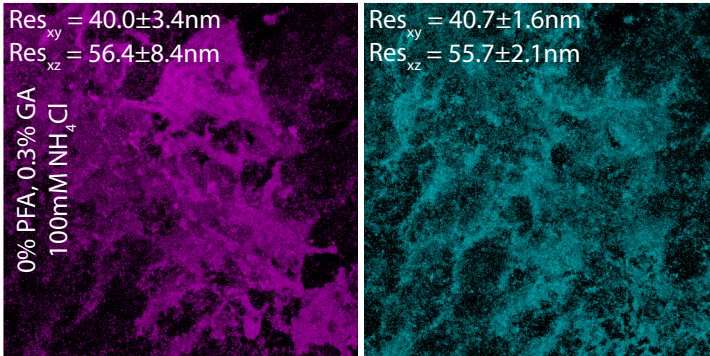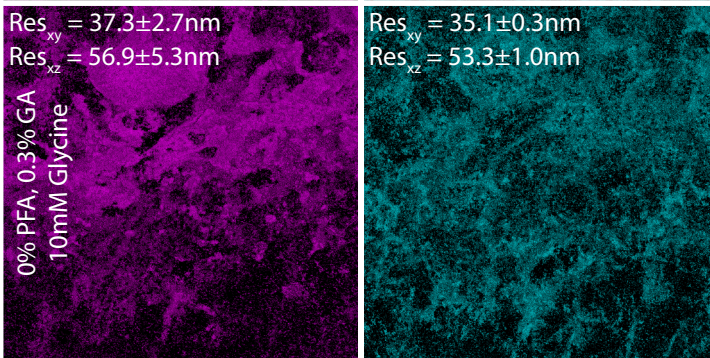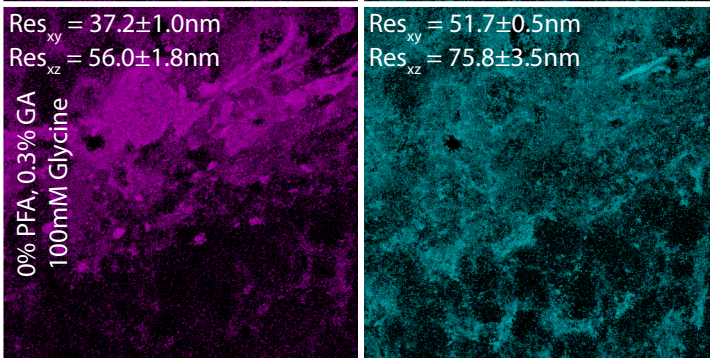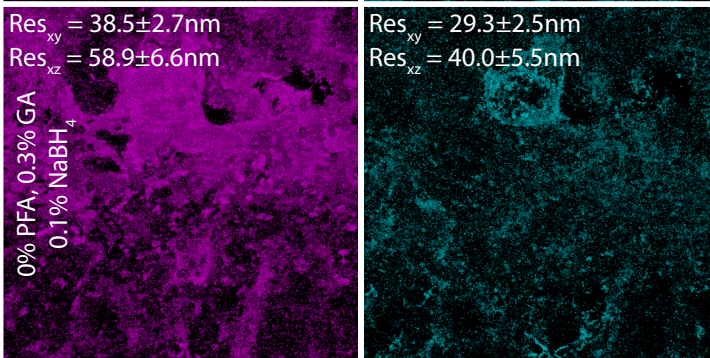

## Processed

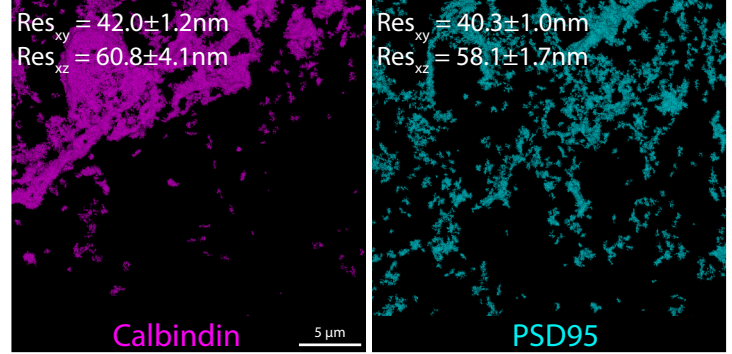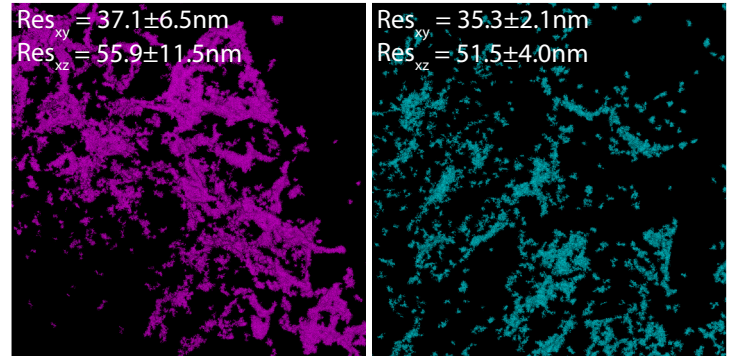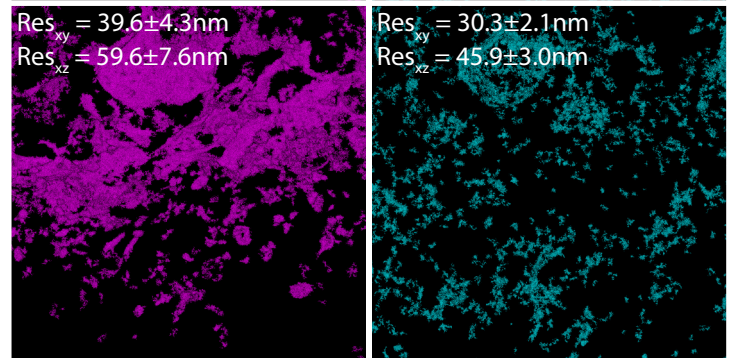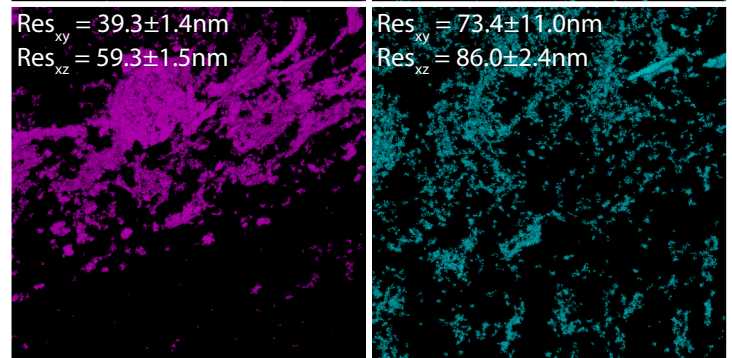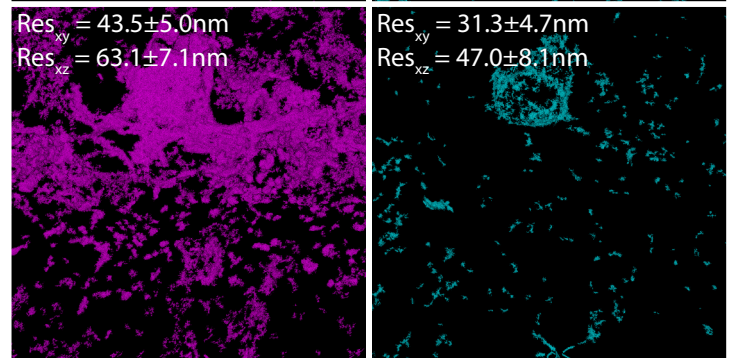



# Imaging & Analysis - Imaging Buffer, Pyranose Oxidase Buffer

## Unprocessed

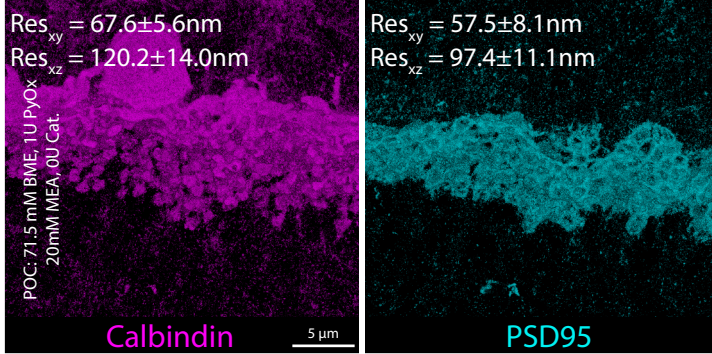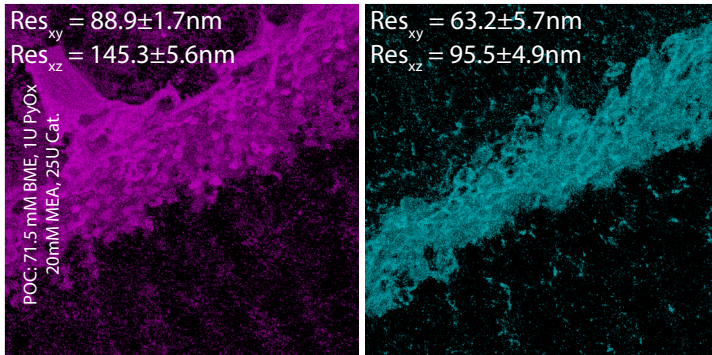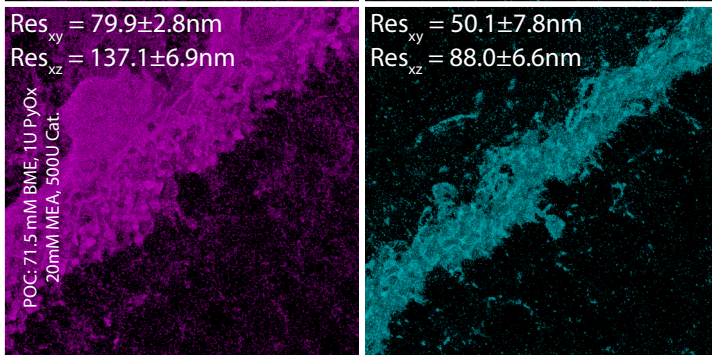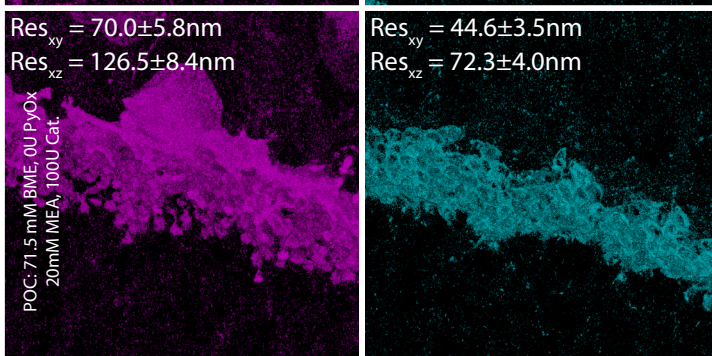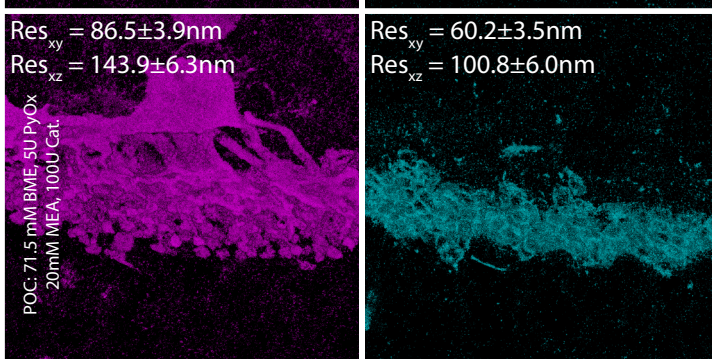

## Processed

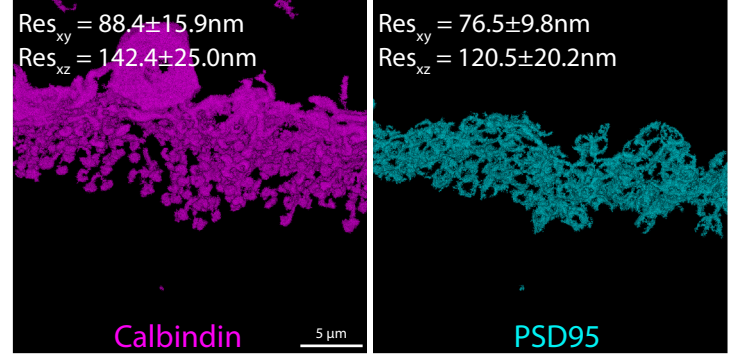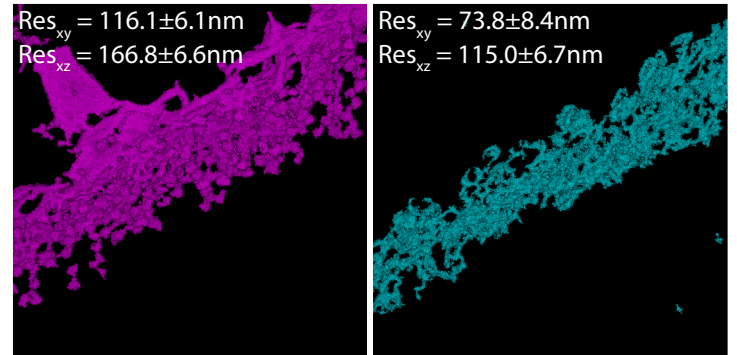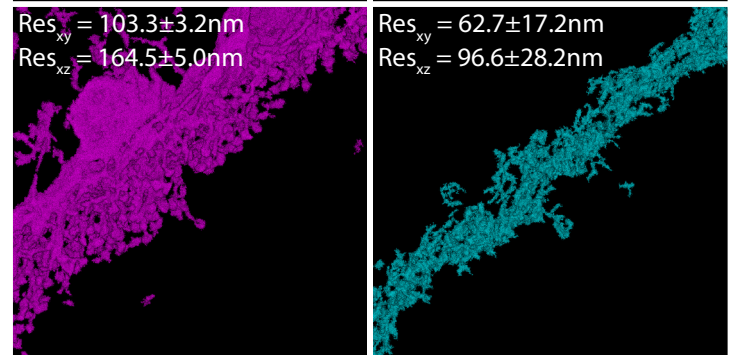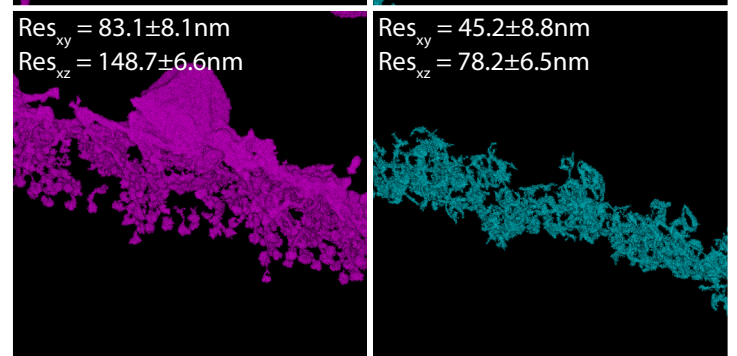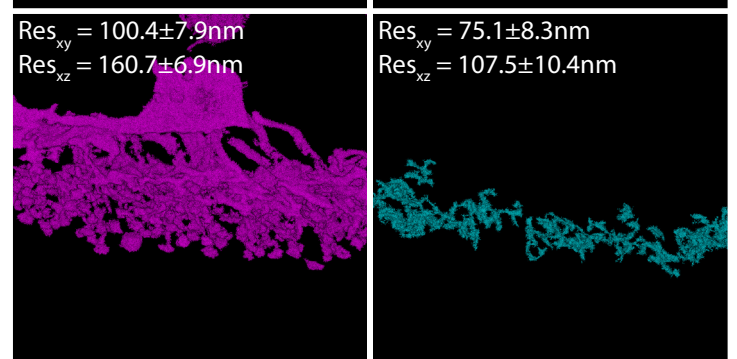



# Imaging & Analysis - Imaging Buffer, Pyranose Oxidase Buffer

## Unprocessed

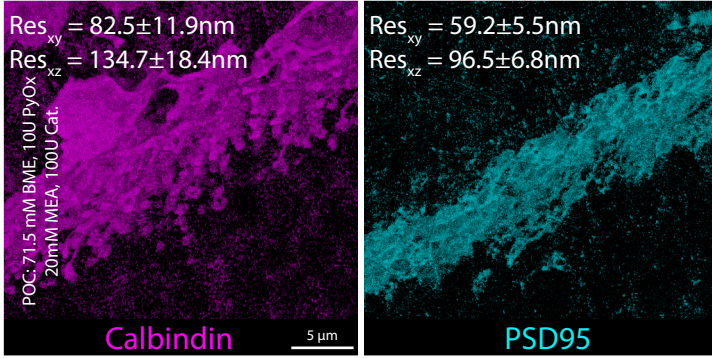

## Processed

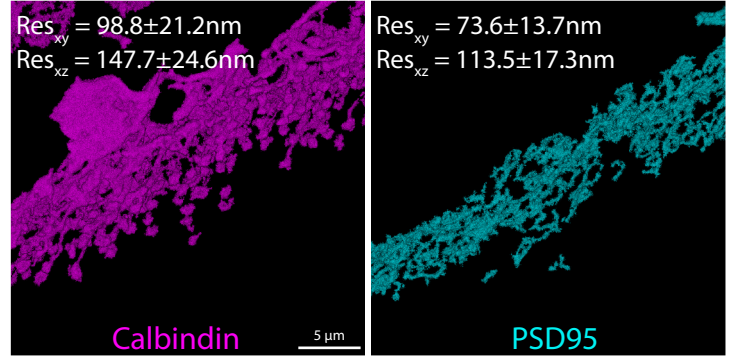

# Imaging & Analysis - Image Acquisition, Step Size

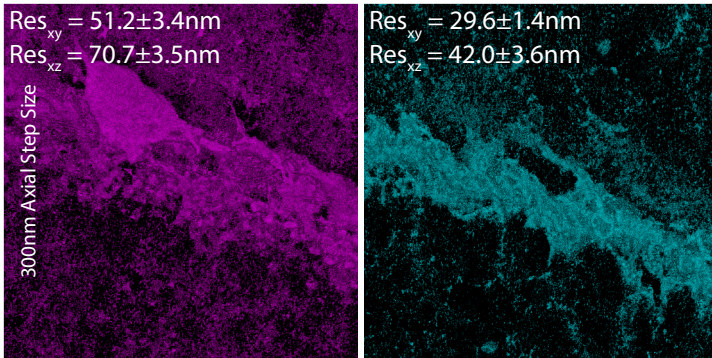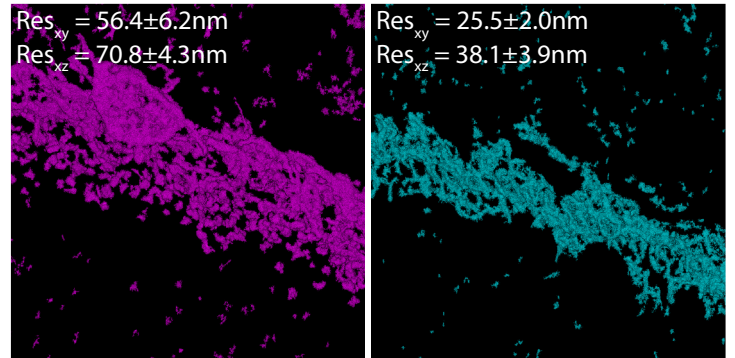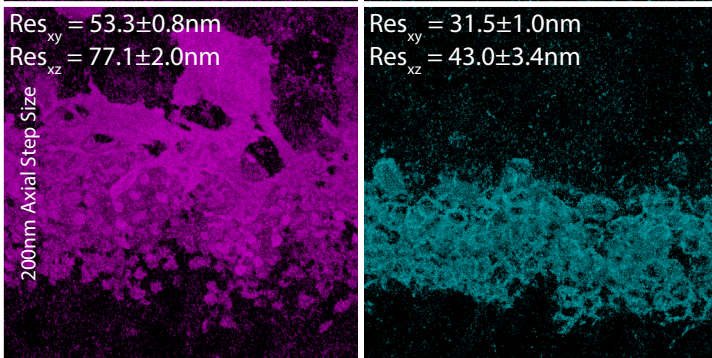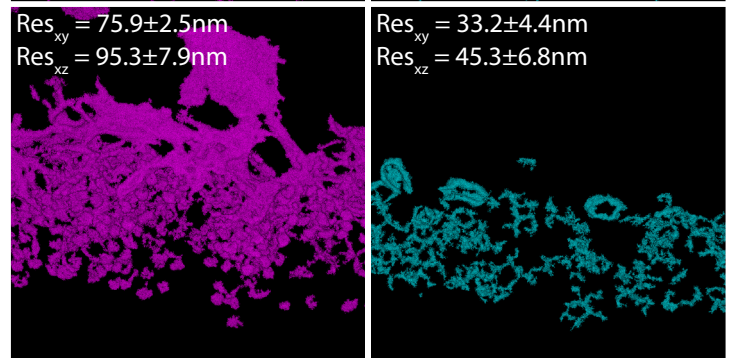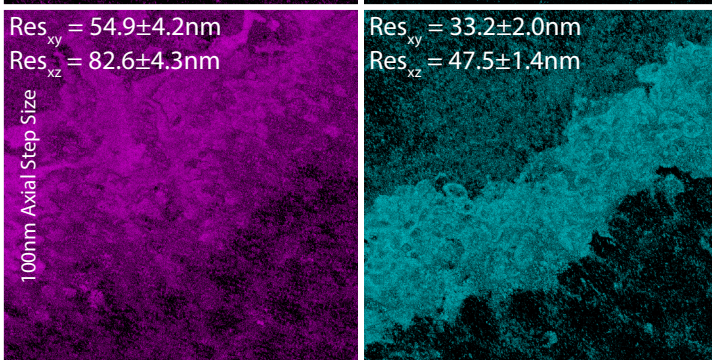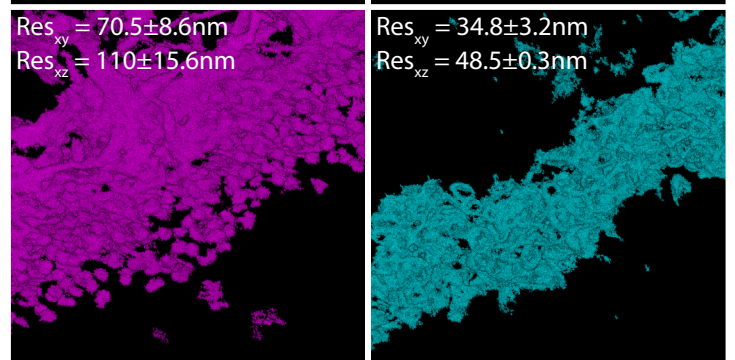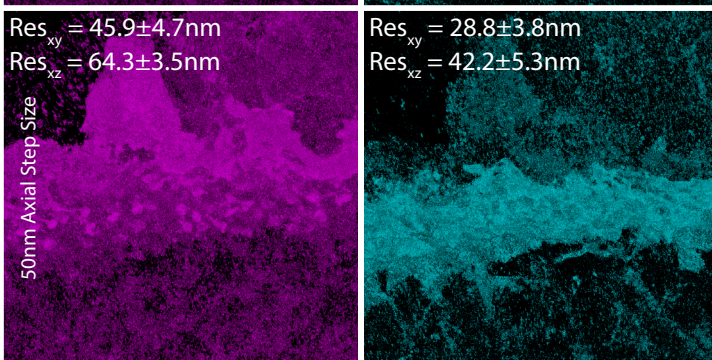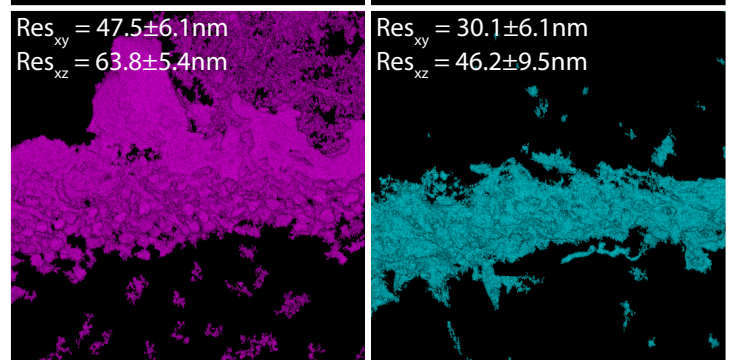



# Staining- Secondary, Labeling Density

## Unprocessed

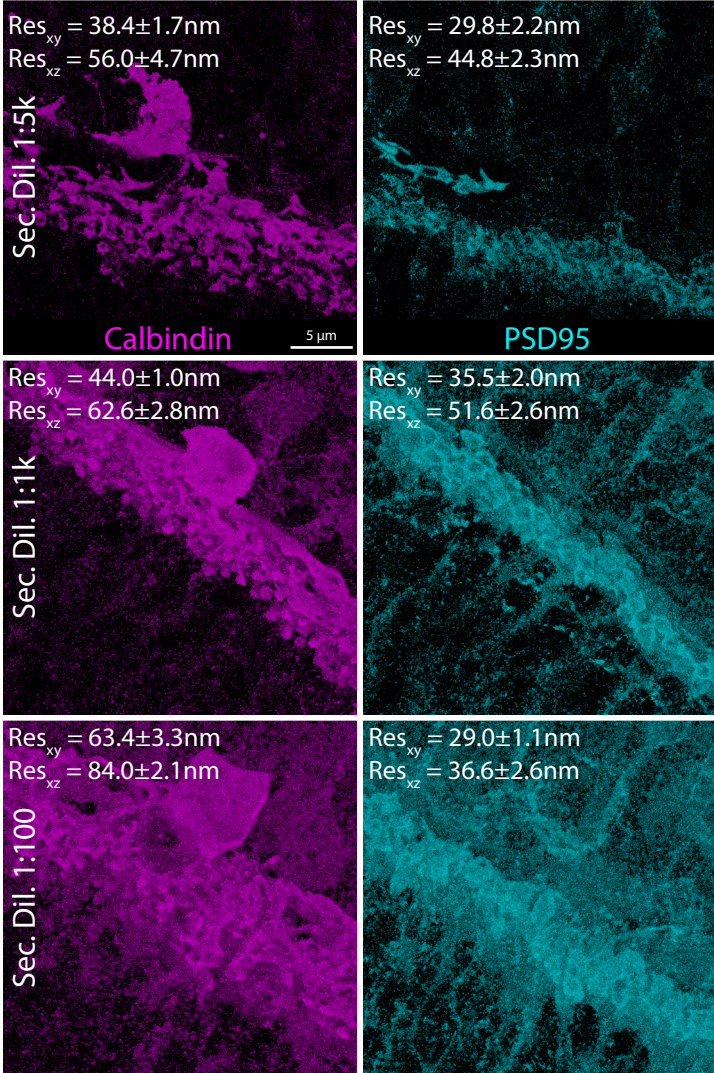

## Processed

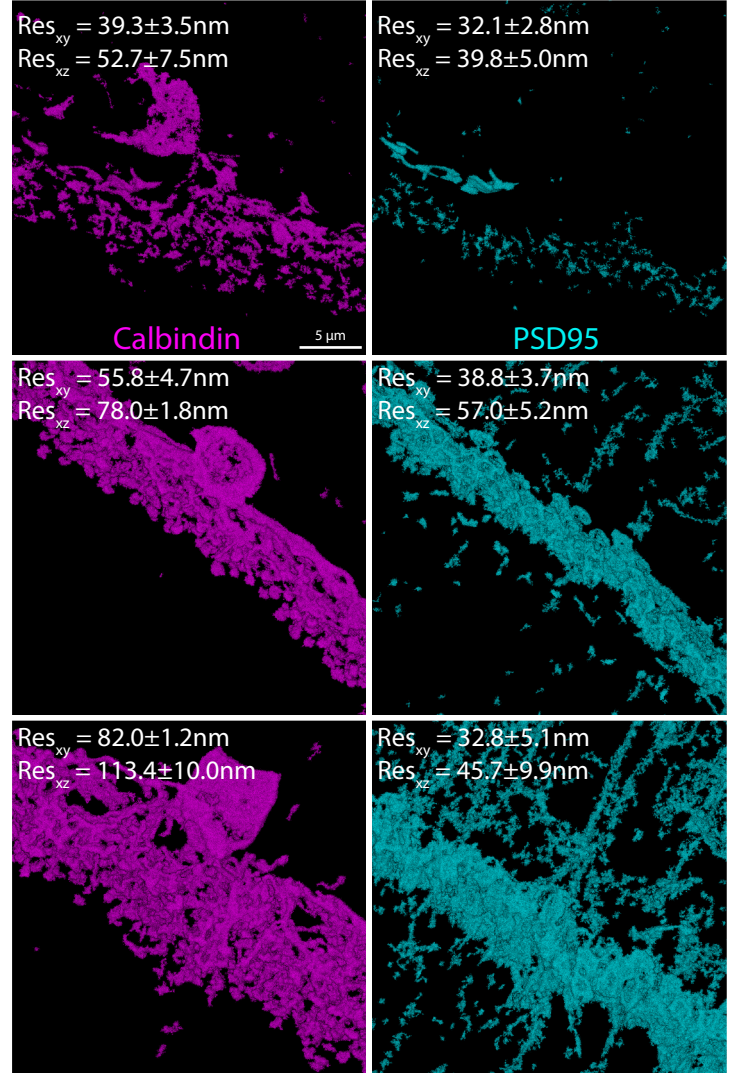

# Imaging & Analysis - Imaging Buffer, Pyranose Oxidase Buffer

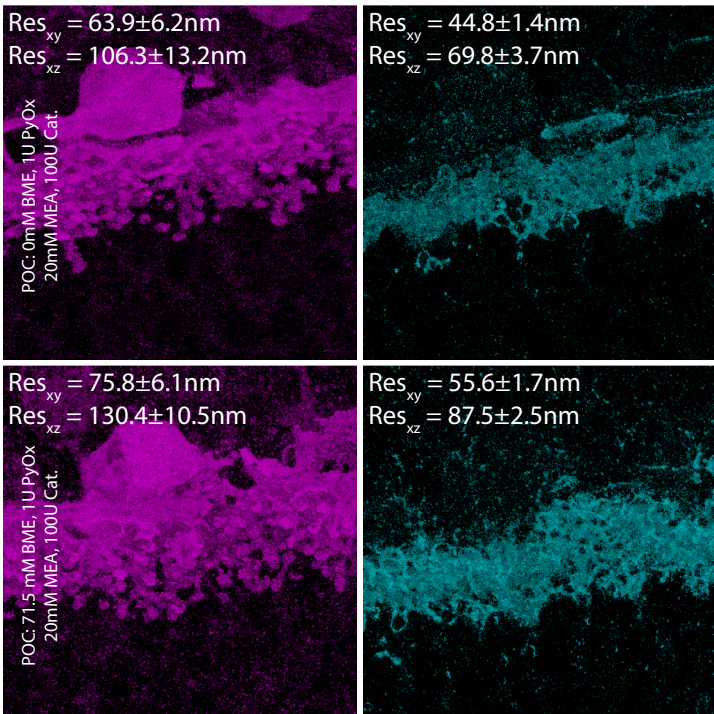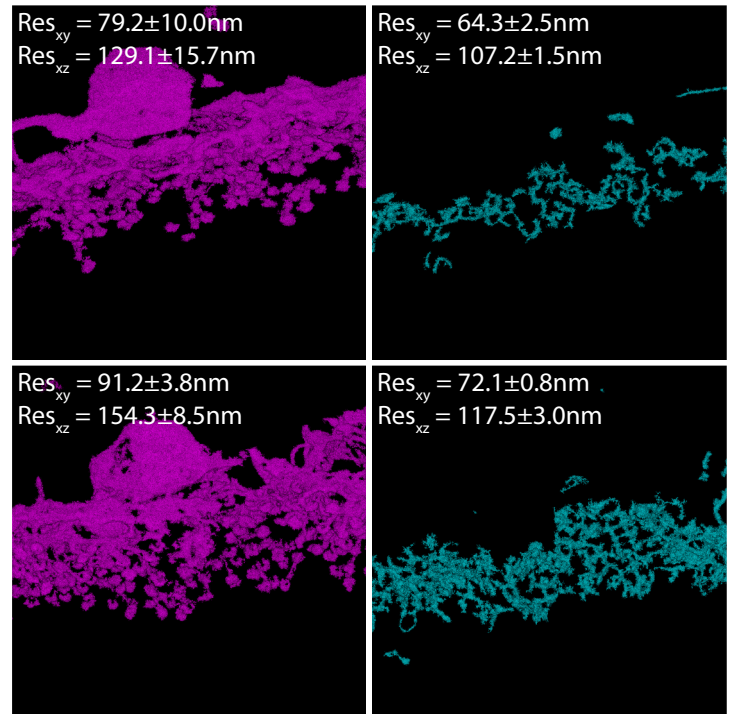



# Imaging & Analysis - Imaging Buffer, Pyranose Oxidase Buffer

## Unprocessed

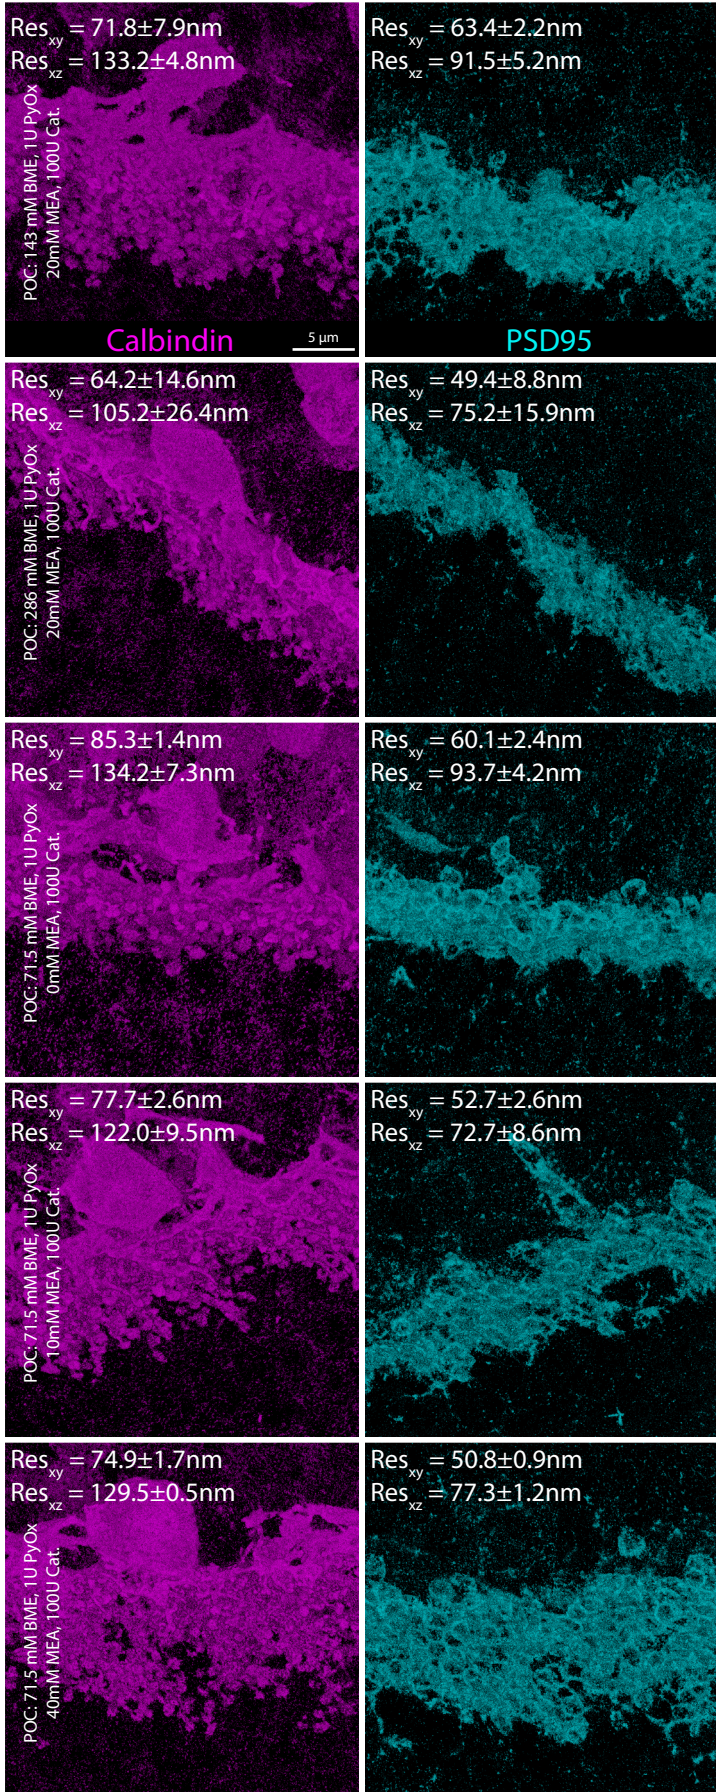

## Processed

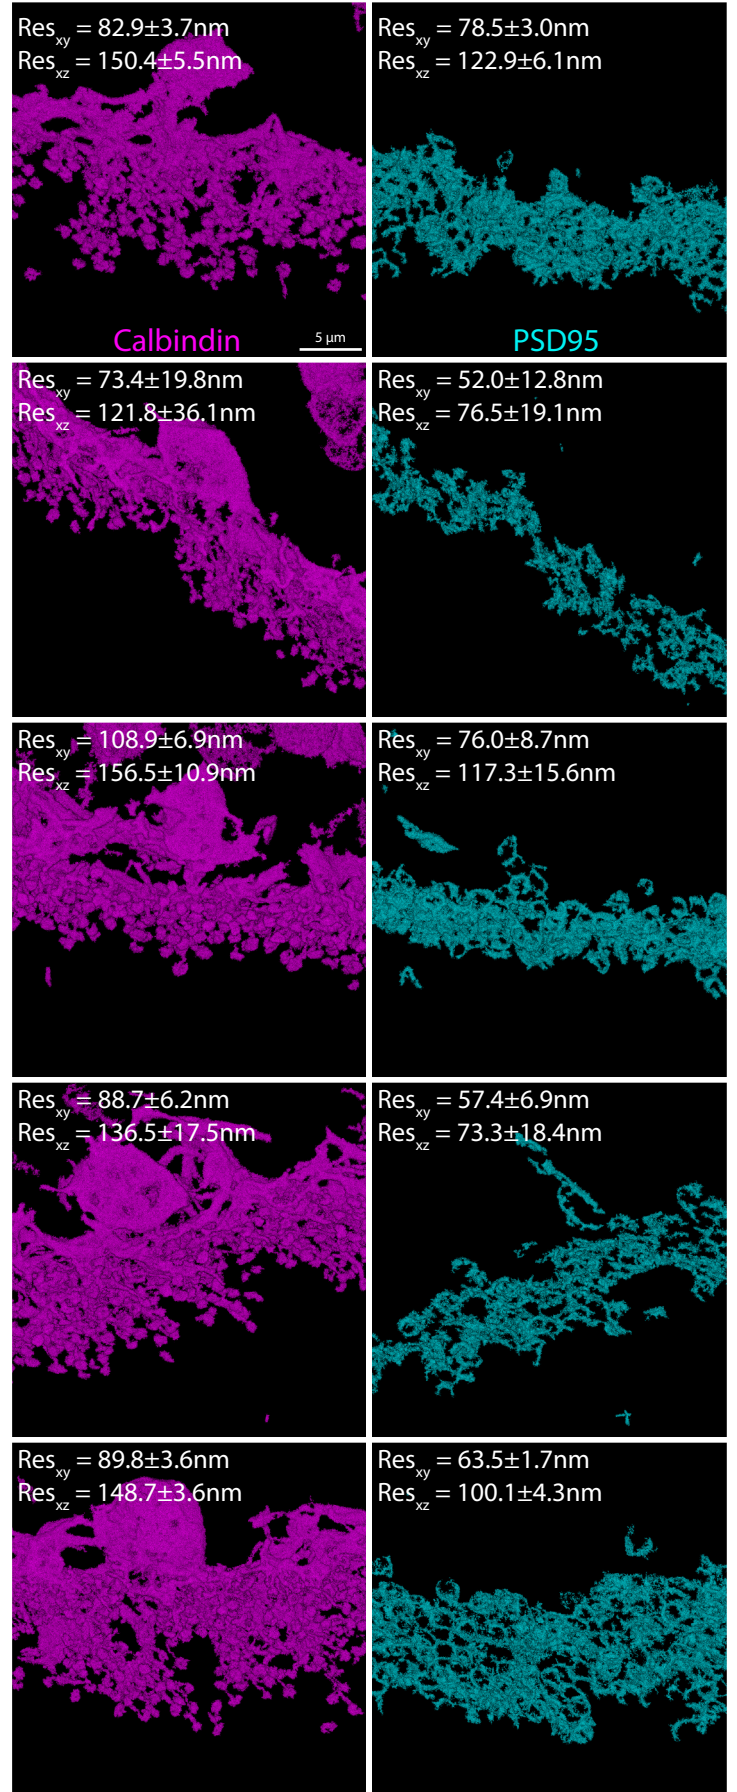

**Data S1. Sample and imaging conditions affect image quality and metrics, related to Figure 4.**

Representative images of conditions are shown for each channel of a given condition. Unprocessed images are shown alongside their processed counterparts, as well as the resolutions that were measured for each condition. Each row shows a different condition tested. Calbindin-labeled horizontal cells are shown in magenta, and PSD95-labeled rod terminals in cyan, unless otherwise noted. Scale bars = 5  $\mu\text{m}$ .

**Supplemental Table 1: Primary antibodies used.**

| Antigen                                    | Labeling specificity                                                         | Source                                          | Dilution (confocal) | Dilution (RAIN-STORM) |
|--------------------------------------------|------------------------------------------------------------------------------|-------------------------------------------------|---------------------|-----------------------|
| Calbindin D-28K                            | Horizontal cells, subsets of amacrine cells, and retinal ganglion cells      | Swant, Cat# CB38a, RRID: AB_10000340            | 1:5000              | 1:1000                |
| CD31                                       | Blood vessels, endothelial cells                                             | Fisher, Cat# BDB5500274, RRID: AB_393571        | 1:200               | 1:50                  |
| Cone arrestin                              | Cone photoreceptors                                                          | Millipore, Cat# AB15282, RRID: AB_11210270      | 1:2000              | 1:1000                |
| Collagen IV                                | Blood vessels                                                                | Millipore, Cat# AB769, RRID: AB_92262           | 1:1000              | 1:500                 |
| Connexin 43                                | Pericyte gap junctions                                                       | Sigma, Cat#C6219, RRID: AB_476857               | 1:1000              | 1:500                 |
| Desmin                                     | Pericytes                                                                    | Thermo Fisher, Cat# MA513259, RRID: AB_11000611 | 1:500               | 1:500                 |
| Dystrophin                                 | Photoreceptor synapses                                                       | Abcam, Cat# ab15277, RRID: AB_301813            | 1:200               | 1:100                 |
| Glutamine synthetase (GS)                  | Muller glia                                                                  | BD Biosciences, Cat# 610517, RRID: AB_397879    | 1:1000              | 1:500                 |
| GFAP                                       | Astrocytes                                                                   | Sigma, Cat# G3893, RRID: AB_477010              | 1:500               | 1:500                 |
| Iba1                                       | Microglia                                                                    | Abcam, Cat# ab5076, RRID: AB_2224402            | 1:500               | 1:500                 |
| Islet1                                     | ON bipolar cells, starburst amacrine cells, subset of retinal ganglion cells | R&D system, Cat# AF1837, RRID: AB_2126324       | 1:2000              | 1:1000                |
| NG2                                        | Pericytes                                                                    | Abcam, Cat# ab129051, RRID: AB_2877152          | 1:1000              | 1:500                 |
| PKC $\alpha$                               | Rod bipolar cells                                                            | Abcam, Cat# ab31, RRID: AB_303507               | 1:500               | 1:500                 |
| PSD95                                      | Photoreceptor terminals                                                      | Abcam, Cat# ab12093, RRID: AB_298846            | 1:500               | 1:500                 |
| RIBEYE                                     | Ribbon synapses                                                              | Synaptic system, Cat#192103, RRID: AB_2086775   | 1:500               | 1:500                 |
| Secretagogin (SCGN)                        | Cone bipolar cells                                                           | BioVendor, Cat# RD181120100, RRID: AB_2034060   | 1:1000              | 1:500                 |
| Tau                                        | Microtubule-associated protein                                               | Proteintech, Cat#66499-1-Ig, RRID: AB_2881863   | 1:1000              | 1:500                 |
| $\alpha$ -Tubulin                          | $\alpha$ -Tubulin protein                                                    | Sigma, Cat#T5168-.2ML, RRID: AB_477579          | 1:1000              | 1:500                 |
| Tomm20                                     | Mitochondria                                                                 | Abcam, Cat# ab78547, RRID: AB_2043078           | 1:1000              | 1:500                 |
| Tyrosine hydroxylase (TH)                  | Dopaminergic amacrine cell subset                                            | EMD Millipore, Cat# AB1542, RRID: AB_90755      | 1:2000              | 1:500                 |
| Vesicular glutamate transporter 1 (VGlut1) | Photoreceptor ribbon synapses                                                | Abcam, Cat# ab77822, RRID: AB_2187677           | 1:500               | 1:250                 |
| Vesicular glutamate transporter 3 (VGlut3) | Subset of amacrine cells                                                     | Millipore, Cat#AB5421, RRID: AB_2187832         | 1:1000              | 1:500                 |



**Supplemental Table 2: Summary of condition variations tested for RAIN-STORM, Related to Figure 1.**

| Stage                                                                                                                                                                                                                                                | Parameter         | Variations         | Specifics                   | Total Localizations Acquired | Background Localizations | AF647 XY Res  | CF568 XY Res |          |         |
|------------------------------------------------------------------------------------------------------------------------------------------------------------------------------------------------------------------------------------------------------|-------------------|--------------------|-----------------------------|------------------------------|--------------------------|---------------|--------------|----------|---------|
| Tissue Preparation                                                                                                                                                                                                                                   | Primary Fixation  | Conc./Temp         | 1% PFA, RT, 60min           | 8213357                      | 2254413                  | 55.7234       | 39.7570      |          |         |
|                                                                                                                                                                                                                                                      |                   |                    | 2% PFA, RT, 60 min          | 8970285                      | 2398174                  | 50.3231       | 34.2027      |          |         |
|                                                                                                                                                                                                                                                      |                   |                    | 4% PFA, RT, 60 min          | 9146043                      | 3144002                  | 60.1768       | 36.6071      |          |         |
|                                                                                                                                                                                                                                                      |                   |                    | 4% PFA, 4C, 60 min          | 6779812                      | 2732175                  | 56.5597       | 35.5531      |          |         |
|                                                                                                                                                                                                                                                      |                   |                    | 0% PFA, 0.3% GA, RT, 60 min | 4914685                      | 3059107                  | 38.5014       | 27.1380      |          |         |
|                                                                                                                                                                                                                                                      |                   | Type               | 2% PFA, 0.3% GA, RT, 60 min | 5030786                      | 3181862                  | 45.1080       | 29.3187      |          |         |
|                                                                                                                                                                                                                                                      |                   |                    | 4% PFA, RT, 30 min          | 8642310                      | 3722096                  | 54.3354       | 31.3137      |          |         |
|                                                                                                                                                                                                                                                      |                   |                    | 4% PFA, RT, 120 min         | 10108757                     | 3498390                  | 48.5256       | 32.5775      |          |         |
|                                                                                                                                                                                                                                                      |                   |                    | 10mM Glycine                | 9761923                      | 2841048                  | 51.7930       | 31.7254      |          |         |
|                                                                                                                                                                                                                                                      |                   |                    | 100mM Glycine               | 12209377                     | 3525533                  | 63.2148       | 37.2768      |          |         |
|                                                                                                                                                                                                                                                      | Primary Quenching | Conc./Type         | 10mM NH3Cl                  | 9751623                      | 3043674                  | 50.2599       | 39.2483      |          |         |
|                                                                                                                                                                                                                                                      |                   |                    | 100mM NH3Cl                 | 11649151                     | 3425099                  | 55.7147       | 37.4105      |          |         |
|                                                                                                                                                                                                                                                      |                   |                    | 0.1% NaBH4                  | 10066425                     | 2222857                  | 53.5908       | 37.7183      |          |         |
|                                                                                                                                                                                                                                                      |                   |                    | 0.5% NaBH4                  | 11155141                     | 2673369                  | 52.2041       | 32.6448      |          |         |
|                                                                                                                                                                                                                                                      |                   |                    | Embedding Method            | Thickness                    | 10µm                     | 9146043       | 3144002      | 60.1768  | 36.6071 |
|                                                                                                                                                                                                                                                      |                   |                    | 20µm                        | 3775049                      | 2494498                  | 63.0147       | 66.6873      |          |         |
|                                                                                                                                                                                                                                                      | Staining          | Blocking Buffer    | Serum                       | 1% NDS                       | 12554580                 | 3953868       | 59.1086      | 29.2762  |         |
|                                                                                                                                                                                                                                                      |                   |                    |                             | 3% NDS                       | 14772243                 | 4423472       | 58.0771      | 29.6001  |         |
|                                                                                                                                                                                                                                                      |                   |                    |                             | 5% NDS                       | 10276383                 | 3368744       | 53.7408      | 30.4973  |         |
|                                                                                                                                                                                                                                                      |                   |                    |                             | 10% NDS                      | 9029693                  | 2928266       | 69.5874      | 34.9191  |         |
| 15% NDS                                                                                                                                                                                                                                              |                   |                    |                             | 13108963                     | 3920780                  | 48.8157       | 32.4246      |          |         |
| 0.1% Triton                                                                                                                                                                                                                                          |                   |                    |                             | 9958189                      | 3309736                  | 57.0414       | 25.8641      |          |         |
| Permeabilizer Type                                                                                                                                                                                                                                   |                   |                    | 0.2% Triton                 | 13145415                     | 4107653                  | 60.7598       | 35.5746      |          |         |
|                                                                                                                                                                                                                                                      |                   |                    | 0.5% Triton                 | 9849749                      | 3040177                  | 57.1852       | 35.4691      |          |         |
|                                                                                                                                                                                                                                                      |                   |                    | 1.0% Triton                 | 10455550                     | 3467400                  | 50.3823       | 30.9056      |          |         |
|                                                                                                                                                                                                                                                      |                   |                    | 2.0% Triton                 | 10179749                     | 3443009                  | 50.8491       | 27.7015      |          |         |
|                                                                                                                                                                                                                                                      |                   |                    | 0.1% Saponin                | 7443945                      | 3638982                  | 43.9059       | 26.9680      |          |         |
|                                                                                                                                                                                                                                                      |                   |                    | 0.3% Saponin                | 6084083                      | 2769395                  | 48.9074       | 33.9253      |          |         |
|                                                                                                                                                                                                                                                      |                   |                    | Permeabilizer Type          | 0.5% Saponin                 | 6343524                  | 2916079       | 64.1917      | 41.0107  |         |
|                                                                                                                                                                                                                                                      |                   |                    |                             | 1.0% Saponin                 | 7614606                  | 3039943       | 50.7969      | 32.2521  |         |
|                                                                                                                                                                                                                                                      |                   |                    |                             | 2.0% Saponin                 | 6171508                  | 2849209       | 71.0758      | 39.7984  |         |
|                                                                                                                                                                                                                                                      |                   |                    |                             | Time                         | 10m Block                | 6165974       | 2671417      | 41.6942  | 37.3808 |
|                                                                                                                                                                                                                                                      |                   |                    |                             | Temp/Time                    | 4°C, 30 min              | 5067694       | 2089764      | 45.6442  | 35.7788 |
|                                                                                                                                                                                                                                                      |                   |                    |                             |                              | 4°C, 120 min             | 5032729       | 2042575      | 45.9341  | 35.4185 |
| Temp/Time                                                                                                                                                                                                                                            |                   |                    | RT, 30 min                  | 5802683                      | 2586804                  | 43.9987       | 42.6722      |          |         |
|                                                                                                                                                                                                                                                      |                   |                    | RT, 120 min                 | 5932099                      | 2392430                  | 48.0725       | 34.6311      |          |         |
| Primary Antibody                                                                                                                                                                                                                                     |                   |                    | Protein Targets             | Cabeladin                    |                          |               |              |          |         |
|                                                                                                                                                                                                                                                      |                   |                    |                             | CAR                          |                          |               |              |          |         |
|                                                                                                                                                                                                                                                      |                   |                    |                             | PKCa                         |                          |               |              |          |         |
|                                                                                                                                                                                                                                                      |                   |                    |                             | Rbeye                        |                          |               |              |          |         |
|                                                                                                                                                                                                                                                      |                   |                    |                             | PSD95                        |                          |               |              |          |         |
|                                                                                                                                                                                                                                                      |                   |                    |                             | Desmin                       |                          |               |              |          |         |
|                                                                                                                                                                                                                                                      |                   |                    |                             | Iba1                         |                          |               |              |          |         |
|                                                                                                                                                                                                                                                      |                   |                    |                             | SCGN                         |                          |               |              |          |         |
|                                                                                                                                                                                                                                                      |                   |                    |                             | Dystrophin                   |                          |               |              |          |         |
|                                                                                                                                                                                                                                                      |                   |                    |                             | GS                           |                          |               |              |          |         |
|                                                                                                                                                                                                                                                      |                   | GFAP               |                             |                              |                          |               |              |          |         |
|                                                                                                                                                                                                                                                      |                   | Islat1             |                             |                              |                          |               |              |          |         |
|                                                                                                                                                                                                                                                      |                   | Connexin43         |                             |                              |                          |               |              |          |         |
|                                                                                                                                                                                                                                                      |                   | a-Tubulin          |                             |                              |                          |               |              |          |         |
|                                                                                                                                                                                                                                                      |                   | Tom20              |                             |                              |                          |               |              |          |         |
|                                                                                                                                                                                                                                                      |                   | CD31               |                             |                              |                          |               |              |          |         |
|                                                                                                                                                                                                                                                      |                   | Collagen IV        |                             |                              |                          |               |              |          |         |
|                                                                                                                                                                                                                                                      |                   | VGLU1              |                             |                              |                          |               |              |          |         |
|                                                                                                                                                                                                                                                      |                   | VGLU3              |                             |                              |                          |               |              |          |         |
|                                                                                                                                                                                                                                                      |                   | Tau                |                             |                              |                          |               |              |          |         |
|                                                                                                                                                                                                                                                      |                   | NC2                |                             |                              |                          |               |              |          |         |
|                                                                                                                                                                                                                                                      |                   | AF647 1:100        |                             | 6073156                      | 1867141                  | 65.7862       |              |          |         |
|                                                                                                                                                                                                                                                      |                   | AF647 1:1000       |                             | 3739319                      | 1475533                  | 43.9605       | N/A          |          |         |
|                                                                                                                                                                                                                                                      |                   | AF647 1:5000       |                             | 1188206                      | 478033                   | 38.4452       |              |          |         |
|                                                                                                                                                                                                                                                      |                   | CF568 1:100        |                             | 6320942                      | 2239627                  |               | 30.8011      |          |         |
|                                                                                                                                                                                                                                                      |                   | CF568 1:1000       |                             | 3430498                      | 1453105                  | N/A           | 35.4525      |          |         |
|                                                                                                                                                                                                                                                      |                   | CF568 1:5000       |                             | 855764                       | 445694                   |               | 29.7523      |          |         |
|                                                                                                                                                                                                                                                      |                   | Secondary Antibody |                             | Fluorophore/Conc.            | 1% PFA, 10 min           | 6260957       | 2373438      | 46.1414  | 33.8572 |
|                                                                                                                                                                                                                                                      |                   |                    |                             |                              | 2% PFA, 10 min           | 6750477       | 2604387      | 48.1056  | 32.2951 |
|                                                                                                                                                                                                                                                      |                   |                    |                             |                              | 4% PFA, 10 min           | 8659132       | 3367457      | 54.9271  | 36.2804 |
| 1% PFA, 30 min                                                                                                                                                                                                                                       |                   |                    | 5374777                     |                              | 2091335                  | 55.9734       | 33.1415      |          |         |
| 2% PFA, 30 min                                                                                                                                                                                                                                       |                   |                    | 7270814                     |                              | 2700660                  | 54.2458       | 42.6215      |          |         |
| Conc./Time                                                                                                                                                                                                                                           |                   |                    | 4% PFA, 30 min              | 8267553                      | 2996594                  | 47.6018       | 35.7969      |          |         |
|                                                                                                                                                                                                                                                      |                   |                    | 10mM Glycine                | 5330971                      | 1691966                  | 65.6889       | 55.4278      |          |         |
|                                                                                                                                                                                                                                                      |                   |                    | 100mM Glycine               | 5636215                      | 1918352                  | 46.5097       | 44.4271      |          |         |
|                                                                                                                                                                                                                                                      |                   |                    | 10mM NH3Cl                  | 4791254                      | 2077605                  | 55.9535       | 46.1726      |          |         |
|                                                                                                                                                                                                                                                      |                   |                    | 100mM NH3Cl                 | 8210985                      | 1932665                  | 52.5240       | 43.5233      |          |         |
| GLOX                                                                                                                                                                                                                                                 |                   | Catalase           | 0mM BME                     | 13030311                     | 3553994                  | 78.36503      | 61.88567     |          |         |
|                                                                                                                                                                                                                                                      |                   |                    | 71.5mM BME                  | 10612112                     | 2538832                  | 70.96677      | 46.30657     |          |         |
|                                                                                                                                                                                                                                                      |                   |                    | 143mM BME                   | 11190641                     | 2723165                  | 88.47950      | 68.97667     |          |         |
|                                                                                                                                                                                                                                                      |                   |                    | 286mM BME                   | 9332914                      | 2006797                  | 73.10220      | 72.54603     |          |         |
|                                                                                                                                                                                                                                                      |                   |                    | 0U Catalase                 | 7104374                      | 1453545                  | 77.87603      | 71.28623     |          |         |
|                                                                                                                                                                                                                                                      |                   |                    | 20U Catalase                | 7137281                      | 2047426                  | 72.29090      | 76.41330     |          |         |
|                                                                                                                                                                                                                                                      |                   |                    | 100U Catalase               | 9595769                      | 2075109                  | 84.14287      | 65.44140     |          |         |
|                                                                                                                                                                                                                                                      |                   |                    | 500U Catalase               | 10195843                     | 2537068                  | 71.02247      | 64.64657     |          |         |
|                                                                                                                                                                                                                                                      |                   |                    | Glucose Ox.                 | 0U Glu. Ox.                  | 7104374                  | 1453545       | 77.87603     | 71.28623 |         |
|                                                                                                                                                                                                                                                      |                   |                    |                             | 10U Glu. Ox.                 | 7137281                  | 2047426       | 72.29090     | 76.41330 |         |
|                                                                                                                                                                                                                                                      |                   | 20U Glu. Ox.       |                             | 9595769                      | 2075109                  | 84.14287      | 65.44140     |          |         |
|                                                                                                                                                                                                                                                      |                   | 40U Glu. Ox.       |                             | 10195843                     | 2537068                  | 71.02247      | 64.64657     |          |         |
|                                                                                                                                                                                                                                                      |                   | 0mM MEA            |                             | 10036933                     | 2362114                  | 82.48007      | 67.48763     |          |         |
|                                                                                                                                                                                                                                                      |                   | 10mM MEA           |                             | 11484612                     | 2540791                  | 74.56673      | 75.99387     |          |         |
|                                                                                                                                                                                                                                                      |                   | 20mM MEA           |                             | 8917762                      | 2307084                  | 71.94410      | 66.66033     |          |         |
|                                                                                                                                                                                                                                                      |                   | 40mM MEA           |                             | 9962371                      | 2736120                  | 73.49553      | 75.60517     |          |         |
|                                                                                                                                                                                                                                                      |                   | 0mM BME            |                             | 6344927                      | 2172067                  | 63.94573      | 44.79663     |          |         |
|                                                                                                                                                                                                                                                      |                   | 71.5mM BME         |                             | 6632177                      | 2110500                  | 75.79637      | 55.62803     |          |         |
|                                                                                                                                                                                                                                                      |                   | PPT                | BME                         | 143mM BME                    | 6865185                  | 1935796       | 71.76753     | 63.42270 |         |
|                                                                                                                                                                                                                                                      |                   |                    |                             | 286mM BME                    | 6990130                  | 2025152       | 64.24200     | 49.40647 |         |
|                                                                                                                                                                                                                                                      |                   |                    |                             | 0U PCD                       | 1878393                  | 1100339       | 63.68107     | 42.81973 |         |
|                                                                                                                                                                                                                                                      |                   |                    |                             | -0.09U PCD                   | 3218723                  | 1402939       | 68.00433     | 55.09720 |         |
|                                                                                                                                                                                                                                                      |                   |                    |                             | -0.17U PCD                   | 3178465                  | 1258718       | 71.34050     | 60.59277 |         |
|                                                                                                                                                                                                                                                      |                   |                    | PCD                         | -0.35U PCD                   | 2138172                  | 1068920       | 53.55533     | 44.69093 |         |
|                                                                                                                                                                                                                                                      |                   |                    |                             | 0mM MEA                      | 4388805                  | 1545313       | 53.09887     | 54.86183 |         |
|                                                                                                                                                                                                                                                      |                   |                    |                             | 10mM MEA                     | 4151177                  | 1465681       | 73.34697     | 68.12620 |         |
|                                                                                                                                                                                                                                                      |                   |                    |                             | 20mM MEA                     | 3063824                  | 1336807       | 70.74163     | 56.03840 |         |
|                                                                                                                                                                                                                                                      |                   |                    |                             | 40mM MEA                     | 2834421                  | 1417678       | 58.42780     | 54.92740 |         |
|                                                                                                                                                                                                                                                      |                   | PCA                | MEA                         | 0mM PCA                      | 1501576                  | 99725         | 62.61477     | 45.58707 |         |
|                                                                                                                                                                                                                                                      |                   |                    |                             | 1mM PCA                      | 4425433                  | 1679832       | 74.27553     | 74.12297 |         |
| 2mM PCA                                                                                                                                                                                                                                              |                   |                    |                             | 3473750                      | 1608543                  | 72.83673      | 55.05123     |          |         |
| 4mM PCA                                                                                                                                                                                                                                              |                   |                    |                             | 2099282                      | 1104718                  | 72.42687      | 63.55333     |          |         |
| 0mM BME                                                                                                                                                                                                                                              |                   |                    |                             | 6344927                      | 2172067                  | 63.9457       | 44.7966      |          |         |
| POC                                                                                                                                                                                                                                                  |                   |                    | BME                         | 71.5mM BME                   | 6632177                  | 2110500       | 75.7964      | 55.6280  |         |
|                                                                                                                                                                                                                                                      |                   |                    |                             | 143mM BME                    | 6865185                  | 1935796       | 71.7675      | 63.4227  |         |
|                                                                                                                                                                                                                                                      |                   |                    |                             | 286mM BME                    | 6990130                  | 2025152       | 64.2420      | 49.4065  |         |
|                                                                                                                                                                                                                                                      |                   |                    |                             | 0U Py. Ox.                   | 6160037                  | 1606622       | 69.9593      | 44.6356  |         |
|                                                                                                                                                                                                                                                      |                   |                    |                             | 1U Py. Ox.                   | 7348113                  | 1753847       | 85.9037      | 59.7095  |         |
|                                                                                                                                                                                                                                                      |                   | Pyranose Ox.       | 5U Py. Ox.                  | 6057926                      | 1699933                  | 86.5024       | 60.1876      |          |         |
|                                                                                                                                                                                                                                                      |                   |                    | 10U Py. Ox.                 | 7268535                      | 2161980                  | 82.4528       | 59.1651      |          |         |
|                                                                                                                                                                                                                                                      |                   |                    | 0mM MEA                     | 8338811                      | 2172407                  | 85.3317       | 60.0705      |          |         |
|                                                                                                                                                                                                                                                      |                   |                    | 10mM MEA                    | 6045768                      | 1873840                  | 77.7011       | 52.7179      |          |         |
|                                                                                                                                                                                                                                                      |                   |                    | 20mM MEA                    | 6072488                      | 2293750                  | 73.6791       | 55.3963      |          |         |
| Electron Sinks                                                                                                                                                                                                                                       | Conc./Type        | 40mM MEA           | 6479168                     | 1771027                      | 74.9191                  | 50.7731       |              |          |         |
|                                                                                                                                                                                                                                                      |                   | 0U Catalase        | 6053582                     | 1916488                      | 67.6008                  | 57.5033       |              |          |         |
|                                                                                                                                                                                                                                                      |                   | 20U Catalase       | 6486951                     | 2078212                      | 88.8967                  | 68.1553       |              |          |         |
|                                                                                                                                                                                                                                                      |                   | 100U Catalase      | 7462499                     | 2963145                      | 83.4481                  | 59.2703       |              |          |         |
|                                                                                                                                                                                                                                                      |                   | 500U Catalase      | 8097364                     | 2179157                      | 79.8785                  | 50.1370       |              |          |         |
|                                                                                                                                                                                                                                                      | Conc./Type        | 1mM Trolox         | 10297129                    | 2172781                      | 76.4754                  | 82.0630       |              |          |         |
|                                                                                                                                                                                                                                                      |                   | 2mM Trolox         | 5733708                     | 1578968                      | 75.8681                  | 85.4778       |              |          |         |
|                                                                                                                                                                                                                                                      |                   | 5mM Trolox         | 2270131                     | 862326                       | 70.5364                  | 70.7546       |              |          |         |
|                                                                                                                                                                                                                                                      |                   | 1mM COT            | 7249814                     | 2213086                      | 68.4071                  | 53.4930       |              |          |         |
|                                                                                                                                                                                                                                                      |                   | 2mM COT            | 8668903                     | 1677820                      | 79.6458                  | 78.9307       |              |          |         |
| 5mM COT                                                                                                                                                                                                                                              | 7412183           | 1543031            | 76.8966                     | 62.1923                      |                          |               |              |          |         |
| Optimized RAIN-STORM                                                                                                                                                                                                                                 |                   |                    |                             | 12804183.3333                | 7082472.0000             | 61.1141       | 31.2234      |          |         |
| 2% PFA 4C 60 min, 100mM Gly 4C 60min, 5% NDS, 0.5% Triton, 60min RT Block, 1.500 Ph DI 12h, 1:100 Sec Di 60min, 4% PFA 30min, 100mM NH4Cl 30min, 1U Py. Ox, 143mM BME, 200U Catalase, 40mM MEA, 2mM COT, 200nm Step size, 250f, 3 cycle, 0.16µm, 25p |                   |                    |                             |                              |                          |               |              |          |         |
| 85000                                                                                                                                                                                                                                                |                   |                    |                             |                              | 1.50E+07                 | localizations |              |          |         |
| 20                                                                                                                                                                                                                                                   |                   |                    |                             |                              | 90                       | nm            |              |          |         |
| Abbreviations                                                                                                                                                                                                                                        |                   |                    |                             |                              |                          |               |              |          |         |
| RT                                                                                                                                                                                                                                                   | room temperature  |                    |                             |                              |                          |               |              |          |         |
| U                                                                                                                                                                                                                                                    | Units             |                    |                             |                              |                          |               |              |          |         |
